# Supplementary material for: Transcriptome Analysis Reveals Immunomodulatory Effect of Spore-Displayed p75 on Human Intestinal Epithelial Caco-2 Cells
Source: MDPI journal article supplement (doi:10.3390/ijms232314519), 2022-11-22
Supplement: s1 [file s1]

**Journal name:**

International Journal of Molecular Sciences

**Manuscript title:**

Transcriptome analysis reveals immunomodulatory effect of spore-displayed p75 on human intestinal epithelial Caco-2 cells

**The names of the authors:**

Soo Ji Kang<sup>1</sup>, Ji Su Jun<sup>1</sup>, and Kwang Won Hong<sup>1,\*</sup>

**The affiliation and address of the authors:**

<sup>1</sup>Department of Food Science and Biotechnology, College of Life Science and Biotechnology, Dongguk University, Goyang-si 10326, Republic of Korea

**\* Corresponding author:** Kwang Won Hong (E-mail address: [hkwon@dongguk.edu](mailto:hkwon@dongguk.edu), Tel: +82-31-961-5140, Fax: +82-31-961-5108)

**Table S1.** Throughput and quality of RNA-seq data.

| Sample name <sup>a</sup> | Raw reads  | Clean reads | GC content (%) | Q30 (%) <sup>b</sup> | Mapped reads <sup>c</sup> |
|--------------------------|------------|-------------|----------------|----------------------|---------------------------|
| CON_1                    | 89,326,720 | 88,475,266  | 49.54          | 96.46                | 87,260,249 (98.63%)       |
| CON_2                    | 76,543,046 | 67,876,956  | 46             | 95.35                | 73,615,078 (98.62%)       |
| CON_3                    | 66,918,198 | 78,407,308  | 46.53          | 95.72                | 65,050,378 (98.78%)       |
| WT_1                     | 84,230,456 | 83,453,836  | 49.42          | 96.35                | 82,452,280 (98.8%)        |
| WT_2                     | 73,224,820 | 62,388,808  | 46.68          | 95.71                | 71,082,357 (98.67%)       |
| WT_3                     | 68,284,754 | 58,381,418  | 46.58          | 95.28                | 65,983,072 (98.54%)       |
| G75_1                    | 80,141,736 | 79,393,794  | 49.32          | 96.46                | 78,472,316 (98.84%)       |
| G75_2                    | 81,607,548 | 77,436,816  | 46.46          | 95.82                | 76,295,758 (98.53%)       |
| G75_3                    | 87,526,726 | 74,204,110  | 47             | 95.8                 | 73,086,916 (98.49%)       |

<sup>a</sup> Each sample represents Caco-2 cells unstimulated (CON) or stimulated with wild-type spore (WT) and CotG-p75 (G75), respectively

<sup>b</sup> Q30 indicates the percentage of the sequencing data with an error rate less than 0.1%

<sup>c</sup> Mapped reads represent the reads of clean bases mapped to the reference genome

**Table S2.** List of differentially expressed genes between wild-type spores stimulated Caco-2 cells and control.

| Gene ID   | Transcript ID                                          | Gene Symbol          | Description                                                          | Fold change | Raw <i>p</i> -val |
|-----------|--------------------------------------------------------|----------------------|----------------------------------------------------------------------|-------------|-------------------|
| 84218     | NM_032258,NM_032258_dup1,NM_032258_dup2,NM_032258_dup3 | <i>TBC1D3F</i>       | TBC1 domain family member 3F                                         | 18.961402   | 0.000214469       |
| 170688    | NR_104005                                              | <i>NUDT4P2</i>       | nudix hydrolase 4 pseudogene 2                                       | 18.452825   | 0.005955287       |
| 100534612 | NR_037951                                              | <i>C1QTNF3-AMACR</i> | C1QTNF3-AMACR readthrough (NMD candidate)                            | 8.032839    | 4.31517E-05       |
| 827       | NM_014289                                              | <i>CAPN6</i>         | calpain 6                                                            | 7.473258    | 1.98259E-07       |
| 102465252 | NR_106761                                              | <i>MIR6506</i>       | microRNA 6506                                                        | 6.840195    | 0.038148197       |
| 100271849 | NM_001145785                                           | <i>MEF2B</i>         | myocyte enhancer factor 2B                                           | 6.238428    | 0.000403539       |
| 56112     | NM_018916,NM_032011                                    | <i>PCDHGA3</i>       | protocadherin gamma subfamily A, 3                                   | 6.093560    | 0.012781763       |
| 11277     | NM_007248,NM_016381,NM_033629                          | <i>TREX1</i>         | three prime repair exonuclease 1                                     | 6.034128    | 0.010662644       |
| 5239      | NM_021965                                              | <i>PGM5</i>          | phosphoglucomutase 5                                                 | 4.928959    | 0.006035839       |
| 6887      | NM_005421                                              | <i>TAL2</i>          | TAL bHLH transcription factor 2                                      | 4.756164    | 0.031704327       |
| 26134     | NR_104269                                              | <i>RALGAPA1P1</i>    | Ral GTPase activating protein catalytic alpha subunit 1 pseudogene 1 | 4.406933    | 0.037462804       |
| 105377623 | NR_136203                                              | <i>LOC105377623</i>  | uncharacterized LOC105377623                                         | 4.318840    | 0.015946482       |
| 3627      | NM_001565                                              | <i>CXCL10</i>        | C-X-C motif chemokine ligand 10                                      | 4.314596    | 2.15252E-06       |

|           |                                                                            |                     |                                               |          |             |
|-----------|----------------------------------------------------------------------------|---------------------|-----------------------------------------------|----------|-------------|
| 55351     | NM_001306082,NM_001345969,NM_018401                                        | <i>STK32B</i>       | serine/threonine kinase 32B                   | 3.891382 | 0.038669644 |
| 1558      | NM_000770,NM_001198853,NM_001198854,NM_001198855                           | <i>CYP2C8</i>       | cytochrome P450 family 2 subfamily C member 8 | 3.748785 | 0.022754473 |
| 121643    | NM_213596                                                                  | <i>FOXP4</i>        | forkhead box N4                               | 3.640509 | 0.002875798 |
| 56674     | NM_001286094,NM_001286095,NM_020644                                        | <i>TMEM9B</i>       | TMEM9 domain family member B                  | 3.485800 | 0.001745819 |
| 100532724 | NR_037804                                                                  | <i>NPHP3-ACAD11</i> | NPHP3-ACAD11 readthrough (NMD candidate)      | 3.425432 | 0.001761894 |
| 29075     | NR_026883,NR_026884                                                        | <i>LINC00652</i>    | long intergenic non-protein coding RNA 652    | 3.304828 | 0.025566796 |
| 6844      | NM_001330125,NM_014232                                                     | <i>VAMP2</i>        | vesicle associated membrane protein 2         | 3.292158 | 0.002847442 |
| 340547    | NM_001170553,NM_182607                                                     | <i>VSIG1</i>        | V-set and immunoglobulin domain containing 1  | 3.141374 | 0.032233996 |
| 56963     | NM_001166283,NM_001166286,NM_001166287,NM_001166288,NM_001166289,NM_020211 | <i>RGMA</i>         | repulsive guidance molecule family member a   | 3.060160 | 0.028147048 |
| 9154      | NM_001287761,NM_001287762,NM_001321721,NM_001321722,NM_004213,NM_201651    | <i>SLC28A1</i>      | solute carrier family 28 member 1             | 3.055652 | 0.026024006 |
| 3576      | NM_000584                                                                  | <i>CXCL8</i>        | C-X-C motif chemokine ligand 8                | 2.916596 | 1.09178E-05 |
| 2919      | NM_001511,NR_046035                                                        | <i>CXCL1</i>        | C-X-C motif chemokine ligand 1                | 2.871927 | 6.71872E-07 |
| 387804    | NM_001144871                                                               | <i>VSTM5</i>        | V-set and transmembrane domain containing 5   | 2.817476 | 0.031889685 |
| 158158    | NM_152573                                                                  | <i>RASEF</i>        | RAS and EF-hand domain containing             | 2.812715 | 0.014095148 |

|           |                                                                                 |                     |                                                                    |          |             |
|-----------|---------------------------------------------------------------------------------|---------------------|--------------------------------------------------------------------|----------|-------------|
| 6288      | NM_000331,NM_001178006,NM_199161                                                | <i>SAA1</i>         | serum amyloid A1                                                   | 2.749324 | 0.001482969 |
| 23166     | NM_015136                                                                       | <i>STAB1</i>        | stabilin 1                                                         | 2.638764 | 0.04040277  |
| 2200      | NM_000138                                                                       | <i>FBN1</i>         | fibrillin 1                                                        | 2.627290 | 0.049224873 |
| 6364      | NM_001130046,NM_004591                                                          | <i>CCL20</i>        | C-C motif chemokine ligand 20                                      | 2.614781 | 1.89372E-40 |
| 503569    | NR_033932                                                                       | <i>RGMB-AS1</i>     | RGMB antisense RNA 1                                               | 2.386338 | 0.030308704 |
| 10186     | NM_005780                                                                       | <i>LHFP</i>         | lipoma HMGIC fusion partner                                        | 2.362741 | 0.04903843  |
| 8676      | NM_003764                                                                       | <i>STX11</i>        | syntaxin 11                                                        | 2.295532 | 0.021297684 |
| 6289      | NM_001127380,NM_030754                                                          | <i>SAA2</i>         | serum amyloid A2                                                   | 2.286038 | 0.00012663  |
| 1316      | NM_001160124,NM_001160125,NM_001300,NR_027653                                   | <i>KLF6</i>         | Kruppel like factor 6                                              | 2.235175 | 7.46084E-46 |
| 64221     | NM_022370                                                                       | <i>ROBO3</i>        | roundabout guidance receptor 3                                     | 2.196472 | 0.020696525 |
| 100507053 | NR_037884                                                                       | <i>LOC100507053</i> | uncharacterized LOC100507053                                       | 2.184420 | 0.01692473  |
| 6016      | NM_001256820,NM_001256821,NM_006912                                             | <i>RIT1</i>         | Ras like without CAAX 1                                            | 2.179966 | 0.049585676 |
| 25804     | NM_001252129,NM_012321                                                          | <i>LSM4</i>         | LSM4 homolog, U6 small nuclear RNA and mRNA degradation associated | 2.154356 | 0.004411372 |
| 100303453 | NR_028393,NR_028394,NR_028395,NR_028396,NR_028397,NR_028398,NR_028399,NR_028400 | <i>TSNAX-DISC1</i>  | TSNAX-DISC1 readthrough (NMD candidate)                            | 2.119292 | 0.036895458 |

|           |                                                            |                            |                                                                                  |           |             |
|-----------|------------------------------------------------------------|----------------------------|----------------------------------------------------------------------------------|-----------|-------------|
| 222663    | NM_001303136,NM_152753                                     | <i>SCUBE3</i>              | signal peptide, CUB domain and EGF like domain containing 3                      | 2.116989  | 0.029152277 |
| 10228     | NM_001286210,NM_005819                                     | <i>STX6</i>                | syntaxin 6                                                                       | 2.106314  | 0.030699016 |
| 9308      | NM_001040280,NM_001251901,NM_004233                        | <i>CD83</i>                | CD83 molecule                                                                    | 2.098569  | 0.000919424 |
| 6585      | NM_003061                                                  | <i>SLIT1</i>               | slit guidance ligand 1                                                           | 2.074743  | 0.040270358 |
| 146754    | NM_001303270,NM_020877                                     | <i>DNAH2</i>               | dynein axonemal heavy chain 2                                                    | 2.066093  | 0.024045255 |
| 6752      | NM_001050                                                  | <i>SSTR2</i>               | somatostatin receptor 2                                                          | 2.032396  | 0.028383156 |
| 27071     | NM_001306151,NM_014395                                     | <i>DAPPI</i>               | dual adaptor of phosphotyrosine and 3-phosphoinositides 1                        | 2.025425  | 0.041354917 |
| 643596    | NM_001190228                                               | <i>RNF224</i>              | ring finger protein 224                                                          | -2.027034 | 0.031640547 |
| 1727      | NM_000398,NM_001129819,NM_001171660,NM_001171661,NM_007326 | <i>CYB5R3</i>              | cytochrome b5 reductase 3                                                        | -2.039841 | 0.026078049 |
| 100422558 | NR_135312                                                  | <i>SMG1P6</i>              | SMG1P6, nonsense mediated mRNA decay associated PI3K related kinase pseudogene 6 | -2.096502 | 0.000135337 |
| 375387    | NM_198565                                                  | <i>NRROS</i>               | negative regulator of reactive oxygen species                                    | -2.175426 | 0.008351408 |
| 107080638 | NM_001318809,NR_134872                                     | <i>TBC1D7-LOC100130357</i> | TBC1D7-LOC100130357 readthrough                                                  | -2.252059 | 0.048645776 |
| 3705      | NM_001142593,NM_001142594,NM_014216                        | <i>ITPK1</i>               | inositol-tetrakisphosphate 1-kinase                                              | -2.368665 | 0.004564373 |

|           |                                                                                                                       |                     |                                                           |           |             |
|-----------|-----------------------------------------------------------------------------------------------------------------------|---------------------|-----------------------------------------------------------|-----------|-------------|
| 107303344 | NM_001320727,NR_135324                                                                                                | <i>SETDB2-PHF11</i> | SETDB2-PHF11 readthrough                                  | -2.401257 | 0.043898727 |
| 728689    | NM_001099661,NM_001099661_dup1,NM_001317856,NM_001317856_dup1,NM_001317857,NM_001317857_dup1                          | <i>EIF3CL</i>       | eukaryotic translation initiation factor 3 subunit C like | -2.443269 | 0.047359397 |
| 56961     | NM_020209                                                                                                             | <i>SHD</i>          | Src homology 2 domain containing transforming protein D   | -2.474844 | 0.041905817 |
| 642402    | NR_111962                                                                                                             | <i>GOLGA6L17P</i>   | golgin A6 family-like 17, pseudogene                      | -2.487276 | 0.012754051 |
| 23491     | NM_001185176,NM_001185177,NM_024922                                                                                   | <i>CES3</i>         | carboxylesterase 3                                        | -2.549066 | 0.010843784 |
| 101929567 | NR_110257                                                                                                             | <i>LINC01814</i>    | long intergenic non-protein coding RNA 1814               | -2.617591 | 0.028115297 |
| 1656      | NM_001257191,NM_004397                                                                                                | <i>DDX6</i>         | DEAD-box helicase 6                                       | -2.626878 | 0.007615058 |
| 653333    | NM_001137610                                                                                                          | <i>FAM86B2</i>      | family with sequence similarity 86 member B2              | -2.696774 | 0.004693836 |
| 6495      | NM_005982                                                                                                             | <i>SIX1</i>         | SIX homeobox 1                                            | -2.711301 | 0.046926214 |
| 134429    | NM_001308056,NM_001308057,NM_001308058,NM_001308059,NM_001308060,NM_001308061,NM_139164,NR_131752,NR_131753,NR_131754 | <i>STARD4</i>       | StAR related lipid transfer domain containing 4           | -2.728938 | 0.010090297 |
| 201501    | NM_001039360,NM_001318841                                                                                             | <i>ZBTB7C</i>       | zinc finger and BTB domain containing 7C                  | -2.879693 | 0.02065907  |

|           |                                                  |                   |                                                         |           |             |
|-----------|--------------------------------------------------|-------------------|---------------------------------------------------------|-----------|-------------|
| 7781      | NM_001318949,NM_001318950,NM_001318951,NM_003459 | <i>SLC30A3</i>    | solute carrier family 30 member 3                       | -3.000219 | 0.035474973 |
| 407975    | NR_027349,NR_027350                              | <i>MIR17HG</i>    | miR-17-92a-1 cluster host gene                          | -3.247756 | 0.004824816 |
| 55073     | NR_002940                                        | <i>LRRC37A4P</i>  | leucine rich repeat containing 37 member A4, pseudogene | -3.489345 | 0.005117573 |
| 100131561 | NR_024013                                        | <i>FKSG29</i>     | FKSG29                                                  | -3.698458 | 0.041046714 |
| 197196    | NR_038859                                        | <i>LINC00311</i>  | long intergenic non-protein coding RNA 311              | -4.103307 | 0.02243765  |
| 347694    | NR_028501                                        | <i>ECELIP2</i>    | endothelin converting enzyme like 1 pseudogene 2        | -4.197553 | 0.025469768 |
| 100861412 | NM_001256141                                     | <i>FSBP</i>       | fibrinogen silencer binding protein                     | -4.239391 | 0.01869087  |
| 5555      | NM_001110213                                     | <i>PRH2</i>       | proline rich protein HaeIII subfamily 2                 | -4.438711 | 0.028546589 |
| 257044    | NM_001130957,NM_001242340,NM_173807              | <i>CATSPERE</i>   | catsper channel auxiliary subunit epsilon               | -4.460617 | 0.022646154 |
| 9073      | NM_199328                                        | <i>CLDN8</i>      | claudin 8                                               | -5.748759 | 0.040771417 |
| 729873    | NM_001123391,NM_001123391_dup1                   | <i>TBC1D3</i>     | TBC1 domain family member 3                             | -5.889728 | 0.040851376 |
| 100137049 | NM_001114633                                     | <i>PLA2G4B</i>    | phospholipase A2 group IVB                              | -6.684008 | 0.044529946 |
| 100616394 | NR_039646_chr2,NR_039646_chr3                    | <i>MIR4444-1</i>  | microRNA 4444-1                                         | -6.951703 | 0.002232175 |
| 100533179 | NR_037904                                        | <i>UBE2F-SCLY</i> | UBE2F-SCLY readthrough (NMD candidate)                  | -7.585978 | 8.94368E-06 |



|           |                                                  |                     |                                                           |            |             |
|-----------|--------------------------------------------------|---------------------|-----------------------------------------------------------|------------|-------------|
| 100631383 | NM_001242939                                     | <i>FAM47E-STBD1</i> | FAM47E-STBD1 readthrough                                  | -7.799596  | 0.047410174 |
| 140564    | NM_152426                                        | <i>APOBEC3D</i>     | apolipoprotein B mRNA editing enzyme catalytic subunit 3D | -8.372159  | 2.7395E-10  |
| 54065     | NM_058182                                        | <i>SMIM11A</i>      | small integral membrane protein 11A                       | -10.725595 | 0.015284053 |
| 474384    | NM_001007524,NM_001007524_dup1,NM_001007524_dup2 | <i>F8A3</i>         | coagulation factor VIII-associated 3                      | -21.111247 | 0.006049599 |
| 100846999 | NR_049831_chr2,NR_049831_chr3                    | <i>MIR4444-2</i>    | microRNA 4444-2                                           | -23.016168 | 6.25565E-05 |

**Table S3.** List of differentially expressed genes between CotG-p75 stimulated Caco-2 cells and control.

| Gene ID   | Transcript ID                                                      | Gene Symbol          | Description                                   | Fold change | Raw <i>p</i> -val |
|-----------|--------------------------------------------------------------------|----------------------|-----------------------------------------------|-------------|-------------------|
| 3627      | NM_001565                                                          | <i>CXCL10</i>        | C-X-C motif chemokine ligand 10               | 35.584875   | 5.23266E-34       |
| 6364      | NM_001130046,NM_004591                                             | <i>CCL20</i>         | C-C motif chemokine ligand 20                 | 21.176225   | 0                 |
| 101060321 | NM_001291462,NM_001291462_dup1,NM_001291462_dup2,NM_001291462_dup3 | <i>TBC1D3G</i>       | TBC1 domain family member 3G                  | 20.731774   | 0.014788059       |
| 3576      | NM_000584                                                          | <i>CXCL8</i>         | C-X-C motif chemokine ligand 8                | 20.169180   | 4.15023E-38       |
| 2919      | NM_001511,NR_046035                                                | <i>CXCL1</i>         | C-X-C motif chemokine ligand 1                | 16.814684   | 9.55903E-41       |
| 100534612 | NR_037951                                                          | <i>CIQTNF3-AMACR</i> | CIQTNF3-AMACR readthrough (NMD candidate)     | 14.844345   | 1.01011E-07       |
| 84218     | NM_032258,NM_032258_dup1,NM_032258_dup2,NM_032258_dup3             | <i>TBC1D3F</i>       | TBC1 domain family member 3F                  | 12.517674   | 0.000857422       |
| 330       | NM_001165,NM_182962                                                | <i>BIRC3</i>         | baculoviral IAP repeat containing 3           | 11.904057   | 3.7596E-218       |
| 1543      | NM_000499,NM_001319216,NM_001319217                                | <i>CYP1A1</i>        | cytochrome P450 family 1 subfamily A member 1 | 11.796821   | 0                 |
| 2770      | NM_001256414,NM_002069                                             | <i>GNAI1</i>         | G protein subunit alpha i1                    | 11.539755   | 1.29568E-10       |
| 2921      | NM_002090                                                          | <i>CXCL3</i>         | C-X-C motif chemokine ligand 3                | 8.098634    | 3.92626E-52       |
| 157739    | NR_001578                                                          | <i>TDH</i>           | L-threonine dehydrogenase (pseudogene)        | 7.274196    | 1.69932E-05       |
| 6288      | NM_000331,NM_001178006,NM_199161                                   | <i>SAA1</i>          | serum amyloid A1                              | 6.837343    | 6.48104E-10       |

|           |                                     |                      |                                               |          |             |
|-----------|-------------------------------------|----------------------|-----------------------------------------------|----------|-------------|
| 9308      | NM_001040280,NM_001251901,NM_004233 | <i>CD83</i>          | CD83 molecule                                 | 6.746527 | 5.46459E-19 |
| 8676      | NM_003764                           | <i>STX11</i>         | syntaxin 11                                   | 6.591671 | 5.99685E-08 |
| 121643    | NM_213596                           | <i>FOXM4</i>         | forkhead box N4                               | 6.589470 | 9.81955E-06 |
| 1545      | NM_000104                           | <i>CYP1B1</i>        | cytochrome P450 family 1 subfamily B member 1 | 6.556214 | 1.76862E-64 |
| 100533970 | NR_037928                           | <i>P2RX5-TAX1BP3</i> | P2RX5-TAX1BP3 readthrough (NMD candidate)     | 6.293272 | 0.001128609 |
| 6373      | NM_001302123,NM_005409              | <i>CXCL11</i>        | C-X-C motif chemokine ligand 11               | 5.913225 | 0.002376425 |
| 8862      | NM_017413                           | <i>APLN</i>          | apelin                                        | 5.830446 | 7.18733E-23 |
| 25976     | NM_001184717,NM_001184718,NM_015508 | <i>TIPARP</i>        | TCDD inducible poly(ADP-ribose) polymerase    | 5.819714 | 4.2338E-198 |
| 3604      | NM_001561                           | <i>TNFRSF9</i>       | TNF receptor superfamily member 9             | 5.761583 | 1.07026E-09 |
| 89884     | NM_033343                           | <i>LHX4</i>          | LIM homeobox 4                                | 5.679677 | 0.000588542 |
| 2920      | NM_002089                           | <i>CXCL2</i>         | C-X-C motif chemokine ligand 2                | 5.592997 | 6.66292E-41 |
| 6376      | NM_001304392,NM_002996              | <i>CX3CL1</i>        | C-X3-C motif chemokine ligand 1               | 5.539204 | 9.44953E-09 |
| 100533179 | NR_037904                           | <i>UBE2F-SCLY</i>    | UBE2F-SCLY readthrough (NMD candidate)        | 5.483671 | 1.21629E-06 |
| 64386     | NM_022468                           | <i>MMP25</i>         | matrix metalloproteinase 25                   | 5.431275 | 0.000200914 |
| 5328      | NM_001145031,NM_001319191,NM_002658 | <i>PLAU</i>          | plasminogen activator, urokinase              | 5.361074 | 8.87672E-22 |
| 7039      | NM_001099691,NM_00130815            | <i>TGFA</i>          | transforming growth factor alpha              | 5.055470 | 2.06805E-09 |

|           |                                                               |                  |                                                              |          |             |
|-----------|---------------------------------------------------------------|------------------|--------------------------------------------------------------|----------|-------------|
|           | 8,NM_001308159,NM_003236                                      |                  |                                                              |          |             |
| 56892     | NM_020130                                                     | <i>C8orf4</i>    | chromosome 8 open reading frame 4                            | 5.042263 | 3.56535E-12 |
| 8792      | NM_001270949,NM_001270950,NM_001270951,NM_001278268,NM_003839 | <i>TNFRSF11A</i> | TNF receptor superfamily member 11a                          | 4.977152 | 3.77375E-07 |
| 4153      | NM_000242                                                     | <i>MBL2</i>      | mannose binding lectin 2                                     | 4.976853 | 1.34404E-27 |
| 374378    | NM_198516                                                     | <i>GALNT18</i>   | polypeptide N-acetylgalactosaminyltransferase 18             | 4.964477 | 0.040497936 |
| 56112     | NM_018916,NM_032011                                           | <i>PCDHGA3</i>   | protocadherin gamma subfamily A, 3                           | 4.933845 | 0.029519018 |
| 6289      | NM_001127380,NM_030754                                        | <i>SAA2</i>      | serum amyloid A2                                             | 4.931657 | 3.35841E-14 |
| 130367    | NM_001320833,NM_001320834,NM_152386                           | <i>SGPP2</i>     | sphingosine-1-phosphate phosphatase 2                        | 4.923502 | 8.32138E-11 |
| 1435      | NM_000757,NM_172210,NM_172211,NM_172212                       | <i>CSF1</i>      | colony stimulating factor 1                                  | 4.922399 | 1.23174E-25 |
| 6752      | NM_001050                                                     | <i>SSTR2</i>     | somatostatin receptor 2                                      | 4.881280 | 5.64005E-07 |
| 30817     | NM_001271052,NM_013447                                        | <i>ADGRE2</i>    | adhesion G protein-coupled receptor E2                       | 4.764381 | 0.00032501  |
| 100271849 | NM_001145785                                                  | <i>MEF2B</i>     | myocyte enhancer factor 2B                                   | 4.762315 | 0.002738664 |
| 10186     | NM_005780                                                     | <i>LHFP</i>      | lipoma HMGIC fusion partner                                  | 4.609391 | 0.000381915 |
| 6091      | NM_001145845,NM_002941,NM_133631                              | <i>ROBO1</i>     | roundabout guidance receptor 1                               | 4.573408 | 0.000934938 |
| 8444      | NM_001004023,NM_003582                                        | <i>DYRK3</i>     | dual specificity tyrosine phosphorylation regulated kinase 3 | 4.516067 | 0.000579584 |

|           |                                                                            |                     |                                                               |          |             |
|-----------|----------------------------------------------------------------------------|---------------------|---------------------------------------------------------------|----------|-------------|
| 7477      | NM_058238                                                                  | <i>WNT7B</i>        | Wnt family member 7B                                          | 4.372204 | 5.76985E-07 |
| 125488    | NM_001135993,NM_001243425,NM_001292030,NM_153211                           | <i>TTC39C</i>       | tetratricopeptide repeat domain 39C                           | 4.295301 | 1.28414E-23 |
| 100129129 | NR_147705                                                                  | <i>LOC100129129</i> | uncharacterized LOC100129129                                  | 4.281870 | 3.23768E-05 |
| 9751      | NM_001318234,NM_014723                                                     | <i>SNPH</i>         | syntaphilin                                                   | 4.168258 | 0.002091957 |
| 57214     | NM_001293298,NM_001293304,NM_018689                                        | <i>CEMIP</i>        | cell migration inducing hyaluronan binding protein            | 4.142986 | 3.85051E-08 |
| 3754      | NM_002236                                                                  | <i>KCNF1</i>        | potassium voltage-gated channel modifier subfamily F member 1 | 3.995637 | 1.53752E-06 |
| 5239      | NM_021965                                                                  | <i>PGM5</i>         | phosphoglucomutase 5                                          | 3.987819 | 0.017809806 |
| 115811    | NM_001330452,NM_138451                                                     | <i>IQCD</i>         | IQ motif containing D                                         | 3.971746 | 7.20386E-06 |
| 827       | NM_014289                                                                  | <i>CAPN6</i>        | calpain 6                                                     | 3.954691 | 0.000483719 |
| 10170     | NM_001142270,NM_001142271,NM_001289763,NM_199204                           | <i>DHRS9</i>        | dehydrogenase/reductase 9                                     | 3.912342 | 9.16896E-09 |
| 5054      | NM_000602                                                                  | <i>SERPINE1</i>     | serpin family E member 1                                      | 3.911712 | 1.2573E-09  |
| 203190    | NM_139278                                                                  | <i>LGI3</i>         | leucine rich repeat LGI family member 3                       | 3.897524 | 0.035218552 |
| 135112    | NM_001122842,NM_001199619,NM_001199620,NM_001199621,NM_001199622,NM_181782 | <i>NCOA7</i>        | nuclear receptor coactivator 7                                | 3.757528 | 5.69906E-96 |
| 222611    | NM_153839                                                                  | <i>ADGRF2</i>       | adhesion G protein-coupled receptor F2                        | 3.664996 | 4.1548E-52  |
| 146       | NM_000678                                                                  | <i>ADRA1D</i>       | adrenoceptor alpha 1D                                         | 3.656734 | 3.14772E-06 |

|           |                                                                                                                                      |                      |                                                                       |          |             |
|-----------|--------------------------------------------------------------------------------------------------------------------------------------|----------------------|-----------------------------------------------------------------------|----------|-------------|
| 27289     | NM_014470                                                                                                                            | <i>RND1</i>          | Rho family GTPase 1                                                   | 3.613103 | 1.13986E-26 |
| 9283      | NM_004767                                                                                                                            | <i>GPR37L1</i>       | G protein-coupled receptor 37 like 1                                  | 3.605473 | 8.0249E-11  |
| 135398    | NM_001145652,NR_146853,NR_146854,NR_146855,NR_146856,NR_146857,NR_146858,NR_146859,NR_146860,NR_146861,NR_146862,NR_146863,NR_146864 | <i>C6orf141</i>      | chromosome 6 open reading frame 141                                   | 3.583108 | 4.27101E-16 |
| 12        | NM_001085                                                                                                                            | <i>SERPINA3</i>      | serpin family A member 3                                              | 3.543268 | 2.79391E-11 |
| 100240734 | NR_026657                                                                                                                            | <i>LOC100240734</i>  | uncharacterized LOC100240734                                          | 3.541523 | 0.04201445  |
| 55289     | NM_001142807                                                                                                                         | <i>ACOXL</i>         | acyl-CoA oxidase like                                                 | 3.463005 | 0.018587251 |
| 100532726 | NM_001203260,NM_001203261,NM_001203262                                                                                               | <i>NDUFC2-KCTD14</i> | NDUFC2-KCTD14 readthrough                                             | 3.455603 | 0.039983705 |
| 7474      | NM_001256105,NM_003392                                                                                                               | <i>WNT5A</i>         | Wnt family member 5A                                                  | 3.451416 | 1.03966E-05 |
| 54658     | NM_000463                                                                                                                            | <i>UGT1A1</i>        | UDP glucuronosyltransferase family 1 member A1                        | 3.440544 | 2.12265E-20 |
| 7128      | NM_001270507,NM_001270508,NM_006290                                                                                                  | <i>TNFAIP3</i>       | TNF alpha induced protein 3                                           | 3.438507 | 7.7077E-119 |
| 145837    | NR_026979                                                                                                                            | <i>DRAIC</i>         | downregulated RNA in cancer, inhibitor of cell invasion and migration | 3.417678 | 4.04033E-07 |
| 100132234 | NR_135254                                                                                                                            | <i>LINC00543</i>     | long intergenic non-protein coding RNA 543                            | 3.411526 | 4.13294E-50 |
| 574029    | NR_002834                                                                                                                            | <i>DUSP5P1</i>       | dual specificity phosphatase 5 pseudogene 1                           | 3.409071 | 4.24515E-07 |
| 3553      | NM_000576                                                                                                                            | <i>IL1B</i>          | interleukin 1 beta                                                    | 3.382881 | 0.000206638 |

|           |                                                                                               |                    |                                              |          |             |
|-----------|-----------------------------------------------------------------------------------------------|--------------------|----------------------------------------------|----------|-------------|
| 3656      | NM_001570                                                                                     | <i>IRAK2</i>       | interleukin 1 receptor associated kinase 2   | 3.363667 | 1.77017E-63 |
| 5629      | NM_001270616,NM_002763                                                                        | <i>PROX1</i>       | prospero homeobox 1                          | 3.331543 | 6.28211E-81 |
| 1958      | NM_001964                                                                                     | <i>EGR1</i>        | early growth response 1                      | 3.288240 | 4.55934E-10 |
| 57822     | NM_001195010,NM_021180,NM_198173,NM_198174                                                    | <i>GRHL3</i>       | grainyhead like transcription factor 3       | 3.280235 | 8.91267E-17 |
| 23025     | NM_001080421                                                                                  | <i>UNC13A</i>      | unc-13 homolog A                             | 3.274603 | 0.001889476 |
| 100303453 | NR_028393, NR_028394, NR_028395, NR_028396, NR_028397, NR_028398, NR_028399, NR_028400        | <i>TSNAX-DISC1</i> | TSNAX-DISC1 readthrough (NMD candidate)      | 3.208131 | 0.001016712 |
| 135644    | NM_001286633,NM_138700                                                                        | <i>TRIM40</i>      | tripartite motif containing 40               | 3.203136 | 0.00060256  |
| 7475      | NM_006522                                                                                     | <i>WNT6</i>        | Wnt family member 6                          | 3.161065 | 0.01061564  |
| 339122    | NM_001204883, NM_001204884, NM_001204885, NM_001204886, NM_001204887, NM_001204888, NM_198490 | <i>RAB43</i>       | RAB43, member RAS oncogene family            | 3.141010 | 0.019466655 |
| 10537     | NM_006398                                                                                     | <i>UBD</i>         | ubiquitin D                                  | 3.115467 | 2.42059E-28 |
| 3484      | NM_000596                                                                                     | <i>IGFBP1</i>      | insulin like growth factor binding protein 1 | 3.106487 | 2.72499E-05 |
| 23764     | NM_001161572, NM_001161573, NM_001161574, NM_012323                                           | <i>MAFF</i>        | MAF bZIP transcription factor F              | 3.070828 | 5.1732E-43  |
| 6844      | NM_001330125, NM_014232                                                                       | <i>VAMP2</i>       | vesicle associated membrane protein 2        | 3.056283 | 0.005234499 |
| 4973      | NM_001172632, NM_001172633, NM_002543                                                         | <i>OLRI</i>        | oxidized low density lipoprotein receptor 1  | 3.048117 | 2.01571E-44 |

|        |                                                            |                 |                                                                  |          |             |
|--------|------------------------------------------------------------|-----------------|------------------------------------------------------------------|----------|-------------|
| 72     | NM_001199893,NM_001615                                     | <i>ACTG2</i>    | actin, gamma 2, smooth muscle, enteric                           | 3.031186 | 0.031869792 |
| 9982   | NM_005130                                                  | <i>FGFBP1</i>   | fibroblast growth factor binding protein 1                       | 3.029162 | 3.00845E-27 |
| 340547 | NM_001170553,NM_182607                                     | <i>VSIG1</i>    | V-set and immunoglobulin domain containing 1                     | 3.022906 | 0.038373413 |
| 1846   | NM_001394,NM_057158                                        | <i>DUSP4</i>    | dual specificity phosphatase 4                                   | 2.978551 | 4.36635E-51 |
| 4884   | NM_002522                                                  | <i>NPTX1</i>    | neuronal pentraxin 1                                             | 2.938715 | 2.7988E-07  |
| 440823 | NR_003491,NR_033319,NR_03320,NR_033321                     | <i>MIAT</i>     | myocardial infarction associated transcript (non-protein coding) | 2.915714 | 0.018188129 |
| 2571   | NM_000817,NM_013445                                        | <i>GAD1</i>     | glutamate decarboxylase 1                                        | 2.865318 | 1.03802E-30 |
| 340152 | NM_207360                                                  | <i>ZC3H12D</i>  | zinc finger CCCH-type containing 12D                             | 2.848948 | 1.64121E-13 |
| 6585   | NM_003061                                                  | <i>SLIT1</i>    | slit guidance ligand 1                                           | 2.826775 | 0.003011963 |
| 5971   | NM_006509                                                  | <i>RELB</i>     | RELB proto-oncogene, NF-kB subunit                               | 2.825588 | 1.63064E-35 |
| 389384 | NM_001010903                                               | <i>C6orf222</i> | chromosome 6 open reading frame 222                              | 2.823306 | 1.62083E-43 |
| 55691  | NM_001318336,NM_001318337,NM_001318338,NM_018027,NR_134578 | <i>FRMD4A</i>   | FERM domain containing 4A                                        | 2.817286 | 8.55342E-51 |
| 93082  | NM_001285485,NM_001285486,NR_104346                        | <i>NEURL3</i>   | neuralized E3 ubiquitin protein ligase 3                         | 2.815877 | 1.28475E-16 |
| 4792   | NM_020529                                                  | <i>NFKB1A</i>   | NFkB inhibitor alpha                                             | 2.799798 | 1.67293E-75 |
| 92610  | NM_052864                                                  | <i>TIFA</i>     | TRAF interacting protein with forkhead associated domain         | 2.769515 | 6.44013E-26 |
| 56963  | NM_001166283,NM_00116628                                   | <i>RGMA</i>     | repulsive guidance molecule family member a                      | 2.765340 | 0.046018308 |



---

|        |                                                    |                |                                                                    |          |             |
|--------|----------------------------------------------------|----------------|--------------------------------------------------------------------|----------|-------------|
|        | 6,NM_001166287,NM_001166288,NM_001166289,NM_020211 |                |                                                                    |          |             |
| 6654   | NM_005633                                          | <i>SOS1</i>    | SOS Ras/Rac guanine nucleotide exchange factor 1                   | 2.747714 | 7.75898E-57 |
| 161742 | NM_152594                                          | <i>SPRED1</i>  | sprouty related EVH1 domain containing 1                           | 2.746786 | 3.61852E-30 |
| 120939 | NM_001079815,NM_153022                             | <i>TMEM52B</i> | transmembrane protein 52B                                          | 2.746062 | 1.15258E-20 |
| 8843   | NM_006018                                          | <i>HCAR3</i>   | hydroxycarboxylic acid receptor 3                                  | 2.744520 | 0.01136265  |
| 8870   | NM_003897                                          | <i>IER3</i>    | immediate early response 3                                         | 2.742145 | 1.56987E-33 |
| 4879   | NM_002521                                          | <i>NPPB</i>    | natriuretic peptide B                                              | 2.728006 | 2.77574E-05 |
| 27071  | NM_001306151,NM_014395                             | <i>DAPPI</i>   | dual adaptor of phosphotyrosine and 3-phosphoinositides 1          | 2.715616 | 0.003840461 |
| 25804  | NM_001252129,NM_012321                             | <i>LSM4</i>    | LSM4 homolog, U6 small nuclear RNA and mRNA degradation associated | 2.681507 | 0.000259124 |
| 142680 | NM_001177316,NM_001177317,NM_080877                | <i>SLC34A3</i> | solute carrier family 34 member 3                                  | 2.675429 | 0.02645684  |
| 9641   | NM_001193321,NM_001193322,NM_014002                | <i>IKBKE</i>   | inhibitor of nuclear factor kappa B kinase subunit epsilon         | 2.673090 | 5.33582E-33 |
| 3872   | NM_000422                                          | <i>KRT17</i>   | keratin 17                                                         | 2.668686 | 2.94103E-12 |
| 85462  | NM_033393                                          | <i>FHDC1</i>   | FH2 domain containing 1                                            | 2.646834 | 4.80859E-15 |
| 220    | NM_000693,NM_001293815                             | <i>ALDH1A3</i> | aldehyde dehydrogenase 1 family member A3                          | 2.591297 | 5.60411E-11 |
| 56674  | NM_001286094,NM_001286095,NM_020644                | <i>TMEM9B</i>  | TMEM9 domain family member B                                       | 2.587722 | 0.017354399 |

---

|           |                                                                            |                     |                                            |          |             |
|-----------|----------------------------------------------------------------------------|---------------------|--------------------------------------------|----------|-------------|
| 22808     | NM_001085049,NM_001252090,NM_001252091,NM_001252092,NM_001252093,NM_012219 | <i>MRAS</i>         | muscle RAS oncogene homolog                | 2.583297 | 6.73807E-07 |
| 102724084 | NR_120307                                                                  | <i>LOC102724084</i> | uncharacterized LOC102724084               | 2.576796 | 0.000334353 |
| 6367      | NM_002990                                                                  | <i>CCL22</i>        | C-C motif chemokine ligand 22              | 2.572942 | 0.047783245 |
| 685       | NM_001316963,NM_001729                                                     | <i>BTC</i>          | betacellulin                               | 2.572600 | 0.000207781 |
| 338442    | NM_177551                                                                  | <i>HCAR2</i>        | hydroxycarboxylic acid receptor 2          | 2.562473 | 0.020853273 |
| 51284     | NM_016562                                                                  | <i>TLR7</i>         | toll like receptor 7                       | 2.555552 | 0.004359017 |
| 65989     | NM_001286655,NM_001286656,NM_023932,NM_206539                              | <i>DLK2</i>         | delta like non-canonical Notch ligand 2    | 2.553783 | 0.008280256 |
| 84847     | NR_038407                                                                  | <i>LINC00525</i>    | long intergenic non-protein coding RNA 525 | 2.552726 | 0.029880052 |
| 7127      | NM_006291                                                                  | <i>TNFAIP2</i>      | TNF alpha induced protein 2                | 2.551546 | 7.04546E-13 |
| 405753    | NM_207581                                                                  | <i>DUOXA2</i>       | dual oxidase maturation factor 2           | 2.540025 | 1.44822E-06 |
| 29947     | NM_013369,NM_175867                                                        | <i>DNMT3L</i>       | DNA methyltransferase 3 like               | 2.539188 | 0.008752878 |
| 138065    | NM_145051                                                                  | <i>RNF183</i>       | ring finger protein 183                    | 2.531477 | 0.000909853 |
| 158158    | NM_152573                                                                  | <i>RASEF</i>        | RAS and EF-hand domain containing          | 2.524432 | 0.029070882 |
| 8538      | NM_003658                                                                  | <i>BARX2</i>        | BARX homeobox 2                            | 2.523899 | 0.002024079 |
| 54873     | NM_017734                                                                  | <i>PALMD</i>        | palmdelphin                                | 2.512094 | 0.001187407 |
| 100133205 | NR_026775                                                                  | <i>LINC00240</i>    | long intergenic non-protein coding RNA 240 | 2.511926 | 0.032061195 |

|           |                                                                                                                             |                  |                                                      |          |             |
|-----------|-----------------------------------------------------------------------------------------------------------------------------|------------------|------------------------------------------------------|----------|-------------|
| 80149     | NM_001323550,NM_001323551,NM_025079                                                                                         | <i>ZC3H12A</i>   | zinc finger CCCH-type containing 12A                 | 2.509189 | 2.18643E-25 |
| 647033    | NR_003284                                                                                                                   | <i>PA2G4P4</i>   | proliferation-associated 2G4 pseudogene 4            | 2.503145 | 7.32513E-06 |
| 3934      | NM_005564                                                                                                                   | <i>LCN2</i>      | lipocalin 2                                          | 2.499087 | 0.021412644 |
| 23034     | NM_001161576,NM_001161577,NM_015589                                                                                         | <i>SAMD4A</i>    | sterile alpha motif domain containing 4A             | 2.470770 | 0.004310303 |
| 25780     | NM_001139488,NM_001349975,NM_001349976,NM_001349977,NM_001349978,NM_001349979,NM_001349980,NM_001349981,NM_015376,NM_170672 | <i>RASGRP3</i>   | RAS guanyl releasing protein 3                       | 2.466611 | 5.89717E-13 |
| 9953      | NM_006041,NR_130138                                                                                                         | <i>HS3ST3B1</i>  | heparan sulfate-glucosamine 3-sulfotransferase 3B1   | 2.440158 | 0.008551736 |
| 100499467 | NR_036488,NR_137280,NR_137281                                                                                               | <i>LINC00673</i> | long intergenic non-protein coding RNA 673           | 2.437728 | 2.24695E-34 |
| 3708      | NM_001099952,NM_001168272,NM_002222                                                                                         | <i>ITPR1</i>     | inositol 1,4,5-trisphosphate receptor type 1         | 2.435095 | 1.0744E-09  |
| 5055      | NM_001143818,NM_002575                                                                                                      | <i>SERPINB2</i>  | serpin family B member 2                             | 2.432125 | 0.019790527 |
| 64150     | NR_002770                                                                                                                   | <i>DIO3OS</i>    | DIO3 opposite strand/antisense RNA (head to head)    | 2.431530 | 1.70251E-06 |
| 401022    | NR_033979,NR_110458,NR_110459,NR_110460,NR_110461,NR_110462,NR_110463,NR_110464,NR_110465,NR_110466,N                       | <i>HAGLR</i>     | HOXD antisense growth-associated long non-coding RNA | 2.430127 | 0.002512305 |

|           |                                                                                         |                      |                                                                |          |             |
|-----------|-----------------------------------------------------------------------------------------|----------------------|----------------------------------------------------------------|----------|-------------|
|           | R_110467,NR_110468                                                                      |                      |                                                                |          |             |
| 23120     | NM_025153                                                                               | <i>ATP10B</i>        | ATPase phospholipid transporting 10B (putative)                | 2.422210 | 5.81828E-21 |
| 6776      | NM_001288718,NM_001288719,NM_001288720,NM_003152                                        | <i>STAT5A</i>        | signal transducer and activator of transcription 5A            | 2.420622 | 2.46602E-13 |
| 84807     | NM_001321831,NM_139239                                                                  | <i>NFKBID</i>        | NFkB inhibitor delta                                           | 2.409030 | 2.23266E-08 |
| 85027     | NM_032947                                                                               | <i>SMIM3</i>         | small integral membrane protein 3                              | 2.407382 | 5.64489E-36 |
| 1959      | NM_000399,NM_001136177,NM_001136178,NM_001136179,NM_001321037                           | <i>EGR2</i>          | early growth response 2                                        | 2.406854 | 0.011301735 |
| 100529063 | NM_001199864                                                                            | <i>BCL2L2-PABPN1</i> | BCL2L2-PABPN1 readthrough                                      | 2.404173 | 0.035095724 |
| 131601    | NM_001136053,NM_001142646,NR_073377                                                     | <i>TPRA1</i>         | transmembrane protein adipocyte associated 1                   | 2.396376 | 3.13055E-46 |
| 9429      | NM_001257386,NM_001348985,NM_001348986,NM_001348987,NM_001348988,NM_001348989,NM_004827 | <i>ABCG2</i>         | ATP binding cassette subfamily G member 2 (Junior blood group) | 2.393271 | 6.76119E-30 |
| 389170    | NM_001004316,NM_001193283                                                               | <i>LEKRI</i>         | leucine, glutamate and lysine rich 1                           | 2.383712 | 0.014398694 |
| 6274      | NM_002960                                                                               | <i>S100A3</i>        | S100 calcium binding protein A3                                | 2.380431 | 0.035823746 |
| 4843      | NM_000625                                                                               | <i>NOS2</i>          | nitric oxide synthase 2                                        | 2.379397 | 3.99473E-30 |
| 149465    | NM_001167965,NM_001195831,NM_152498                                                     | <i>CFAP57</i>        | cilia and flagella associated protein 57                       | 2.377490 | 0.018565826 |
| 105372833 | NR_135514                                                                               | <i>LOC105372833</i>  | uncharacterized LOC105372833                                   | 2.376260 | 1.44974E-05 |

|           |                                                                                                |                 |                                                         |          |             |
|-----------|------------------------------------------------------------------------------------------------|-----------------|---------------------------------------------------------|----------|-------------|
| 245972    | NM_152565                                                                                      | <i>ATP6V0D2</i> | ATPase H <sup>+</sup> transporting V0 subunit d2        | 2.373291 | 4.75498E-10 |
| 2353      | NM_005252                                                                                      | <i>FOS</i>      | Fos proto-oncogene, AP-1 transcription factor subunit   | 2.360830 | 6.23805E-23 |
| 54997     | NM_001168325,NM_017899,NR_031766                                                               | <i>TESC</i>     | tescalcin                                               | 2.360748 | 5.31983E-06 |
| 1009      | NM_001308392,NM_001330576,NM_001797                                                            | <i>CDH11</i>    | cadherin 11                                             | 2.358787 | 2.17383E-05 |
| 6004      | NM_002928                                                                                      | <i>RGS16</i>    | regulator of G protein signaling 16                     | 2.345610 | 0.000347529 |
| 8061      | NM_001300844,NM_001300855,NM_001300856,NM_001300857,NM_005438,NR_125339                        | <i>FOSL1</i>    | FOS like 1, AP-1 transcription factor subunit           | 2.343730 | 4.92036E-11 |
| 1827      | NM_001285389,NM_001285391,NM_001285392,NM_001285393,NM_001331016,NM_004414,NM_203417,NM_203418 | <i>RCAN1</i>    | regulator of calcineurin 1                              | 2.342425 | 6.82493E-49 |
| 64221     | NM_022370                                                                                      | <i>ROBO3</i>    | roundabout guidance receptor 3                          | 2.333417 | 0.012529228 |
| 104472715 | NR_146177                                                                                      | <i>SNHG14</i>   | small nucleolar RNA host gene 14                        | 2.332958 | 0.000161021 |
| 319       | NM_001638                                                                                      | <i>APOF</i>     | apolipoprotein F                                        | 2.330319 | 0.047162013 |
| 8140      | NM_003486                                                                                      | <i>SLC7A5</i>   | solute carrier family 7 member 5                        | 2.322804 | 7.18676E-84 |
| 374       | NM_001657,NM_001657_dup1                                                                       | <i>AREG</i>     | amphiregulin                                            | 2.314708 | 4.37814E-39 |
| 54757     | NM_001243746,NM_017565,NR_027751                                                               | <i>FAM20A</i>   | FAM20A, golgi associated secretory pathway pseudokinase | 2.305631 | 9.86224E-17 |
| 4698      | NM_001282419,NM_00128242                                                                       | <i>NDUFA5</i>   | NADH:ubiquinone oxidoreductase subunit A5               | 2.301338 | 0.034929114 |

|       |                                                                                                                                                                                               |                |                                        |          |             |
|-------|-----------------------------------------------------------------------------------------------------------------------------------------------------------------------------------------------|----------------|----------------------------------------|----------|-------------|
|       | 0,NM_001282421,NM_001282422,NM_001291304,NM_005000,NR_104168,NR_104169,NR_111925,NR_111926                                                                                                    |                |                                        |          |             |
| 57538 | NM_020778                                                                                                                                                                                     | <i>ALPK3</i>   | alpha kinase 3                         | 2.300113 | 8.51431E-05 |
| 57491 | NM_001242412,NM_020731                                                                                                                                                                        | <i>AHRR</i>    | aryl-hydrocarbon receptor repressor    | 2.290064 | 1.3321E-05  |
| 80117 | NM_025047                                                                                                                                                                                     | <i>ARL14</i>   | ADP ribosylation factor like GTPase 14 | 2.286307 | 2.81805E-15 |
| 84239 | NM_032279                                                                                                                                                                                     | <i>ATP13A4</i> | ATPase 13A4                            | 2.282577 | 0.004833661 |
| 2172  | NM_001040442,NM_001130958,NM_001445                                                                                                                                                           | <i>FABP6</i>   | fatty acid binding protein 6           | 2.255570 | 0.014950897 |
| 22806 | NM_001257408,NM_001257409,NM_001257410,NM_001257411,NM_001257412,NM_001257413,NM_001257414,NM_001284514,NM_001284515,NM_001284516,NM_012481,NM_183228,NM_183229,NM_183230,NM_183231,NM_183232 | <i>IKZF3</i>   | IKAROS family zinc finger 3            | 2.244544 | 0.002804071 |
| 3383  | NM_000201                                                                                                                                                                                     | <i>ICAM1</i>   | intercellular adhesion molecule 1      | 2.240086 | 9.38044E-43 |
| 83697 | NM_001258426,NM_001258427,NM_001258428,NM_031467                                                                                                                                              | <i>SLC4A9</i>  | solute carrier family 4 member 9       | 2.228717 | 0.03009497  |
| 6036  | NM_002934                                                                                                                                                                                     | <i>RNASE2</i>  | ribonuclease A family member 2         | 2.222510 | 0.00024295  |
| 5581  | NM_005400                                                                                                                                                                                     | <i>PRKCE</i>   | protein kinase C epsilon               | 2.212503 | 4.73436E-08 |
| 29995 | NM_001278233,NM_00127823                                                                                                                                                                      | <i>LMCD1</i>   | LIM and cysteine rich domains 1        | 2.212136 | 8.6856E-16  |

|       |                                                               |                |                                                 |          |             |
|-------|---------------------------------------------------------------|----------------|-------------------------------------------------|----------|-------------|
|       | 4,NM_001278235,NM_014583                                      |                |                                                 |          |             |
| 25841 | NM_145804                                                     | <i>ABTB2</i>   | ankyrin repeat and BTB domain containing 2      | 2.203196 | 1.03409E-30 |
| 767   | NM_001321837,NM_001321838,NM_001321839,NM_004056,NR_135821    | <i>CA8</i>     | carbonic anhydrase 8                            | 2.198790 | 7.11158E-10 |
| 54361 | NM_030761                                                     | <i>WNT4</i>    | Wnt family member 4                             | 2.194233 | 0.000172976 |
| 602   | NM_005178                                                     | <i>BCL3</i>    | B-cell CLL/lymphoma 3                           | 2.190791 | 6.44962E-35 |
| 23308 | NM_001283050,NM_001283051,NM_001283052,NM_015259              | <i>ICOSLG</i>  | inducible T-cell costimulator ligand            | 2.187852 | 1.49475E-29 |
| 80153 | NM_001142443,NM_001142444,NM_001351378,NM_001351379,NM_025083 | <i>EDC3</i>    | enhancer of mRNA decapping 3                    | 2.176841 | 6.68105E-61 |
| 1848  | NM_001946,NM_022652                                           | <i>DUSP6</i>   | dual specificity phosphatase 6                  | 2.168106 | 3.27558E-44 |
| 1839  | NM_001945                                                     | <i>HBEGF</i>   | heparin binding EGF like growth factor          | 2.157453 | 5.42064E-14 |
| 55022 | NM_001100818,NM_001330156,NM_001330157,NM_001330158,NM_017933 | <i>PID1</i>    | phosphotyrosine interaction domain containing 1 | 2.147579 | 0.044422635 |
| 6330  | NM_001142348,NM_001142349,NM_174934,NR_024527                 | <i>SCN4B</i>   | sodium voltage-gated channel beta subunit 4     | 2.143185 | 0.000213696 |
| 2113  | NM_001143820,NM_001162422,NM_001330451,NM_005238              | <i>ETS1</i>    | ETS proto-oncogene 1, transcription factor      | 2.136900 | 1.10592E-09 |
| 91768 | NM_001100619,NM_001256438,NM_138375,NR_023359                 | <i>CABLES1</i> | Cdk5 and Abl enzyme substrate 1                 | 2.132428 | 1.30246E-39 |

|       |                                                                            |                |                                                   |          |             |
|-------|----------------------------------------------------------------------------|----------------|---------------------------------------------------|----------|-------------|
| 1235  | NM_004367,NM_031409                                                        | <i>CCR6</i>    | C-C motif chemokine receptor 6                    | 2.127072 | 0.000380748 |
| 22822 | NM_007350                                                                  | <i>PHLDA1</i>  | pleckstrin homology like domain family A member 1 | 2.124608 | 1.45448E-27 |
| 9506  | NM_001318877,NM_007003                                                     | <i>PAGE4</i>   | PAGE family member 4                              | 2.122817 | 2.09136E-05 |
| 10228 | NM_001286210,NM_005819                                                     | <i>STX6</i>    | syntaxin 6                                        | 2.117213 | 0.029830883 |
| 3659  | NM_002198                                                                  | <i>IRF1</i>    | interferon regulatory factor 1                    | 2.111544 | 7.13336E-26 |
| 30811 | NM_014586                                                                  | <i>HUNK</i>    | hormonally up-regulated Neu-associated kinase     | 2.111345 | 1.53856E-09 |
| 1410  | NM_001289807,NM_001289808,NM_001330379,NM_001885                           | <i>CRYAB</i>   | crystallin alpha B                                | 2.107352 | 0.002054252 |
| 4791  | NM_001077494,NM_001261403,NM_001288724,NM_001322934,NM_001322935,NM_002502 | <i>NFKB2</i>   | nuclear factor kappa B subunit 2                  | 2.090694 | 3.58852E-37 |
| 2706  | NM_004004                                                                  | <i>GJB2</i>    | gap junction protein beta 2                       | 2.088922 | 6.18675E-07 |
| 10263 | NM_001271849,NM_005851,NR_073484                                           | <i>CDK2AP2</i> | cyclin dependent kinase 2 associated protein 2    | 2.075197 | 2.99635E-49 |
| 5021  | NM_000916                                                                  | <i>OXTR</i>    | oxytocin receptor                                 | 2.074052 | 6.65368E-05 |
| 84959 | NM_032873                                                                  | <i>UBASH3B</i> | ubiquitin associated and SH3 domain containing B  | 2.071488 | 9.09189E-18 |
| 79827 | NM_024769                                                                  | <i>CLMP</i>    | CXADR like membrane protein                       | 2.064487 | 0.030992872 |
| 57210 | NM_001080431,NM_001286646,NM_001286648                                     | <i>SLC45A4</i> | solute carrier family 45 member 4                 | 2.055459 | 0.000618996 |



|        |                                                                                         |                |                                              |                                |             |
|--------|-----------------------------------------------------------------------------------------|----------------|----------------------------------------------|--------------------------------|-------------|
| 11182  | NM_001145099,NM_017585                                                                  | <i>SLC2A6</i>  | solute carrier family 2 member 6             | 2.053969                       | 1.76872E-14 |
| 768239 | NM_001085382                                                                            | <i>PSAPL1</i>  | prosaposin-like 1 (gene/pseudogene)          | 2.053785                       | 2.51527E-23 |
| 218    | NM_000691,NM_001135167,NM_001135168,NM_001330150                                        | <i>ALDH3A1</i> | aldehyde dehydrogenase 3 family member A1    | 2.051472                       | 0.000375005 |
| 55521  | NM_001017397,NM_001017398,NM_001300752,NM_001300759,NM_018700                           | <i>TRIM36</i>  | tripartite motif containing 36               | 2.051419                       | 0.010848952 |
| 6898   | NM_000353                                                                               | <i>TAT</i>     | tyrosine aminotransferase                    | 2.050106                       | 0.012625027 |
| 2254   | NM_002010                                                                               | <i>FGF9</i>    | fibroblast growth factor 9                   | 2.048731                       | 0.001481173 |
| 116496 | NM_052966                                                                               | <i>FAM129A</i> | family with sequence similarity 129 member A | 2.023770                       | 0.020192992 |
| 653464 | NM_001271872,NM_001329984                                                               | <i>SRGAP2C</i> | SLIT-ROBO Rho GTPase activating protein 2C   | 2.015556                       | 0.002032153 |
| 220108 | NM_001242312,NM_001330522,NM_145019                                                     | <i>FAM124A</i> | family with sequence similarity 124 member A | 2.006403                       | 0.000835411 |
| 79616  | NM_001308173,NM_024565,NR_131769                                                        | <i>CCNJL</i>   | cyclin J like                                | 2.005526                       | 2.20895E-39 |
| 4208   | NM_001131005,NM_001193347,NM_001193348,NM_001193349,NM_001193350,NM_001308002,NM_002397 | <i>MEF2C</i>   | myocyte enhancer factor 2C                   | 2.004788                       | 0.002499408 |
| 284161 | NM_001165993,NM_001165994,NM_182569                                                     | <i>GDPD1</i>   | glycerophosphodiester domain containing 1    | phosphodiesterase<br>-2.005585 | 0.01303733  |
| 6856   | NM_006754,NM_182715                                                                     | <i>SYPL1</i>   | synaptophysin like 1                         | -2.056184                      | 0.042184811 |

|           |                                                                                                                                                                                                               |                     |                                               |           |             |
|-----------|---------------------------------------------------------------------------------------------------------------------------------------------------------------------------------------------------------------|---------------------|-----------------------------------------------|-----------|-------------|
| 375616    | NM_001135914,NM_199349                                                                                                                                                                                        | <i>KCP</i>          | kielin/chordin-like protein                   | -2.068429 | 0.029764903 |
| 6638      | NM_001349454,NM_001349455,NM_001349456,NM_001349457,NM_001349458,NM_001349459,NM_001349460,NM_001349461,NM_001349462,NM_001349463,NM_001349464,NM_001349465,NM_003097,NM_022805,NM_022806,NM_022807,NM_022808 | <i>SNRPN</i>        | small nuclear ribonucleoprotein polypeptide N | -2.078321 | 0.005664251 |
| 81031     | NM_030777                                                                                                                                                                                                     | <i>SLC2A10</i>      | solute carrier family 2 member 10             | -2.138168 | 0.046967119 |
| 101928865 | NR_120564                                                                                                                                                                                                     | <i>LOC101928865</i> | uncharacterized LOC101928865                  | -2.168415 | 0.046498353 |
| 11248     | NM_007225                                                                                                                                                                                                     | <i>NXPH3</i>        | neurexophilin 3                               | -2.173053 | 0.000406926 |
| 10451     | NM_001079874,NM_006113                                                                                                                                                                                        | <i>VAV3</i>         | vav guanine nucleotide exchange factor 3      | -2.190234 | 2.46399E-12 |
| 107985781 | NR_144453,NR_144454                                                                                                                                                                                           | <i>FSIP2-AS1</i>    | FSIP2 antisense RNA 1                         | -2.261266 | 0.030835302 |
| 644714    | NR_033947                                                                                                                                                                                                     | <i>LIMD1-AS1</i>    | LIMD1 antisense RNA 1                         | -2.301933 | 0.010878452 |
| 1903      | NM_005226                                                                                                                                                                                                     | <i>SIPR3</i>        | sphingosine-1-phosphate receptor 3            | -2.351274 | 0.008415378 |
| 25903     | NM_001297713,NM_001347700,NM_015441                                                                                                                                                                           | <i>OLFML2B</i>      | olfactomedin like 2B                          | -2.410259 | 0.016652944 |
| 7277      | NM_001278552,NM_006000                                                                                                                                                                                        | <i>TUBA4A</i>       | tubulin alpha 4a                              | -2.429044 | 0.015382476 |
| 148418    | NM_001010971,NM_001134663,NM_001134664                                                                                                                                                                        | <i>SAMD13</i>       | sterile alpha motif domain containing 13      | -2.447818 | 0.039957097 |
| 169841    | NM_001301275,NM_003448,N                                                                                                                                                                                      | <i>ZNF169</i>       | zinc finger protein 169                       | -2.565838 | 6.76084E-06 |

|           |                                                                            |                            |                                                            |           |             |
|-----------|----------------------------------------------------------------------------|----------------------------|------------------------------------------------------------|-----------|-------------|
|           | M_194320                                                                   |                            |                                                            |           |             |
| 29993     | NM_001199583,NM_020804                                                     | <i>PACSN1</i>              | protein kinase C and casein kinase substrate in neurons 1  | -2.605199 | 0.029939416 |
| 727896    | NR_026659                                                                  | <i>LOC727896</i>           | cysteine and histidine rich domain containing 1 pseudogene | -2.625021 | 0.00141677  |
| 107080638 | NM_001318809,NR_134872                                                     | <i>TBC1D7-LOC100130357</i> | TBC1D7-LOC100130357 readthrough                            | -2.753368 | 0.017207475 |
| 100526832 | NM_001199290,NR_144936                                                     | <i>PHOSPHO2-KLHL23</i>     | PHOSPHO2-KLHL23 readthrough                                | -2.806763 | 0.038904849 |
| 101927157 | NR_125879                                                                  | <i>LOC101927157</i>        | uncharacterized LOC101927157                               | -2.845245 | 0.025244643 |
| 56256     | NM_019605                                                                  | <i>SERTAD4</i>             | SERTA domain containing 4                                  | -2.965962 | 0.01552691  |
| 1795      | NM_004947                                                                  | <i>DOCK3</i>               | dedicator of cytokinesis 3                                 | -2.967732 | 0.035192958 |
| 101929140 | NR_120423                                                                  | <i>LOC101929140</i>        | uncharacterized LOC101929140                               | -3.034141 | 0.046480615 |
| 90586     | NR_002773                                                                  | <i>AOC4P</i>               | amine oxidase, copper containing 4, pseudogene             | -3.055845 | 0.012367669 |
| 4622      | NM_017533                                                                  | <i>MYH4</i>                | myosin heavy chain 4                                       | -3.088172 | 0.034090663 |
| 4345      | NM_001004196,NM_001318826,NM_001318828,NM_001318830,NM_005944              | <i>CD200</i>               | CD200 molecule                                             | -3.152908 | 0.012684179 |
| 100506084 | NM_001039083,NM_001103154,NM_001330240,NM_001330240_dup1,NM_001330240_dup2 | <i>ARL17B</i>              | ADP ribosylation factor like GTPase 17B                    | -3.913194 | 3.25137E-08 |
| 100861412 | NM_001256141                                                               | <i>FSBP</i>                | fibrinogen silencer binding protein                        | -4.049103 | 0.022774495 |

|           |                                                               |                     |                                                           |            |             |
|-----------|---------------------------------------------------------------|---------------------|-----------------------------------------------------------|------------|-------------|
| 3910      | NM_001105206,NM_001105207,NM_001105208,NM_001105209,NM_002290 | <i>LAMA4</i>        | laminin subunit alpha 4                                   | -4.063789  | 0.009381453 |
| 84694     | NM_032602                                                     | <i>GJA10</i>        | gap junction protein alpha 10                             | -4.404354  | 0.016114064 |
| 407975    | NR_027349,NR_027350                                           | <i>MIR17HG</i>      | miR-17-92a-1 cluster host gene                            | -5.776073  | 2.86063E-05 |
| 100526767 | NM_001198954                                                  | <i>RNF103-CHMP3</i> | RNF103-CHMP3 readthrough                                  | -7.685068  | 1.50443E-05 |
| 140564    | NM_152426                                                     | <i>APOBEC3D</i>     | apolipoprotein B mRNA editing enzyme catalytic subunit 3D | -10.607301 | 7.10005E-12 |
| 54065     | NM_058182                                                     | <i>SMIM11A</i>      | small integral membrane protein 11A                       | -13.233948 | 0.008295283 |
| 100616394 | NR_039646_chr2,NR_039646_chr3                                 | <i>MIR4444-1</i>    | microRNA 4444-1                                           | -62.447699 | 2.97884E-10 |
| 100846999 | NR_049831_chr2,NR_049831_chr3                                 | <i>MIR4444-2</i>    | microRNA 4444-2                                           | -90.594034 | 3.49878E-07 |

**Table S4.** List of differentially expressed genes between CotG-p75-stimulated and wild-type spore-stimulated Caco-2 cells.

| Gene ID   | Transcript ID                       | Gene Symbol         | Description                                                  | Fold change | Raw <i>p</i> -val |
|-----------|-------------------------------------|---------------------|--------------------------------------------------------------|-------------|-------------------|
| 100533179 | NR_037904                           | <i>UBE2F-SCLY</i>   | UBE2F-SCLY readthrough (NMD candidate)                       | 41.599007   | 2.23091E-17       |
| 1543      | NM_000499,NM_001319216,NM_001319217 | <i>CYP1A1</i>       | cytochrome P450 family 1 subfamily A member 1                | 8.592991    | 0                 |
| 3627      | NM_001565                           | <i>CXCL10</i>       | C-X-C motif chemokine ligand 10                              | 8.247557    | 1.73586E-25       |
| 6364      | NM_001130046,NM_004591              | <i>CCL20</i>        | C-C motif chemokine ligand 20                                | 8.098661    | 1.3334E-269       |
| 8444      | NM_001004023,NM_003582              | <i>DYRK3</i>        | dual specificity tyrosine phosphorylation regulated kinase 3 | 6.953617    | 2.50561E-06       |
| 3576      | NM_000584                           | <i>CXCL8</i>        | C-X-C motif chemokine ligand 8                               | 6.915316    | 3.94676E-26       |
| 1545      | NM_000104                           | <i>CYP1B1</i>       | cytochrome P450 family 1 subfamily B member 1                | 6.511592    | 6.0171E-79        |
| 100137049 | NM_001114633                        | <i>PLA2G4B</i>      | phospholipase A2 group IVB                                   | 6.120328    | 0.031872324       |
| 330       | NM_001165,NM_182962                 | <i>BIRC3</i>        | baculoviral IAP repeat containing 3                          | 6.093163    | 7.4151E-151       |
| 2919      | NM_001511,NR_046035                 | <i>CXCL1</i>        | C-X-C motif chemokine ligand 1                               | 5.854843    | 2.64117E-21       |
| 2770      | NM_001256414,NM_002069              | <i>GNAIL</i>        | G protein subunit alpha i1                                   | 5.726312    | 2.30508E-07       |
| 25976     | NM_001184717,NM_001184718,NM_015508 | <i>TIPARP</i>       | TCDD inducible poly(ADP-ribose) polymerase                   | 5.684022    | 6.8335E-238       |
| 100129129 | NR_147705                           | <i>LOC100129129</i> | uncharacterized LOC100129129                                 | 5.631024    | 5.96922E-08       |
| 146       | NM_000678                           | <i>ADRA1D</i>       | adrenoceptor alpha 1D                                        | 5.380459    | 6.78846E-11       |
| 2921      | NM_002090                           | <i>CXCL3</i>        | C-X-C motif chemokine ligand 3                               | 5.145310    | 3.67022E-42       |

|        |                                                  |                 |                                                               |          |             |
|--------|--------------------------------------------------|-----------------|---------------------------------------------------------------|----------|-------------|
| 9751   | NM_001318234,NM_014723                           | <i>SNPH</i>     | syntaphilin                                                   | 5.044871 | 0.000121779 |
| 8862   | NM_017413                                        | <i>APLN</i>     | apelin                                                        | 4.968855 | 2.56267E-24 |
| 157739 | NR_001578                                        | <i>TDH</i>      | L-threonine dehydrogenase (pseudogene)                        | 4.847489 | 8.61668E-05 |
| 4153   | NM_000242                                        | <i>MBL2</i>     | mannose binding lectin 2                                      | 4.577801 | 1.03006E-31 |
| 57214  | NM_001293298,NM_001293304,NM_018689              | <i>CEMIP</i>    | cell migration inducing hyaluronan binding protein            | 4.437332 | 1.28742E-10 |
| 222611 | NM_153839                                        | <i>ADGRF2</i>   | adhesion G protein-coupled receptor F2                        | 4.409306 | 9.89236E-81 |
| 6376   | NM_001304392,NM_002996                           | <i>CX3CL1</i>   | C-X3-C motif chemokine ligand 1                               | 4.301910 | 1.69932E-08 |
| 7039   | NM_001099691,NM_001308158,NM_001308159,NM_003236 | <i>TGFA</i>     | transforming growth factor alpha                              | 4.242098 | 2.21449E-09 |
| 1767   | NM_001369                                        | <i>DNAH5</i>    | dynein axonemal heavy chain 5                                 | 4.109003 | 0.002552756 |
| 5328   | NM_001145031,NM_001319191,NM_002658              | <i>PLAU</i>     | plasminogen activator, urokinase                              | 4.099523 | 4.56426E-20 |
| 30817  | NM_001271052,NM_013447                           | <i>ADGRE2</i>   | adhesion G protein-coupled receptor E2                        | 4.072615 | 0.000224211 |
| 56892  | NM_020130                                        | <i>C8orf4</i>   | chromosome 8 open reading frame 4                             | 3.930674 | 2.83578E-11 |
| 5055   | NM_001143818,NM_002575                           | <i>SERPINB2</i> | serpin family B member 2                                      | 3.864791 | 0.000200576 |
| 4884   | NM_002522                                        | <i>NPTX1</i>    | neuronal pentraxin 1                                          | 3.717525 | 5.16782E-12 |
| 2920   | NM_002089                                        | <i>CXCL2</i>    | C-X-C motif chemokine ligand 2                                | 3.691396 | 4.72124E-31 |
| 3754   | NM_002236                                        | <i>KCNF1</i>    | potassium voltage-gated channel modifier subfamily F member 1 | 3.657794 | 4.51532E-07 |
| 203190 | NM_139278                                        | <i>LGI3</i>     | leucine rich repeat LGI family member 3                       | 3.603554 | 0.02580597  |
| 64386  | NM_022468                                        | <i>MMP25</i>    | matrix metalloproteinase 25                                   | 3.539046 | 0.001484963 |

|           |                                                                            |                     |                                                         |          |             |
|-----------|----------------------------------------------------------------------------|---------------------|---------------------------------------------------------|----------|-------------|
| 107303344 | NM_001320727,NR_135324                                                     | <i>SETDB2-PHF11</i> | SETDB2-PHF11 readthrough                                | 3.504963 | 0.001045233 |
| 10170     | NM_001142270,NM_001142271,NM_001289763,NM_199204                           | <i>DHRS9</i>        | dehydrogenase/reductase 9                               | 3.493099 | 6.31444E-09 |
| 56961     | NM_020209                                                                  | <i>SHD</i>          | Src homology 2 domain containing transforming protein D | 3.426606 | 0.001619291 |
| 135112    | NM_001122842,NM_001199619,NM_001199620,NM_001199621,NM_001199622,NM_181782 | <i>NCOA7</i>        | nuclear receptor coactivator 7                          | 3.419905 | 1.9313E-102 |
| 125488    | NM_001135993,NM_001243425,NM_001292030,NM_153211                           | <i>TTC39C</i>       | tetratricopeptide repeat domain 39C                     | 3.345688 | 6.39928E-21 |
| 4837      | NM_006169                                                                  | <i>NNMT</i>         | nicotinamide N-methyltransferase                        | 3.295695 | 0.016270772 |
| 3708      | NM_001099952,NM_001168272,NM_002222                                        | <i>ITPR1</i>        | inositol 1,4,5-trisphosphate receptor type 1            | 3.293136 | 7.47749E-19 |
| 9308      | NM_001040280,NM_001251901,NM_004233                                        | <i>CD83</i>         | CD83 molecule                                           | 3.214823 | 5.78202E-11 |
| 135644    | NM_001286633,NM_138700                                                     | <i>TRIM40</i>       | tripartite motif containing 40                          | 3.204277 | 0.000157358 |
| 3604      | NM_001561                                                                  | <i>TNFRSF9</i>      | TNF receptor superfamily member 9                       | 3.166664 | 2.02967E-06 |
| 8792      | NM_001270949,NM_001270950,NM_001270951,NM_001278268,NM_003839              | <i>TNFRSF11A</i>    | TNF receptor superfamily member 11a                     | 3.143917 | 2.60427E-05 |
| 57491     | NM_001242412,NM_020731                                                     | <i>AHRR</i>         | aryl-hydrocarbon receptor repressor                     | 3.104681 | 7.82136E-11 |
| 115811    | NM_001330452,NM_138451                                                     | <i>IQCD</i>         | IQ motif containing D                                   | 3.090306 | 3.50443E-05 |
| 65989     | NM_001286655,NM_001286656,NM_023932,NM_206539                              | <i>DLK2</i>         | delta like non-canonical Notch ligand 2                 | 3.078482 | 0.000497401 |

|           |                                                                                                                                      |                      |                                                    |          |             |
|-----------|--------------------------------------------------------------------------------------------------------------------------------------|----------------------|----------------------------------------------------|----------|-------------|
| 1958      | NM_001964                                                                                                                            | <i>EGR1</i>          | early growth response 1                            | 3.034575 | 1.05852E-10 |
| 1846      | NM_001394,NM_057158                                                                                                                  | <i>DUSP4</i>         | dual specificity phosphatase 4                     | 3.030126 | 2.81015E-64 |
| 26166     | NM_001286692,NM_001286693,NM_015668                                                                                                  | <i>RGS22</i>         | regulator of G protein signaling 22                | 3.019214 | 0.003648883 |
| 1435      | NM_000757,NM_172210,NM_172211,NM_172212                                                                                              | <i>CSF1</i>          | colony stimulating factor 1                        | 3.013399 | 2.77182E-17 |
| 135398    | NM_001145652,NR_146853,NR_146854,NR_146855,NR_146856,NR_146857,NR_146858,NR_146859,NR_146860,NR_146861,NR_146862,NR_146863,NR_146864 | <i>C6orf141</i>      | chromosome 6 open reading frame 141                | 2.982983 | 7.17801E-15 |
| 3484      | NM_000596                                                                                                                            | <i>IGFBP1</i>        | insulin like growth factor binding protein 1       | 2.973367 | 7.5434E-06  |
| 5629      | NM_001270616,NM_002763                                                                                                               | <i>PROX1</i>         | prospero homeobox 1                                | 2.958410 | 3.20709E-82 |
| 6654      | NM_005633                                                                                                                            | <i>SOS1</i>          | SOS Ras/Rac guanine nucleotide exchange factor 1   | 2.935131 | 9.661E-79   |
| 220       | NM_000693,NM_001293815                                                                                                               | <i>ALDH1A3</i>       | aldehyde dehydrogenase 1 family member A3          | 2.923598 | 2.85371E-16 |
| 100533970 | NR_037928                                                                                                                            | <i>P2RX5-TAX1BP3</i> | P2RX5-TAX1BP3 readthrough (NMD candidate)          | 2.892283 | 0.023672889 |
| 255239    | NM_178510                                                                                                                            | <i>ANKK1</i>         | ankyrin repeat and kinase domain containing 1      | 2.890317 | 0.000895666 |
| 9953      | NM_006041,NR_130138                                                                                                                  | <i>HS3ST3B1</i>      | heparan sulfate-glucosamine 3-sulfotransferase 3B1 | 2.881504 | 0.000615251 |
| 8676      | NM_003764                                                                                                                            | <i>STX11</i>         | syntaxin 11                                        | 2.871522 | 0.000246709 |
| 12        | NM_001085                                                                                                                            | <i>SERPINA3</i>      | serpin family A member 3                           | 2.867497 | 3.64128E-10 |



|           |                                                             |                  |                                                          |          |             |
|-----------|-------------------------------------------------------------|------------------|----------------------------------------------------------|----------|-------------|
| 92610     | NM_052864                                                   | <i>TIFA</i>      | TRAF interacting protein with forkhead associated domain | 2.851643 | 2.73503E-33 |
| 57822     | NM_001195010,NM_021180,NM_198173,NM_198174                  | <i>GRHL3</i>     | grainyhead like transcription factor 3                   | 2.848036 | 1.20894E-16 |
| 161742    | NM_152594                                                   | <i>SPRED1</i>    | sprouty related EVH1 domain containing 1                 | 2.841740 | 4.44435E-39 |
| 100132234 | NR_135254                                                   | <i>LINC00543</i> | long intergenic non-protein coding RNA 543               | 2.837947 | 1.92005E-46 |
| 5054      | NM_000602                                                   | <i>SERPINE1</i>  | serpin family E member 1                                 | 2.829997 | 1.78814E-07 |
| 4583      | NM_002457                                                   | <i>MUC2</i>      | mucin 2, oligomeric mucus/gel-forming                    | 2.828962 | 0.034386661 |
| 130367    | NM_001320833,NM_001320834,NM_152386                         | <i>SGPP2</i>     | sphingosine-1-phosphate phosphatase 2                    | 2.822704 | 1.00891E-06 |
| 84239     | NM_032279                                                   | <i>ATP13A4</i>   | ATPase 13A4                                              | 2.789804 | 0.00012624  |
| 23764     | NM_001161572,NM_001161573,NM_001161574,NM_012323            | <i>MAFF</i>      | MAF bZIP transcription factor F                          | 2.776537 | 3.54344E-44 |
| 54361     | NM_030761                                                   | <i>WNT4</i>      | Wnt family member 4                                      | 2.773242 | 8.64033E-08 |
| 84807     | NM_001321831,NM_139239                                      | <i>NFKBID</i>    | NFkB inhibitor delta                                     | 2.768587 | 8.43041E-13 |
| 55691     | NM_001318336,NM_001318337,NM_001318338,NM_018027, NR_134578 | <i>FRMD4A</i>    | FERM domain containing 4A                                | 2.743152 | 1.4668E-59  |
| 6495      | NM_005982                                                   | <i>SIX1</i>      | SIX homeobox 1                                           | 2.728002 | 0.020547847 |
| 440603    | NM_001010922                                                | <i>BCL2L15</i>   | BCL2 like 15                                             | 2.726637 | 0.018860821 |
| 189       | NM_000030                                                   | <i>AGXT</i>      | alanine-glyoxylate aminotransferase                      | 2.713616 | 0.012098756 |
| 2571      | NM_000817,NM_013445                                         | <i>GADI</i>      | glutamate decarboxylase 1                                | 2.707207 | 2.80963E-34 |

|        |                                                                                         |                  |                                                                       |          |             |
|--------|-----------------------------------------------------------------------------------------|------------------|-----------------------------------------------------------------------|----------|-------------|
| 145837 | NR_026979                                                                               | <i>DRAIC</i>     | downregulated RNA in cancer, inhibitor of cell invasion and migration | 2.696567 | 3.69627E-06 |
| 9982   | NM_005130                                                                               | <i>FGFBP1</i>    | fibroblast growth factor binding protein 1                            | 2.689650 | 4.47873E-27 |
| 654321 | NR_002921                                                                               | <i>SNORA75</i>   | small nucleolar RNA, H/ACA box 75                                     | 2.654799 | 0.040579853 |
| 4208   | NM_001131005,NM_001193347,NM_001193348,NM_001193349,NM_001193350,NM_001308002,NM_002397 | <i>MEF2C</i>     | myocyte enhancer factor 2C                                            | 2.649429 | 3.83792E-06 |
| 54979  | NM_017878                                                                               | <i>HRASLS2</i>   | HRAS like suppressor 2                                                | 2.647330 | 2.16615E-08 |
| 201501 | NM_001039360,NM_001318841                                                               | <i>ZBTB7C</i>    | zinc finger and BTB domain containing 7C                              | 2.616356 | 0.017686559 |
| 647033 | NR_003284                                                                               | <i>PA2G4P4</i>   | proliferation-associated 2G4 pseudogene 4                             | 2.614045 | 1.8801E-07  |
| 89884  | NM_033343                                                                               | <i>LHX4</i>      | LIM homeobox 4                                                        | 2.611339 | 0.023877991 |
| 83648  | NM_053279                                                                               | <i>FAM167A</i>   | family with sequence similarity 167 member A                          | 2.602534 | 0.047130603 |
| 3553   | NM_000576                                                                               | <i>IL1B</i>      | interleukin 1 beta                                                    | 2.584909 | 0.001061401 |
| 29931  | NR_024065                                                                               | <i>LINC00312</i> | long intergenic non-protein coding RNA 312                            | 2.571528 | 0.039453593 |
| 9429   | NM_001257386,NM_001348985,NM_001348986,NM_001348987,NM_001348988,NM_001348989,NM_004827 | <i>ABCG2</i>     | ATP binding cassette subfamily G member 2 (Junior blood group)        | 2.558833 | 1.09774E-41 |
| 319    | NM_001638                                                                               | <i>APOF</i>      | apolipoprotein F                                                      | 2.526152 | 0.015938001 |
| 5724   | NM_000952,NM_001164721,NM_001164722,NM_001164723                                        | <i>PTAFR</i>     | platelet activating factor receptor                                   | 2.498119 | 0.000197894 |

|        |                                                                                                                             |                 |                                                                  |          |             |
|--------|-----------------------------------------------------------------------------------------------------------------------------|-----------------|------------------------------------------------------------------|----------|-------------|
| 6288   | NM_000331,NM_001178006,NM_199161                                                                                            | <i>SAA1</i>     | serum amyloid A1                                                 | 2.486918 | 0.000416395 |
| 7475   | NM_006522                                                                                                                   | <i>WNT6</i>     | Wnt family member 6                                              | 2.473360 | 0.021375431 |
| 440823 | NR_003491,NR_033319,NR_033320,NR_033321                                                                                     | <i>MIAT</i>     | myocardial infarction associated transcript (non-protein coding) | 2.465545 | 0.024486896 |
| 7128   | NM_001270507,NM_001270508,NM_006290                                                                                         | <i>TNFAIP3</i>  | TNF alpha induced protein 3                                      | 2.451854 | 1.51439E-79 |
| 54873  | NM_017734                                                                                                                   | <i>PALMD</i>    | palmdelphin                                                      | 2.449319 | 0.000442443 |
| 7474   | NM_001256105,NM_003392                                                                                                      | <i>WNT5A</i>    | Wnt family member 5A                                             | 2.448495 | 0.000242313 |
| 8870   | NM_003897                                                                                                                   | <i>IER3</i>     | immediate early response 3                                       | 2.434411 | 1.98443E-32 |
| 389384 | NM_001010903                                                                                                                | <i>C6orf222</i> | chromosome 6 open reading frame 222                              | 2.428782 | 8.10536E-40 |
| 80149  | NM_001323550,NM_001323551,NM_025079                                                                                         | <i>ZC3H12A</i>  | zinc finger CCCH-type containing 12A                             | 2.425756 | 5.61079E-29 |
| 25780  | NM_001139488,NM_001349975,NM_001349976,NM_001349977,NM_001349978,NM_001349979,NM_001349980,NM_001349981,NM_015376,NM_170672 | <i>RASGRP3</i>  | RAS guanyl releasing protein 3                                   | 2.423040 | 4.12174E-15 |
| 8140   | NM_003486                                                                                                                   | <i>SLC7A5</i>   | solute carrier family 7 member 5                                 | 2.422347 | 2.4074E-113 |
| 23308  | NM_001283050,NM_001283051,NM_001283052,NM_015259                                                                            | <i>ICOSLG</i>   | inducible T-cell costimulator ligand                             | 2.416542 | 3.47898E-45 |
| 80117  | NM_025047                                                                                                                   | <i>ARL14</i>    | ADP ribosylation factor like GTPase 14                           | 2.414233 | 2.39001E-20 |
| 6752   | NM_001050                                                                                                                   | <i>SSTR2</i>    | somatostatin receptor 2                                          | 2.401737 | 0.001139554 |

|           |                                                                                              |                  |                                                                      |          |             |
|-----------|----------------------------------------------------------------------------------------------|------------------|----------------------------------------------------------------------|----------|-------------|
| 3656      | NM_001570                                                                                    | <i>IRAK2</i>     | interleukin 1 receptor associated kinase 2                           | 2.394587 | 7.72303E-43 |
| 2353      | NM_005252                                                                                    | <i>FOS</i>       | Fos proto-oncogene, AP-1 transcription factor subunit                | 2.394276 | 1.09554E-28 |
| 54658     | NM_000463                                                                                    | <i>UGT1A1</i>    | UDP glucuronosyltransferase family 1 member A1                       | 2.386919 | 2.54865E-13 |
| 54757     | NM_001243746,NM_017565,NR_027751                                                             | <i>FAM20A</i>    | FAM20A, golgi associated secretory pathway pseudokinase              | 2.386539 | 4.80758E-22 |
| 8843      | NM_006018                                                                                    | <i>HCAR3</i>     | hydroxycarboxylic acid receptor 3                                    | 2.379895 | 0.014718691 |
| 27289     | NM_014470                                                                                    | <i>RND1</i>      | Rho family GTPase 1                                                  | 2.376839 | 1.41012E-16 |
| 23120     | NM_025153                                                                                    | <i>ATP10B</i>    | ATPase phospholipid transporting 10B (putative)                      | 2.374564 | 8.60165E-25 |
| 574029    | NR_002834                                                                                    | <i>DUSP5P1</i>   | dual specificity phosphatase 5 pseudogene 1                          | 2.361572 | 3.94878E-05 |
| 1009      | NM_001308392,NM_001330576,NM_001797                                                          | <i>CDH11</i>     | cadherin 11                                                          | 2.347858 | 2.27436E-06 |
| 9283      | NM_004767                                                                                    | <i>GPR37L1</i>   | G protein-coupled receptor 37 like 1                                 | 2.343529 | 6.30748E-07 |
| 728689    | NM_001099661,NM_001099661_dup1,NM_001317856,NM_001317856_dup1,NM_001317857,NM_001317857_dup1 | <i>EIF3CL</i>    | eukaryotic translation initiation factor 3 subunit C like            | 2.323830 | 0.037963382 |
| 7477      | NM_058238                                                                                    | <i>WNT7B</i>     | Wnt family member 7B                                                 | 2.318639 | 0.000915839 |
| 57624     | NM_020864                                                                                    | <i>NYAP2</i>     | neuronal tyrosine-phosphorylated phosphoinositide-3-kinase adaptor 2 | 2.310490 | 0.018842612 |
| 100499467 | NR_036488,NR_137280,NR_137281                                                                | <i>LINC00673</i> | long intergenic non-protein coding RNA 673                           | 2.307246 | 2.53429E-37 |

|        |                                                  |                |                                                   |          |             |
|--------|--------------------------------------------------|----------------|---------------------------------------------------|----------|-------------|
| 5581   | NM_005400                                        | <i>PRKCE</i>   | protein kinase C epsilon                          | 2.295835 | 2.80756E-10 |
| 654463 | NM_001039112                                     | <i>FERIL6</i>  | fer-1 like family member 6                        | 2.286943 | 2.09537E-09 |
| 1848   | NM_001946,NM_022652                              | <i>DUSP6</i>   | dual specificity phosphatase 6                    | 2.284662 | 9.61239E-61 |
| 54575  | NM_019075                                        | <i>UGT1A10</i> | UDP glucuronosyltransferase family 1 member A10   | 2.282239 | 0.022268013 |
| 30811  | NM_014586                                        | <i>HUNK</i>    | hormonally up-regulated Neu-associated kinase     | 2.281565 | 1.28083E-13 |
| 374    | NM_001657,NM_001657_dup1                         | <i>AREG</i>    | amphiregulin                                      | 2.265958 | 1.86558E-45 |
| 8193   | NM_001135155,NM_001135156,NM_001289978,NM_004647 | <i>DPF1</i>    | double PHD fingers 1                              | 2.249271 | 0.001403238 |
| 93432  | NM_001293626                                     | <i>MGAM2</i>   | maltase-glucoamylase 2 (putative)                 | 2.244787 | 4.33373E-08 |
| 56104  | NM_018922,NM_032095                              | <i>PCDHGB1</i> | protocadherin gamma subfamily B, 1                | 2.239358 | 0.014739616 |
| 220108 | NM_001242312,NM_001330522,NM_145019              | <i>FAM124A</i> | family with sequence similarity 124 member A      | 2.237977 | 1.58417E-05 |
| 4792   | NM_020529                                        | <i>NFKB1A</i>  | NFKB inhibitor alpha                              | 2.237940 | 4.34581E-58 |
| 64150  | NR_002770                                        | <i>DIO3OS</i>  | DIO3 opposite strand/antisense RNA (head to head) | 2.232847 | 1.46553E-06 |
| 10537  | NM_006398                                        | <i>UBD</i>     | ubiquitin D                                       | 2.232811 | 1.39373E-18 |
| 7483   | NM_003395                                        | <i>WNT9A</i>   | Wnt family member 9A                              | 2.231213 | 0.017078306 |
| 29995  | NM_001278233,NM_001278234,NM_001278235,NM_014583 | <i>LMCD1</i>   | LIM and cysteine rich domains 1                   | 2.227904 | 2.11388E-19 |
| 23025  | NM_001080421                                     | <i>UNC13A</i>  | unc-13 homolog A                                  | 2.224093 | 0.016752745 |
| 4843   | NM_000625                                        | <i>NOS2</i>    | nitric oxide synthase 2                           | 2.210390 | 3.04726E-31 |

|        |                                                                                        |                 |                                                    |          |             |
|--------|----------------------------------------------------------------------------------------|-----------------|----------------------------------------------------|----------|-------------|
| 6091   | NM_001145845,NM_002941,NM_133631                                                       | <i>ROBO1</i>    | roundabout guidance receptor 1                     | 2.208295 | 0.044785203 |
| 7555   | NM_001127192,NM_001127193,NM_001127194,NM_001127195,NM_001127196,NM_003418             | <i>CNBP</i>     | CCHC-type zinc finger nucleic acid binding protein | 2.207657 | 0.019932957 |
| 405753 | NM_207581                                                                              | <i>DUOXA2</i>   | dual oxidase maturation factor 2                   | 2.204369 | 4.15127E-06 |
| 29947  | NM_013369,NM_175867                                                                    | <i>DNMT3L</i>   | DNA methyltransferase 3 like                       | 2.203337 | 0.011777928 |
| 131601 | NM_001136053,NM_001142646,NR_073377                                                    | <i>TPRA1</i>    | transmembrane protein adipocyte associated 1       | 2.196975 | 1.63682E-46 |
| 8061   | NM_001300844,NM_001300855,NM_001300856,NM_001300857,NM_005438,NR_125339                | <i>FOSL1</i>    | FOS like 1, AP-1 transcription factor subunit      | 2.189346 | 1.7784E-11  |
| 91768  | NM_001100619,NM_001256438,NM_138375,NR_023359                                          | <i>CABLES1</i>  | Cdk5 and Abl enzyme substrate 1                    | 2.188216 | 1.19381E-51 |
| 552900 | NM_001031827,NM_001031827_dup1,NM_001320579,NM_001320579_dup1,NR_135304,NR_135304_dup1 | <i>BOLA2</i>    | bolA family member 2                               | 2.177954 | 2.81382E-05 |
| 54600  | NM_021027                                                                              | <i>UGT1A9</i>   | UDP glucuronosyltransferase family 1 member A9     | 2.177157 | 0.013370381 |
| 245972 | NM_152565                                                                              | <i>ATP6V0D2</i> | ATPase H <sup>+</sup> transporting V0 subunit d2   | 2.164111 | 5.02506E-10 |
| 23491  | NM_001185176,NM_001185177,NM_024922                                                    | <i>CES3</i>     | carboxylesterase 3                                 | 2.157791 | 0.020692734 |
| 6289   | NM_001127380,NM_030754                                                                 | <i>SAA2</i>     | serum amyloid A2                                   | 2.157295 | 1.30982E-05 |
| 6098   | NM_002944                                                                              | <i>ROS1</i>     | ROS proto-oncogene 1, receptor tyrosine kinase     | 2.157269 | 0.029377843 |

|        |                                                                                         |                |                                                               |          |             |
|--------|-----------------------------------------------------------------------------------------|----------------|---------------------------------------------------------------|----------|-------------|
| 2254   | NM_002010                                                                               | <i>FGF9</i>    | fibroblast growth factor 9                                    | 2.151630 | 0.000163477 |
| 2113   | NM_001143820,NM_001162422,NM_001330451,NM_005238                                        | <i>ETSI</i>    | ETS proto-oncogene 1, transcription factor                    | 2.147555 | 1.1921E-11  |
| 137994 | NM_001199659,NM_001199660,NM_001286787,NM_001286819,NM_001286821,NM_001330515,NM_144652 | <i>LETM2</i>   | leucine zipper and EF-hand containing transmembrane protein 2 | 2.142534 | 8.37963E-09 |
| 768239 | NM_001085382                                                                            | <i>PSAPL1</i>  | prosaposin-like 1 (gene/pseudogene)                           | 2.136861 | 2.11058E-31 |
| 6776   | NM_001288718,NM_001288719,NM_001288720,NM_003152                                        | <i>STAT5A</i>  | signal transducer and activator of transcription 5A           | 2.133961 | 1.98405E-12 |
| 23034  | NM_001161576,NM_001161577,NM_015589                                                     | <i>SAMD4A</i>  | sterile alpha motif domain containing 4A                      | 2.133441 | 0.007907484 |
| 26154  | NM_015657,NM_173076,NR_103740                                                           | <i>ABCA12</i>  | ATP binding cassette subfamily A member 12                    | 2.125461 | 0.016040985 |
| 80153  | NM_001142443,NM_001142444,NM_001351378,NM_001351379,NM_025083                           | <i>EDC3</i>    | enhancer of mRNA decapping 3                                  | 2.121158 | 4.42759E-70 |
| 3038   | NM_001199280,NM_005329,NM_138612                                                        | <i>HAS3</i>    | hyaluronan synthase 3                                         | 2.106333 | 5.43929E-13 |
| 89766  | NM_001004416,NM_001199527,NM_001199528,NM_173568                                        | <i>UMODL1</i>  | uromodulin like 1                                             | 2.092678 | 0.004244456 |
| 340152 | NM_207360                                                                               | <i>ZC3H12D</i> | zinc finger CCCH-type containing 12D                          | 2.084429 | 4.59396E-09 |
| 6493   | NM_005069,NM_009586                                                                     | <i>SIM2</i>    | single-minded family bHLH transcription factor 2              | 2.083500 | 5.65789E-09 |
| 10562  | NM_006418                                                                               | <i>OLFM4</i>   | olfactomedin 4                                                | 2.080013 | 0.03806197  |

|        |                                                                                                |                |                                                   |          |             |
|--------|------------------------------------------------------------------------------------------------|----------------|---------------------------------------------------|----------|-------------|
| 8707   | NM_003783                                                                                      | <i>B3GALT2</i> | beta-1,3-galactosyltransferase 2                  | 2.079748 | 4.78676E-07 |
| 4155   | NM_001025081,NM_001025090,NM_001025092,NM_001025100,NM_001025101,NM_002385                     | <i>MBP</i>     | myelin basic protein                              | 2.077663 | 7.07534E-40 |
| 85027  | NM_032947                                                                                      | <i>SMIM3</i>   | small integral membrane protein 3                 | 2.075580 | 4.91221E-31 |
| 1827   | NM_001285389,NM_001285391,NM_001285392,NM_001285393,NM_001331016,NM_004414,NM_203417,NM_203418 | <i>RCAN1</i>   | regulator of calcineurin 1                        | 2.057258 | 1.32803E-43 |
| 9901   | NM_001033117,NM_014850                                                                         | <i>SRGAP3</i>  | SLIT-ROBO Rho GTPase activating protein 3         | 2.050598 | 4.38625E-11 |
| 7043   | NM_001329938,NM_001329939,NM_003239                                                            | <i>TGFB3</i>   | transforming growth factor beta 3                 | 2.048539 | 5.73353E-08 |
| 2069   | NM_001432                                                                                      | <i>EREG</i>    | epiregulin                                        | 2.026960 | 9.06946E-46 |
| 83697  | NM_001258426,NM_001258427,NM_001258428,NM_031467                                               | <i>SLC4A9</i>  | solute carrier family 4 member 9                  | 2.022015 | 0.031686334 |
| 22822  | NM_007350                                                                                      | <i>PHLDA1</i>  | pleckstrin homology like domain family A member 1 | 2.021287 | 1.56272E-29 |
| 643596 | NM_001190228                                                                                   | <i>RNF224</i>  | ring finger protein 224                           | 2.018550 | 0.013656647 |
| 5971   | NM_006509                                                                                      | <i>RELB</i>    | RELB proto-oncogene, NF-kB subunit                | 2.017163 | 1.90018E-21 |
| 4973   | NM_001172632,NM_001172633,NM_002543                                                            | <i>OLRI</i>    | oxidized low density lipoprotein receptor 1       | 2.015680 | 7.86678E-23 |
| 3659   | NM_002198                                                                                      | <i>IRF1</i>    | interferon regulatory factor 1                    | 2.006544 | 1.09E-27    |
| 56999  | NM_001318781,NM_182920                                                                         | <i>ADAMTS9</i> | ADAM metallopeptidase with thrombospondin         | 2.006445 | 1.13335E-16 |



|           |                                                                            |                     |                                             |           |             |
|-----------|----------------------------------------------------------------------------|---------------------|---------------------------------------------|-----------|-------------|
|           |                                                                            |                     | type 1 motif 9                              |           |             |
| 2637      | NM_001301687,NM_001485                                                     | <i>GBX2</i>         | gastrulation brain homeobox 2               | 2.006334  | 0.000168966 |
| 2302      | NM_001454                                                                  | <i>FOXJ1</i>        | forkhead box J1                             | -2.021778 | 0.000452699 |
| 11248     | NM_007225                                                                  | <i>NXPH3</i>        | neurexophilin 3                             | -2.037506 | 0.000345599 |
| 7277      | NM_001278552,NM_006000                                                     | <i>TUBA4A</i>       | tubulin alpha 4a                            | -2.046417 | 0.029912364 |
| 57576     | NM_001122819,NM_001287212,NM_020816                                        | <i>KIF17</i>        | kinesin family member 17                    | -2.049606 | 0.0146898   |
| 100335030 | NR_033267                                                                  | <i>LOC100335030</i> | FGFR1 oncogene partner 2 pseudogene         | -2.065713 | 0.008546575 |
| 100506084 | NM_001039083,NM_001103154,NM_001330240,NM_001330240_dup1,NM_001330240_dup2 | <i>ARL17B</i>       | ADP ribosylation factor like GTPase 17B     | -2.139146 | 0.000723866 |
| 10451     | NM_001079874,NM_006113                                                     | <i>VAV3</i>         | vav guanine nucleotide exchange factor 3    | -2.193649 | 1.05066E-14 |
| 11037     | NM_001198595,NM_006873                                                     | <i>STON1</i>        | stonin 1                                    | -2.199848 | 0.00237274  |
| 105378744 | NR_147163                                                                  | <i>LINC01767</i>    | long intergenic non-protein coding RNA 1767 | -2.217439 | 0.036423777 |
| 2826      | NM_016602                                                                  | <i>CCR10</i>        | C-C motif chemokine receptor 10             | -2.264296 | 0.002585618 |
| 100302285 | NR_036052_chr12,NR_036052_chr2,NR_036052_chr5,NR_036052_dup1               | <i>MIR1244-1</i>    | microRNA 1244-1                             | -2.267974 | 0.005032682 |
| 388121    | NM_001311175,NM_207381                                                     | <i>TNFAIP8L3</i>    | TNF alpha induced protein 8 like 3          | -2.277357 | 0.024593843 |
| 25790     | NM_012337                                                                  | <i>CFAP45</i>       | cilia and flagella associated protein 45    | -2.316005 | 0.032593285 |
| 57529     | NM_020769                                                                  | <i>RTL9</i>         | retrotransposon Gag like 9                  | -2.337786 | 0.042098959 |

|           |                                                               |                      |                                                      |           |             |
|-----------|---------------------------------------------------------------|----------------------|------------------------------------------------------|-----------|-------------|
| 81031     | NM_030777                                                     | <i>SLC2A10</i>       | solute carrier family 2 member 10                    | -2.406325 | 0.011579043 |
| 7140      | NM_001042780,NM_001042781,NM_001042782,NM_001297646,NM_006757 | <i>TNNT3</i>         | troponin T3, fast skeletal type                      | -2.426537 | 0.04018045  |
| 100529241 | NM_001202485                                                  | <i>HSPE1-MOB4</i>    | HSPE1-MOB4 readthrough                               | -2.497132 | 0.049725656 |
| 80739     | NM_025260,NM_138272,NM_138273,NM_138274,NM_138275,NM_138277   | <i>MPIG6B</i>        | megakaryocyte and platelet inhibitory receptor G6b   | -2.534046 | 0.043816712 |
| 56154     | NM_001350162,NR_146525                                        | <i>TEX15</i>         | testis expressed 15, meiosis and synapsis associated | -2.610966 | 0.035846536 |
| 101929069 | NR_146489                                                     | <i>LINC01633</i>     | long intergenic non-protein coding RNA 1633          | -2.622860 | 0.03609831  |
| 2702      | NM_005266,NM_181703                                           | <i>GJA5</i>          | gap junction protein alpha 5                         | -2.640448 | 0.03257668  |
| 148418    | NM_001010971,NM_001134663,NM_001134664                        | <i>SAMD13</i>        | sterile alpha motif domain containing 13             | -2.641731 | 0.013972694 |
| 100532724 | NR_037804                                                     | <i>NPHP3-ACAD11</i>  | NPHP3-ACAD11 readthrough (NMD candidate)             | -2.644890 | 0.00635894  |
| 154091    | NM_145176                                                     | <i>SLC2A12</i>       | solute carrier family 2 member 12                    | -2.658703 | 0.044603932 |
| 339988    | NR_147207                                                     | <i>LINC002481</i>    | long intergenic non-protein coding RNA 2481          | -2.686400 | 0.03501052  |
| 5321      | NM_001311193,NM_024420                                        | <i>PLA2G4A</i>       | phospholipase A2 group IVA                           | -2.739050 | 0.017679096 |
| 101927528 | NR_104644,NR_104645                                           | <i>LINC01204</i>     | long intergenic non-protein coding RNA 1204          | -2.824134 | 0.025398221 |
| 552891    | NM_004125                                                     | <i>DNAJC25-GNG10</i> | DNAJC25-GNG10 readthrough                            | -2.923793 | 2.76185E-05 |
| 105377623 | NR_136203                                                     | <i>LOC105377623</i>  | uncharacterized LOC105377623                         | -2.961757 | 0.042343419 |
| 387856    | NM_001013635                                                  | <i>CCDC184</i>       | coiled-coil domain containing 184                    | -3.632869 | 0.006598134 |

|           |                                                                                                                                                                                                                                                                                                         |                        |                                                                      |            |             |
|-----------|---------------------------------------------------------------------------------------------------------------------------------------------------------------------------------------------------------------------------------------------------------------------------------------------------------|------------------------|----------------------------------------------------------------------|------------|-------------|
| 100526767 | NM_001198954                                                                                                                                                                                                                                                                                            | <i>RNF103-CHMP3</i>    | RNF103-CHMP3 readthrough                                             | -3.662446  | 0.00207372  |
| 27185     | NM_001012957,NM_001012958,NM_001012959,NM_001164537,NM_001164538,NM_001164539,NM_001164540,NM_001164541,NM_001164542,NM_001164544,NM_001164545,NM_001164546,NM_001164547,NM_001164548,NM_001164549,NM_001164550,NM_001164551,NM_001164552,NM_001164553,NM_001164554,NM_001164555,NM_001164556,NM_018662 | <i>DISC1</i>           | disrupted in schizophrenia 1                                         | -3.835430  | 0.03197595  |
| 414060    | NM_001001418,NM_001001418_dup1                                                                                                                                                                                                                                                                          | <i>TBC1D3C</i>         | TBC1 domain family member 3C                                         | -3.881845  | 0.006547149 |
| 386593    | NR_027928                                                                                                                                                                                                                                                                                               | <i>CHKB-CPT1B</i>      | CHKB-CPT1B readthrough (NMD candidate)                               | -3.927349  | 0.046335632 |
| 100526832 | NM_001199290,NR_144936                                                                                                                                                                                                                                                                                  | <i>PHOSPHO2-KLHL23</i> | PHOSPHO2-KLHL23 readthrough                                          | -4.108550  | 0.001683051 |
| 100533195 | NR_037915                                                                                                                                                                                                                                                                                               | <i>FAM24B-CUZD1</i>    | FAM24B-CUZD1 readthrough                                             | -4.524952  | 0.024170776 |
| 26134     | NR_104269                                                                                                                                                                                                                                                                                               | <i>RALGAP1P1</i>       | Ral GTPase activating protein catalytic alpha subunit 1 pseudogene 1 | -4.679238  | 0.020276568 |
| 100616394 | NR_039646_chr2,NR_039646_chr3                                                                                                                                                                                                                                                                           | <i>MIR4444-1</i>       | microRNA 4444-1                                                      | -8.983079  | 0.002262391 |
| 102465252 | NR_106761                                                                                                                                                                                                                                                                                               | <i>MIR6506</i>         | microRNA 6506                                                        | -11.739658 | 0.008430155 |
| 170688    | NR_104005                                                                                                                                                                                                                                                                                               | <i>NUDT4P2</i>         | nudix hydrolase 4 pseudogene 2                                       | -12.648102 | 0.007944917 |

**Table S5.** Gene ontology (GO) enrichment analysis of differentially expressed genes between Caco-2 cells stimulated with wild-type spore and control.

| GO ID                     | GO description                | <i>p</i> -value | Corrected<br><i>p</i> -value <sup>a</sup> | Cluster<br>frequency <sup>b</sup> | Total<br>frequency <sup>c</sup> | Genes                                                            |
|---------------------------|-------------------------------|-----------------|-------------------------------------------|-----------------------------------|---------------------------------|------------------------------------------------------------------|
| <b>Biological process</b> |                               |                 |                                           |                                   |                                 |                                                                  |
| 6935                      | chemotaxis                    | 4.03E-08        | 2.16E-05                                  | 8/54<br>14.8%                     | 169/17791<br>0.9%               | <i>ROBO3 CXCL10 CXCL8 CCL20 SLIT1 SAA1 SAA2 CXCL1</i>            |
| 42330                     | taxis                         | 4.03E-08        | 2.16E-05                                  | 8/54<br>14.8%                     | 169/17791<br>0.9%               | <i>ROBO3 CXCL10 CXCL8 CCL20 SLIT1 SAA1 SAA2 CXCL1</i>            |
| 40011                     | locomotion                    | 6.99E-07        | 2.49E-04                                  | 10/54<br>18.5%                    | 440/17791<br>2.4%               | <i>ROBO3 CXCL10 CXCL8 DNAH2 CCL20 SLIT1 SAA1 SIX1 SAA2 CXCL1</i> |
| 7626                      | locomotory behavior           | 1.57E-06        | 4.19E-04                                  | 8/54<br>14.8%                     | 273/17791<br>1.5%               | <i>ROBO3 CXCL10 CXCL8 CCL20 SLIT1 SAA1 SAA2 CXCL1</i>            |
| 6954                      | inflammatory response         | 4.64E-06        | 8.27E-04                                  | 8/54<br>14.8%                     | 316/17791<br>1.7%               | <i>CXCL10 CXCL8 CCL20 PLA2G4B STAB1 SAA1 SAA2 CXCL1</i>          |
| 7610                      | behavior                      | 1.00E-05        | 1.53E-03                                  | 9/54<br>16.6%                     | 466/17791<br>2.6%               | <i>ROBO3 CXCL10 CXCL8 TAL2 CCL20 SLIT1 SAA1 SAA2 CXCL1</i>       |
| 30593                     | neutrophil chemotaxis         | 2.47E-05        | 2.65E-03                                  | 3/54<br>5.5%                      | 19/17791<br>0.1%                | <i>CXCL8 SAA1 SAA2</i>                                           |
| 9611                      | response to wounding          | 3.31E-05        | 3.22E-03                                  | 9/54<br>16.6%                     | 542/17791<br>3.0%               | <i>CXCL10 KLF6 CXCL8 CCL20 PLA2G4B STAB1 SAA1 SAA2 CXCL1</i>     |
| 9605                      | response to external stimulus | 3.77E-05        | 3.36E-03                                  | 9/54<br>16.6%                     | 551/17791<br>3.0%               | <i>ROBO3 CXCL10 CXCL8 CCL20 SLIT1 SAA1 SAA2 CXCL1 SSTR2</i>      |

|       |                                                |          |          |                |                   |                                                               |
|-------|------------------------------------------------|----------|----------|----------------|-------------------|---------------------------------------------------------------|
| 6952  | defense response                               | 9.47E-05 | 7.80E-03 | 9/54<br>16.6%  | 621/17791<br>3.4% | <i>CXCL10 CXCL8 CD83 CCL20 PLA2G4B STAB1 SAA1 SAA2 CXCL1</i>  |
| 48247 | lymphocyte chemotaxis                          | 1.88E-04 | 1.44E-02 | 2/54<br>3.7%   | 7/17791<br>0.0%   | <i>SAA1 SAA2</i>                                              |
| 30595 | leukocyte chemotaxis                           | 2.99E-04 | 2.14E-02 | 3/54<br>5.5%   | 43/17791<br>0.2%  | <i>CXCL8 SAA1 SAA2</i>                                        |
| 51674 | localization of cell                           | 3.71E-04 | 2.24E-02 | 6/54<br>11.1%  | 315/17791<br>1.7% | <i>CXCL8 DNAH2 SLIT1 SAA1 SIX1 SAA2</i>                       |
| 48870 | cell motility                                  | 3.71E-04 | 2.24E-02 | 6/54<br>11.1%  | 315/17791<br>1.7% | <i>CXCL8 DNAH2 SLIT1 SAA1 SIX1 SAA2</i>                       |
| 60326 | cell chemotaxis                                | 4.15E-04 | 2.34E-02 | 3/54<br>5.5%   | 48/17791<br>0.2%  | <i>CXCL8 SAA1 SAA2</i>                                        |
| 48246 | macrophage chemotaxis                          | 4.89E-04 | 2.54E-02 | 2/54<br>3.7%   | 11/17791<br>0.0%  | <i>SAA1 SAA2</i>                                              |
| 2376  | immune system process                          | 4.99E-04 | 2.54E-02 | 10/54<br>18.5% | 949/17791<br>5.3% | <i>CXCL10 KLF6 RIT1 CXCL8 CD83 CCL20 SAA1 SIX1 SAA2 CXCL1</i> |
| 6928  | cellular movement                              | 5.47E-04 | 2.66E-02 | 7/54<br>12.9%  | 474/17791<br>2.6% | <i>ROBO3 CXCL8 DNAH2 SLIT1 SAA1 SIX1 SAA2</i>                 |
| 50716 | positive regulation of interleukin-1 secretion | 8.04E-04 | 3.74E-02 | 2/54<br>3.7%   | 14/17791<br>0.0%  | <i>SAA1 SAA2</i>                                              |
| 50900 | leukocyte migration                            | 9.23E-04 | 3.96E-02 | 3/54<br>5.5%   | 63/17791<br>0.3%  | <i>CXCL8 SAA1 SAA2</i>                                        |
| 50704 | regulation of interleukin-1                    | 9.26E-04 | 3.96E-02 | 2/54           | 15/17791          | <i>SAA1 SAA2</i>                                              |

|                           |                                    |          |          |               |                   |                                                           |
|---------------------------|------------------------------------|----------|----------|---------------|-------------------|-----------------------------------------------------------|
|                           | secretion                          |          |          | 3.7%          | 0.0%              |                                                           |
| <b>Molecular Function</b> |                                    |          |          |               |                   |                                                           |
| 1664                      | G-protein-coupled receptor binding | 3.41E-06 | 7.30E-04 | 6/54<br>11.1% | 136/17791<br>0.7% | <i>CXCL10 CXCL8 CCL20 SAA1 SAA2 CXCL1</i>                 |
| 8009                      | chemokine activity                 | 1.23E-05 | 1.64E-03 | 4/54<br>7.4%  | 47/17791<br>0.2%  | <i>CXCL10 CXCL8 CCL20 CXCL1</i>                           |
| 42379                     | chemokine receptor binding         | 1.84E-05 | 2.19E-03 | 4/54<br>7.4%  | 52/17791<br>0.2%  | <i>CXCL10 CXCL8 CCL20 CXCL1</i>                           |
| 6935                      | chemotaxis                         | 4.03E-08 | 2.16E-05 | 8/54<br>14.8% | 169/17791<br>0.9% | <i>ROBO3 CXCL10 CXCL8 CCL20 SLIT1 SAA1 SAA2 CXCL1</i>     |
| <b>Cellular component</b> |                                    |          |          |               |                   |                                                           |
| 5615                      | extracellular space                | 3.77E-04 | 2.24E-02 | 9/54<br>16.6% | 747/17791<br>4.1% | <i>CXCL10 CXCL8 CCL20 SLIT1 SAA1 PRH2 SAA2 CXCL1 FBNI</i> |

<sup>a</sup> *p*-value in hypergeometric test after correction

<sup>b</sup> The denominator represents the total number of genes with GO annotation and the numerator represents the number of genes belonging to each GO term

<sup>c</sup> The denominator represents the number of reference genes with GO annotation and the numerator represents the number of references genes annotated in the listed GO terms

**Table S6.** Gene Ontology (GO) enrichment analysis of differentially expressed genes between Caco-2 cells stimulated with CotG-p75 and control.

| GO ID                     | GO description                | <i>p</i> -value | Corrected<br><i>p</i> -value <sup>a</sup> | Cluster<br>frequency <sup>b</sup> | Total<br>frequency <sup>c</sup> | Genes                                                                                                                                                                                                                                                                                                                                  |
|---------------------------|-------------------------------|-----------------|-------------------------------------------|-----------------------------------|---------------------------------|----------------------------------------------------------------------------------------------------------------------------------------------------------------------------------------------------------------------------------------------------------------------------------------------------------------------------------------|
| <b>Biological process</b> |                               |                 |                                           |                                   |                                 |                                                                                                                                                                                                                                                                                                                                        |
| 42221                     | response to chemical stimulus | 3.70E-15        | 5.18E-12                                  | 54/202<br>26.7%                   | 1466/17784<br>8.2%              | <i>ROBO3 OXTR CD83 CXCL8 TAT SERPINE1 CXCL1 CXCL3 ETS1 CXCL2 CX3CL1 ROBO1 PLAUCYP1B1 OLR1 CCR6 MBL2 SLC34A3 DUSP4 IGFBP1 UGT1A1 WNT5A FOS RNASE2 SSTR2 DUSP6 ALDH1A3 IL1B AHRR TLR7 CRYAB ABCG2 ITPR1 TNFRSF11A WNT6 IRAK2 UBD SLIT1 WNT4 STAT5A EGR1 EGR2 CCL22 NOS2 CCL20 WNT7B FOSL1 NFKBIA CXCL10 CXCL11 CYP1A1 SAA1 SAA2 FSBP</i> |
| 42330                     | taxis                         | 5.20E-15        | 5.18E-12                                  | 20/202<br>9.9%                    | 169/17784<br>0.9%               | <i>ROBO3 CCL22 CXCL8 CCL20 CXCL1 TNFRSF11A RNASE2 CXCL3 CXCL2 CX3CL1 ROBO1 FOSL1 CXCL10 CXCL11 PLAUCIL1B SAA1 SLIT1 SAA2 CCR6</i>                                                                                                                                                                                                      |
| 6935                      | chemotaxis                    | 5.20E-15        | 5.18E-12                                  | 20/202<br>9.9%                    | 169/17784<br>0.9%               | <i>ROBO3 CCL22 CXCL8 CCL20 CXCL1 TNFRSF11A RNASE2 CXCL3 CXCL2 CX3CL1 ROBO1 FOSL1 CXCL10 CXCL11 PLAUCIL1B SAA1 SLIT1 SAA2 CCR6</i>                                                                                                                                                                                                      |
| 6952                      | defense response              | 6.97E-13        | 5.21E-10                                  | 32/202<br>15.8%                   | 621/17784<br>3.4%               | <i>SERPINA3 CD83 CXCL8 SERPINE1 CXCL1 CXCL3 CXCL2 CX3CL1 MMP25 IRAK2 UBD TIFA OLR1 SIPR3 CCR6 ICOSLG MBL2 CCL22 NOS2 CCL20 WNT5A FOS FOSL1 CXCL10 CXCL11 IL1B BCL3 SAA1 LCN2 SAA2 TLR7 NFKBID</i>                                                                                                                                      |
| 9605                      | response to external stimulus | 1.03E-12        | 6.14E-10                                  | 30/202<br>14.8%                   | 552/17784<br>3.1%               | <i>ROBO3 CXCL8 CXCL1 TNFRSF11A CXCL3 CXCL2 CX3CL1 ROBO1 WNT6 PLAUCGJA10 SLIT1 CCR6</i>                                                                                                                                                                                                                                                 |

|       |                                           |          |          |                 |                     |  |                                                                                                                                                                                                                                                                                                                                                                                             |
|-------|-------------------------------------------|----------|----------|-----------------|---------------------|--|---------------------------------------------------------------------------------------------------------------------------------------------------------------------------------------------------------------------------------------------------------------------------------------------------------------------------------------------------------------------------------------------|
|       |                                           |          |          |                 |                     |  | <i>SLC34A3 CCL22 UGT1A1 CCL20 WNT7B WNT5A FOS RNASE2 SSTR2 FOSL1 CXCL10 CXCL11 IL1B CYP1A1 SAA1 AHRR SAA2</i>                                                                                                                                                                                                                                                                               |
| 48518 | positive regulation of biological process | 1.43E-12 | 7.13E-10 | 63/202<br>31.1% | 2210/17784<br>12.4% |  | <i>OXTR CD83 CXCL8 CSF1 SERPINE1 ADRA1D AREG ETS1 CX3CL1 ICAM1 ROBO1 FGF9 IKBKE LMCD1 PHLDA1 ICOSLG MBL2 VAV3 IGFBP1 MEF2C FGFBP1 PRKCE TESC WNT5A FOS PROX1 DUSP6 BTC ALDH1A3 IL1B IRF1 AHRR TLR7 SOS1 HBEGF FAM129A TGFA TNFRSF11A BARX2 RELB WNT6 IRAK2 UBD TIFA S1PR3 WNT4 STAT5A EGR1 EGR2 NOS2 WNT7B TNFRSF9 SAMD4A GRHL3 FOSL1 NFKBIA CXCL10 BCL3 CYP1A1 SAA1 SAA2 NFKBID TMEM9B</i> |
| 9611  | response to wounding                      | 3.92E-12 | 1.67E-09 | 29/202<br>14.3% | 543/17784<br>3.0%   |  | <i>SERPINA3 CXCL8 SERPINE1 CXCL1 CXCL3 CXCL2 CX3CL1 MMP25 PLAUI IRAK2 TIFA OLR1 S1PR3 MBL2 IGFBP1 SERPINB2 CCL22 CCL20 WNT5A GRHL3 FOS CXCL10 CXCL11 IL1B CYP1A1 SAA1 AHRR SAA2 NFKBID</i>                                                                                                                                                                                                  |
| 48522 | positive regulation of cellular process   | 8.84E-12 | 3.30E-09 | 58/202<br>28.7% | 2006/17784<br>11.2% |  | <i>OXTR CD83 CSF1 SERPINE1 ADRA1D AREG ETS1 CX3CL1 ICAM1 ROBO1 FGF9 IKBKE LMCD1 PHLDA1 ICOSLG MBL2 VAV3 IGFBP1 MEF2C FGFBP1 PRKCE TESC WNT5A FOS PROX1 DUSP6 BTC ALDH1A3 IL1B IRF1 AHRR TLR7 SOS1 HBEGF FAM129A TGFA TNFRSF11A BARX2 UBD TIFA S1PR3 WNT4 STAT5A EGR1 EGR2 WNT7B TNFRSF9 SAMD4A GRHL3 FOSL1 NFKBIA CXCL10 BCL3 CYP1A1 SAA1 SAA2 NFKBID TMEM9B</i>                            |
| 2376  | immune system process                     | 3.68E-11 | 1.10E-08 | 37/202<br>18.3% | 949/17784<br>5.3%   |  | <i>DYRK3 CD83 CXCL8 CSF1 CXCL1 TNFRSF11A CXCL3 ETS1 CXCL2 CX3CL1 ICAM1 RELB IRAK2 UBD CCR6 IKBKE ICOSLG MBL2 STAT5A EGR1</i>                                                                                                                                                                                                                                                                |



|       |                     |          |          |                 |                     |                                                                                                                                                                                                                                                                                                                                                             |
|-------|---------------------|----------|----------|-----------------|---------------------|-------------------------------------------------------------------------------------------------------------------------------------------------------------------------------------------------------------------------------------------------------------------------------------------------------------------------------------------------------------|
|       |                     |          |          |                 |                     | <i>CCL22 NOS2 TIPARP CCL20 WNT5A NFKB2 APLN NFKB1A CXCL10 CXCL11 IL1B IRF1 BCL3 SAA1 LCN2 SAA2 TLR7</i>                                                                                                                                                                                                                                                     |
| 7626  | locomotory behavior | 4.31E-11 | 1.17E-08 | 20/202<br>9.9%  | 273/17784<br>1.5%   | <i>ROBO3 CCL22 CXCL8 CCL20 CXCL1 TNFRSF11A RNASE2 CXCL3 CXCL2 CX3CL1 ROBO1 FOSL1 CXCL10 CXCL11 PLAUI IL1B SAA1 SLIT1 SAA2 CCR6</i>                                                                                                                                                                                                                          |
| 48513 | organ development   | 1.33E-10 | 3.05E-08 | 52/202<br>25.7% | 1792/17784<br>10.0% | <i>OXTR DYRK3 CXCL8 CSF1 SERPINE1 TNFAIP2 IKZF3 CX3CL1 ROBO1 FGF9 PLAUI ZC3H12A VAV3 IGFBP1 MEF2C MEF2B UGT1A1 WNT5A PROX1 RGMA ALDH1A3 MRAS IRF1 AHRR ALPK3 CRYAB HBEGF LAMA4 TNFRSF11A BARX2 RELB WNT6 UBD SLIT1 WNT4 STAT5A EGR1 EGR2 NOS2 TIPARP WNT7B GRHL3 NFKB2 APLN RCAN1 CXCL10 GJB2 KRT17 DHRS9 BCL3 CYP1A1 LHX4</i>                              |
| 23046 | signaling process   | 1.63E-10 | 3.25E-08 | 58/202<br>28.7% | 2157/17784<br>12.1% | <i>OXTR CD83 CXCL8 RASEF ADRA1D CXCL1 CX3CL1 RND1 RAB43 SPRED1 FGF9 PLAUI CCR6 CA8 ICOSLG DUSP4 VAV3 IGFBP1 FGFBP1 ARL14 PRKCE WNT5A HUNK FOS SSTR2 DUSP6 MRAS SYPL1 SNPH IL1B TLR7 SOS1 CRYAB HBEGF ITPR1 TGFA DAPPI TNFRSF11A GNAI1 RASGRP3 IRAK2 TIFA SLIT1 SIPR3 NPTX1 STAT5A EGR2 CCL22 NOS2 CCL20 GAD1 NFKB2 APLN NFKB1A RCAN1 CXCL10 CXCL11 BCL3</i> |
| 23060 | signal transmission | 1.63E-10 | 3.25E-08 | 58/202<br>28.7% | 2157/17784<br>12.1% | <i>OXTR CD83 CXCL8 RASEF ADRA1D CXCL1 CX3CL1 RND1 RAB43 SPRED1 FGF9 PLAUI CCR6 CA8 ICOSLG DUSP4 VAV3 IGFBP1 FGFBP1 ARL14 PRKCE WNT5A HUNK FOS SSTR2 DUSP6 MRAS SYPL1 SNPH IL1B TLR7 SOS1 CRYAB HBEGF ITPR1 TGFA DAPPI TNFRSF11A GNAI1 RASGRP3 IRAK2 TIFA SLIT1 SIPR3 NPTX1 STAT5A EGR2</i>                                                                  |

|       |                                                   |          |          |                 |                     |                                                                                                                                                                                                                                                                                                                                                                                                                                                                  |
|-------|---------------------------------------------------|----------|----------|-----------------|---------------------|------------------------------------------------------------------------------------------------------------------------------------------------------------------------------------------------------------------------------------------------------------------------------------------------------------------------------------------------------------------------------------------------------------------------------------------------------------------|
|       |                                                   |          |          |                 |                     | <i>CCL22 NOS2 CCL20 GAD1 NFKB2 APLN NFKBIA RCAN1 CXCL10 CXCL11 BCL3</i>                                                                                                                                                                                                                                                                                                                                                                                          |
| 48731 | system development                                | 2.26E-10 | 4.23E-08 | 62/202<br>30.6% | 2422/17784<br>13.6% | <i>ROBO3 OXTR DYRK3 CXCL8 CSF1 SERPINE1 TNFAIP2 CXCL1 IKZF3 CX3CL1 ROBO1 RND1 FGF9 PLAUI ZC3H12A VAV3 IGFBP1 MEF2C MEF2B UGT1A1 WNT5A FOS PROX1 RGMA SLC7A5 ALDH1A3 MRAS IRF1 CDH11 AHRR ALPK3 CRYAB HBEGF LAMA4 TNFRSF11A BARX2 RELB WNT6 GJA10 UBD SLIT1 NPTX1 WNT4 STAT5A EGR1 EGR2 NOS2 TIPARP WNT7B CABLES1 GRHL3 FOXN4 NFKB2 APLN RCAN1 CXCL10 GJB2 KRT17 DHRS9 BCL3 CYP1A1 LHX4</i>                                                                       |
| 51239 | regulation of multicellular<br>organismal process | 2.71E-10 | 4.77E-08 | 38/202<br>18.8% | 1068/17784<br>6.0%  | <i>OXTR CD83 CSF1 LAMA4 SERPINE1 TNFRSF11A ETS1 CX3CL1 ROBO1 NPPB WNT6 FGF9 PLAUI SLIT1 SIPR3 LMCD1 WNT4 STAT5A EGR1 EGR2 NOS2 TESC WNT7B WNT5A PROX1 SSTR2 BTC NFKBIA CXCL10 IL1B IRF1 BCL3 MAFF SAA1 SAA2 TLR7 NFKBID HBEGF</i>                                                                                                                                                                                                                                |
| 32502 | developmental process                             | 3.55E-10 | 5.89E-08 | 74/202<br>36.6% | 3234/17784<br>18.1% | <i>ROBO3 OXTR DYRK3 CXCL8 CSF1 SERPINE1 TNFAIP2 ADRA1D CXCL1 IKZF3 CX3CL1 ROBO1 RND1 NPPB DNMT3L SPRED1 FGF9 PLAUI ZC3H12A IER3 VAV3 IGFBP1 MEF2C MEF2B TPRA1 UGT1A1 WNT5A HUNK FOS PROX1 DUSP6 RGMA SLC7A5 ALDH1A3 MRAS IL1B IRF1 CDH11 AHRR ALPK3 CRYAB HBEGF LAMA4 ITPR1 TNFRSF11A BARX2 RELB WNT6 GJA10 UBD SLIT1 SIPR3 NPTX1 WNT4 STAT5A EGR1 EGR2 NOS2 TIPARP WNT7B CABLES1 GRHL3 FOXN4 NFKB2 APLN RCAN1 CXCL10 GJB2 KRT17 DHRS9 BCL3 MAFF CYP1A1 LHX4</i> |
| 7275  | multicellular<br>organismal                       | 3.84E-10 | 6.04E-08 | 70/202          | 2971/17784          | <i>ROBO3 OXTR DYRK3 CXCL8 CSF1 SERPINE1</i>                                                                                                                                                                                                                                                                                                                                                                                                                      |

|       |                        |           |          |          |                  |                     |                                                                                                                                                                                                                                                                                                                                                                                                         |
|-------|------------------------|-----------|----------|----------|------------------|---------------------|---------------------------------------------------------------------------------------------------------------------------------------------------------------------------------------------------------------------------------------------------------------------------------------------------------------------------------------------------------------------------------------------------------|
|       | development            |           |          |          | 34.6%            | 16.7%               | <i>TNFAIP2 ADRA1D CXCL1 IKZF3 CX3CL1 ROBO1 RND1 NPPB DNMT3L SPRED1 FGF9 PLAUC3H12A VAV3 IGFBP1 MEF2C MEF2B UGT1A1 WNT5A HUNK FOS PROX1 RGMA SLC7A5 ALDH1A3 MRAS IL1B IRF1 CDH11 AHRR ALPK3 CRYAB HBEGF LAMA4 ITPR1 TNFRSF11A BARX2 RELB WNT6 GJA10 UBD SLIT1 NPTX1 WNT4 STAT5A EGR1 EGR2 NOS2 TIPARP WNT7B CABLES1 GRHL3 FOXN4 NFkB2 APLN RCAN1 CXCL10 GJB2 KRT17 DHRS9 BCL3 MAFF CYP1A1 LHX4</i>       |
| 48856 | anatomical development | structure | 4.62E-10 | 6.90E-08 | 65/202<br>32.1%  | 2656/17784<br>14.9% | <i>ROBO3 OXTR DYRK3 CXCL8 CSF1 SERPINE1 TNFAIP2 CXCL1 IKZF3 CX3CL1 ROBO1 RND1 NPPB FGF9 PLAUC3H12A IER3 VAV3 IGFBP1 MEF2C MEF2B UGT1A1 WNT5A FOS PROX1 RGMA SLC7A5 ALDH1A3 MRAS IRF1 CDH11 AHRR ALPK3 CRYAB HBEGF LAMA4 TNFRSF11A BARX2 RELB WNT6 GJA10 UBD SLIT1 SIPR3 NPTX1 WNT4 STAT5A EGR1 EGR2 NOS2 TIPARP WNT7B CABLES1 GRHL3 FOXN4 NFkB2 APLN RCAN1 CXCL10 GJB2 KRT17 DHRS9 BCL3 CYP1A1 LHX4</i> |
| 65007 | biological regulation  |           | 5.60E-10 | 7.89E-08 | 122/202<br>60.3% | 6941/17784<br>39.0% | <i>OXTR CD83 CSF1 SERPINE1 RASEF TBC1D3F IKZF3 ETS1 TBC1D3G ICAM1 NPPB RAB43 FGF9 PLAUCYP1B1 ZNF169 PHLDA1 ICOSLG IER3 SLC34A3 IGFBP1 MEF2C MEF2B ARL14 PRKCE WNT5A BTC ITPR1 TGFA DAPP1 TNFRSF11A RASGRP3 WNT6 IRAK2 UBD PACSIN1 WNT4 STAT5A EGR1 EGR2 TNFRSF9 FOXN4 NFkB2 FOSL1 ABTB2 NFkBIA RCAN1 CXCL10 CXCL11 BCL3 MAFF CYP1A1 LCN2 LHX4 NFkBID TMEM9B SERPINA3 DYRK3 CXCL8 TNFAIP3</i>            |

|       |                             |          |          |                 |                     |                                                                                                                                                                                                                                                                                                                                                                                |
|-------|-----------------------------|----------|----------|-----------------|---------------------|--------------------------------------------------------------------------------------------------------------------------------------------------------------------------------------------------------------------------------------------------------------------------------------------------------------------------------------------------------------------------------|
|       |                             |          |          |                 |                     | <i>ADRA1D CXCL1 AREG CX3CL1 ROBO1 RND1 DNMT3L SPRED1 CCR6 CA8 IKBKE LMCD1 MBL2 DUSP4 VAV3 FGFBP1 SERPINB2 UGT1A1 TESC HUNK FOS PROX1 SSTR2 DUSP6 RGMA ALDH1A3 MRAS SNPH IL1B IRF1 AHRR TLR7 NCOA7 SOS1 CRYAB HBEGF BIRC3 LAMA4 RGS16 FAM129A BARX2 GNAI1 RELB PALMD TIFA SLIT1 SIPR3 CCL22 NOS2 CCL20 GAD1 WNT7B LGI3 SAMD4A CABLES1 GRHL3 APLN DHRS9 FABP6 SAA1 SAA2 FSBP</i> |
| 6954  | inflammatory response       | 5.80E-10 | 7.89E-08 | 20/202<br>9.9%  | 316/17784<br>1.7%   | <i>SERPINA3 CCL22 CXCL8 CCL20 CXCL1 FOS CXCL3 CXCL2 CXCL10 MMP25 CXCL11 IRAK2 IL1B TIFA SAA1 OLR1 SAA2 SIPR3 NFKBID MBL2</i>                                                                                                                                                                                                                                                   |
| 7610  | behavior                    | 6.80E-10 | 8.84E-08 | 24/202<br>11.8% | 466/17784<br>2.6%   | <i>EGR1 ROBO3 OXTR EGR2 CCL22 CXCL8 CCL20 CXCL1 FOS TNFRSF11A RNASE2 CXCL3 CXCL2 CX3CL1 ROBO1 FOSL1 CXCL10 CXCL11 PLAUI IL1B SAA1 SLIT1 SAA2 CCR6</i>                                                                                                                                                                                                                          |
| 7165  | signal transduction         | 7.15E-10 | 8.91E-08 | 52/202<br>25.7% | 1878/17784<br>10.5% | <i>OXTR CD83 CXCL8 RASEF ADRA1D CXCL1 CX3CL1 RND1 RAB43 SPRED1 FGF9 PLAUI CCR6 CA8 ICOSLG DUSP4 VAV3 IGFBP1 FGFBP1 ARL14 PRKCE WNT5A HUNK FOS SSTR2 DUSP6 MRAS IL1B TLR7 SOS1 CRYAB HBEGF ITPR1 TGFA DAPPI TNFRSF11A GNAI1 RASGRP3 IRAK2 TIFA SIPR3 STAT5A CCL22 NOS2 CCL20 NFKB2 APLN NFKBIA RCAN1 CXCL10 CXCL11 BCL3</i>                                                     |
| 40011 | locomotion                  | 1.19E-09 | 1.42E-07 | 23/202<br>11.3% | 440/17784<br>2.4%   | <i>VAV3 ROBO3 CCL22 CXCL8 CCL20 CXCL1 TNFRSF11A RNASE2 CXCL3 ETS1 CXCL2 CX3CL1 ICAM1 ROBO1 FOSL1 CXCL10 CXCL11 PLAUI IL1B SAA1 SLIT1 SAA2 CCR6</i>                                                                                                                                                                                                                             |
| 30155 | regulation of cell adhesion | 1.60E-09 | 1.84E-07 | 14/202          | 149/17784           | <i>STAT5A VAV3 CXCL8 CSF1 TESC LAMA4</i>                                                                                                                                                                                                                                                                                                                                       |

|       |                                  |          |          |                  |                     |      |                                                                                                                                                                                                                                                                                                                                                                                                                                                                                                                                                                                                                                                                                                                                   |
|-------|----------------------------------|----------|----------|------------------|---------------------|------|-----------------------------------------------------------------------------------------------------------------------------------------------------------------------------------------------------------------------------------------------------------------------------------------------------------------------------------------------------------------------------------------------------------------------------------------------------------------------------------------------------------------------------------------------------------------------------------------------------------------------------------------------------------------------------------------------------------------------------------|
|       |                                  |          |          |                  | 6.9%                | 0.8% | <i>SERPINE1 CX3CL1 ICAM1 RND1 PLAUI IL1B SAA1 SAA2</i>                                                                                                                                                                                                                                                                                                                                                                                                                                                                                                                                                                                                                                                                            |
| 50789 | regulation of biological process | 1.86E-09 | 2.06E-07 | 116/202<br>57.4% | 6552/17784<br>36.8% |      | <i>OXTR CD83 CSF1 SERPINE1 RASEF TBC1D3F IKZF3 ETS1 TBC1D3G ICAM1 NPPB RAB43 FGF9 PLAUI ZNF169 PHLDA1 ICOSLG IER3 IGFBP1 MEF2C MEF2B ARL14 PRKCE WNT5A BTC ITPR1 TGFA DAPP1 TNFRSF11A RASGRP3 WNT6 IRAK2 UBD PACSIN1 WNT4 STAT5A EGR1 EGR2 TNFRSF9 FOXP4 NFkB2 FOSL1 ABTB2 NFkBIA RCAN1 CXCL10 CXCL11 BCL3 MAFF CYP1A1 LCN2 LHX4 NFkBID TMEM9B SERPINA3 CXCL8 TNFAIP3 ADRAID CXCL1 AREG CX3CL1 ROBO1 RND1 DNMT3L SPRED1 CCR6 CA8 IKBKE LMCD1 MBL2 DUSP4 VAV3 FGFBP1 SERPINB2 UGT1A1 TESC HUNK FOS PROX1 SSTR2 DUSP6 RGMA ALDH1A3 MRAS IL1B IRF1 AHRR TLR7 NCOA7 SOS1 CRYAB HBEGF BIRC3 LAMA4 RGS16 FAM129A BARX2 GNAI1 RELB PALMD TIFA SLIT1 SIPR3 CCL22 NOS2 CCL20 WNT7B LGI3 SAMD4A CABLES1 GRHL3 APLN FABP6 SAA1 SAA2 FSBP</i> |
| 50794 | regulation of cellular process   | 4.37E-09 | 4.51E-07 | 111/202<br>54.9% | 6222/17784<br>34.9% |      | <i>OXTR CD83 CSF1 SERPINE1 RASEF TBC1D3F IKZF3 ETS1 TBC1D3G ICAM1 NPPB RAB43 FGF9 PLAUI ZNF169 PHLDA1 ICOSLG IER3 IGFBP1 MEF2C MEF2B ARL14 PRKCE WNT5A BTC ITPR1 TGFA DAPP1 TNFRSF11A RASGRP3 IRAK2 UBD PACSIN1 WNT4 STAT5A EGR1 EGR2 TNFRSF9 FOXP4 NFkB2 FOSL1 ABTB2 NFkBIA RCAN1 CXCL10 CXCL11 BCL3 MAFF CYP1A1 LCN2 LHX4 NFkBID TMEM9B CXCL8 TNFAIP3 ADRAID CXCL1 AREG CX3CL1 ROBO1 RND1 SPRED1 CCR6 CA8 IKBKE LMCD1 MBL2 DUSP4 VAV3 FGFBP1 SERPINB2 TESC HUNK FOS PROX1</i>                                                                                                                                                                                                                                                   |

|       |                            |        |          |          |                 |                                                                                                                                                                                                                                             |                                                                                                                                                                                                                                                                                                                                                                                                                                                                  |
|-------|----------------------------|--------|----------|----------|-----------------|---------------------------------------------------------------------------------------------------------------------------------------------------------------------------------------------------------------------------------------------|------------------------------------------------------------------------------------------------------------------------------------------------------------------------------------------------------------------------------------------------------------------------------------------------------------------------------------------------------------------------------------------------------------------------------------------------------------------|
|       |                            |        |          |          |                 | <i>SSTR2 DUSP6 ALDH1A3 MRAS IL1B IRF1 AHRR<br/>TLR7 NCOA7 SOS1 CRYAB HBEGF BIRC3 LAMA4<br/>RGS16 FAM129A BARX2 GNAI1 RELB PALMD TIFA<br/>SLIT1 SIPR3 CCL22 NOS2 CCL20 WNT7B LGI3<br/>SAMD4A CABLES1 GRHL3 APLN FABP6 SAA1<br/>SAA2 FSBP</i> |                                                                                                                                                                                                                                                                                                                                                                                                                                                                  |
| 6950  | response to stress         |        | 8.45E-09 | 8.15E-07 | 48/202<br>23.7% | 1775/17784<br>9.9%                                                                                                                                                                                                                          | <i>SERPINA3 OXTR CD83 CXCL8 TAT SERPINE1<br/>FAM129A ITPR1 CXCL1 CXCL3 CXCL2 CX3CL1<br/>MMP25 PLAUIRAK2 UBD TIFA OLR1 SIPR3 CCR6<br/>IKBKE ICOSLG MBL2 IGFBP1 SERPINB2 CCL22<br/>UGT1A1 NOS2 CCL20 WNT5A GRHL3 FOS DUSP6<br/>FOSL1 CXCL10 CXCL11 IL1B BCL3 MAFF CYP1A1<br/>SAA1 LCN2 AHRR SAA2 TLR7 FSBP CRYAB<br/>NFKBID</i>                                                                                                                                    |
| 6955  | immune response            |        | 9.22E-09 | 8.61E-07 | 26/202<br>12.8% | 619/17784<br>3.4%                                                                                                                                                                                                                           | <i>CD83 CXCL8 CXCL1 TNFRSF11A CXCL3 ETS1<br/>CXCL2 CX3CL1 ICAM1 RELB UBD CCR6 IKBKE<br/>MBL2 CCL22 NOS2 CCL20 WNT5A NFKB2 APLN<br/>CXCL10 CXCL11 IL1B BCL3 LCN2 TLR7</i>                                                                                                                                                                                                                                                                                         |
| 23052 | signaling                  |        | 9.54E-09 | 8.64E-07 | 69/202<br>34.1% | 3129/17784<br>17.5%                                                                                                                                                                                                                         | <i>OXTR CD83 CXCL8 RASEF ADRA1D CXCL1 AREG<br/>CX3CL1 ROBO1 RND1 NPPB RAB43 SPRED1<br/>FGF9 PLAUIRAK2 CA8 IKBKE ICOSLG DUSP4<br/>VAV3 IGFBP1 FGFBP1 ARL14 PRKCE WNT5A<br/>HUNK FOS SSTR2 DUSP6 MRAS SYPL1 SNPH IL1B<br/>TLR7 SOS1 CRYAB HBEGF BIRC3 NXPH3 ITPR1<br/>TGFA DAPP1 TNFRSF11A GNAI1 RASGRP3 WNT6<br/>IRAK2 TIFA SLIT1 SIPR3 NPTX1 WNT4 STAT5A<br/>EGR2 CCL22 NOS2 TIPARP CCL20 GAD1 WNT7B<br/>NFKB2 APLN NFKB1A RCANI CXCL10 GJB2<br/>CXCL11 BCL3</i> |
| 35556 | intracellular transduction | signal | 2.04E-08 | 1.79E-06 | 30/202<br>14.8% | 833/17784<br>4.6%                                                                                                                                                                                                                           | <i>OXTR CXCL8 RASEF TGFA ADRA1D GNAI1<br/>RASGRP3 RND1 RAB43 SPRED1 IRAK2 TIFA</i>                                                                                                                                                                                                                                                                                                                                                                               |

|       |                                              |            |          |          |                 |                     |                                                                                                                                                                                                                                                                                                                                                                                                                                                                                                                                  |
|-------|----------------------------------------------|------------|----------|----------|-----------------|---------------------|----------------------------------------------------------------------------------------------------------------------------------------------------------------------------------------------------------------------------------------------------------------------------------------------------------------------------------------------------------------------------------------------------------------------------------------------------------------------------------------------------------------------------------|
|       |                                              |            |          |          |                 |                     | <i>SIPR3 CA8 STAT5A DUSP4 VAV3 ARL14 NOS2 WNT5A SSTR2 DUSP6 NFKB1A RCAN1 MRAS IL1B BCL3 TLR7 SOS1 CRYAB</i>                                                                                                                                                                                                                                                                                                                                                                                                                      |
| 51240 | positive regulation of multicellular process | organismal | 2.11E-08 | 1.80E-06 | 17/202<br>8.4%  | 279/17784<br>1.5%   | <i>STAT5A OXTR CD83 CSF1 SERPINE1 WNT5A TNFRSF11A CX3CL1 BTC WNT6 FGF9 IL1B BCL3 SAA1 SAA2 TLR7 WNT4</i>                                                                                                                                                                                                                                                                                                                                                                                                                         |
| 32501 | multicellular process                        | organismal | 3.24E-08 | 2.69E-06 | 85/202<br>42.0% | 4376/17784<br>24.6% | <i>SERPINA3 ROBO3 OXTR DYRK3 CXCL8 CSF1 SERPINE1 TNFAIP2 ADRA1D CXCL1 IKZF3 CX3CL1 ACTG2 ROBO1 RND1 NPPB DNMT3L SPRED1 FGF9 PLAU ZC3H12A CYP1B1 OLR1 VAV3 IGFBP1 MEF2C MEF2B UGT1A1 WNT5A HUNK FOS PROX1 SSTR2 RGMA SLC7A5 ALDH1A3 MRAS SYPL1 SNPH IL1B IRF1 CDH11 AHRR ALPK3 MYH4 CRYAB HBEGF BIRC3 LAMA4 RGS16 ITPR1 TNFRSF11A BARX2 RELB WNT6 GJA10 UBD SLIT1 SIPR3 NPTX1 WNT4 STAT5A EGR1 EGR2 NOS2 TIPARP GAD1 WNT7B CABLES1 GRHL3 FOXN4 NFKB2 APLN FOSL1 RCAN1 CXCL10 GJB2 KRT17 DHRS9 BCL3 MAFF CYP1A1 SAA1 SAA2 LHX4</i> |
| 70887 | cellular response to chemical stimulus       |            | 3.35E-08 | 2.71E-06 | 20/202<br>9.9%  | 401/17784<br>2.2%   | <i>STAT5A IGFBP1 EGR1 CXCL8 UGT1A1 WNT7B SERPINE1 WNT5A FOS TNFRSF11A CXCL3 CX3CL1 WNT6 IL1B CYP1A1 SAA1 SLIT1 AHRR SAA2 WNT4</i>                                                                                                                                                                                                                                                                                                                                                                                                |
| 30593 | neutrophil chemotaxis                        |            | 4.78E-08 | 3.76E-06 | 6/202<br>2.9%   | 19/17784<br>0.1%    | <i>CXCL8 IL1B SAA1 SAA2 CXCL3 CX3CL1</i>                                                                                                                                                                                                                                                                                                                                                                                                                                                                                         |
| 9617  | response to bacterium                        |            | 6.77E-08 | 4.94E-06 | 15/202<br>7.4%  | 232/17784<br>1.3%   | <i>UGT1A1 NOS2 CCL20 SERPINE1 WNT5A FOS TNFRSF11A NFKB1A CXCL10 IRAK2 IL1B BCL3 CYP1A1 AHRR MBL2</i>                                                                                                                                                                                                                                                                                                                                                                                                                             |

|       |                                        |    |          |          |                 |                     |                                                                                                                                                                                                                                                                                                                                                                                                                                                                                                          |
|-------|----------------------------------------|----|----------|----------|-----------------|---------------------|----------------------------------------------------------------------------------------------------------------------------------------------------------------------------------------------------------------------------------------------------------------------------------------------------------------------------------------------------------------------------------------------------------------------------------------------------------------------------------------------------------|
| 32496 | response<br>lipopolysaccharide         | to | 9.39E-08 | 6.68E-06 | 11/202<br>5.4%  | 117/17784<br>0.6%   | <i>NFKBIA CXCL10 UGT1A1 IRAK2 IL1B SERPINE1<br/>WNT5A CYP1A1 AHRR FOS TNFRSF11A</i>                                                                                                                                                                                                                                                                                                                                                                                                                      |
| 42981 | regulation of apoptosis                |    | 1.21E-07 | 8.40E-06 | 29/202<br>14.3% | 852/17784<br>4.7%   | <i>SERPINE1 TNFAIP3 ETS1 CX3CL1 ROBO1 UBD<br/>IKBKE PHLDA1 IER3 STAT5A VAV3 MEF2C<br/>SERPINB2 PRKCE TNFRSF9 WNT5A DUSP6 BTC<br/>FOSL1 NFKBIA ALDH1A3 IL1B BCL3 LCN2 LHX4<br/>SOS1 CRYAB NFKBID BIRC3</i>                                                                                                                                                                                                                                                                                                |
| 43067 | regulation of programmed<br>cell death |    | 1.47E-07 | 9.92E-06 | 29/202<br>14.3% | 860/17784<br>4.8%   | <i>SERPINE1 TNFAIP3 ETS1 CX3CL1 ROBO1 UBD<br/>IKBKE PHLDA1 IER3 STAT5A VAV3 MEF2C<br/>SERPINB2 PRKCE TNFRSF9 WNT5A DUSP6 BTC<br/>FOSL1 NFKBIA ALDH1A3 IL1B BCL3 LCN2 LHX4<br/>SOS1 CRYAB NFKBID BIRC3</i>                                                                                                                                                                                                                                                                                                |
| 51707 | response to other organism             |    | 1.49E-07 | 9.92E-06 | 18/202<br>8.9%  | 358/17784<br>2.0%   | <i>CCL22 UGT1A1 NOS2 CCL20 SERPINE1 WNT5A<br/>FOS TNFRSF11A FOSL1 NFKBIA CXCL10 IRAK2<br/>IL1B BCL3 CYP1A1 AHRR TLR7 MBL2</i>                                                                                                                                                                                                                                                                                                                                                                            |
| 50896 | response to stimulus                   |    | 1.53E-07 | 9.92E-06 | 73/202<br>36.1% | 3634/17784<br>20.4% | <i>SERPINA3 ROBO3 OXTR CD83 CXCL8 TAT<br/>SERPINE1 CXCL1 CXCL3 ETS1 CXCL2 CX3CL1<br/>ICAM1 ROBO1 MMP25 PLA2 CYP1B1 OLR1 CCR6<br/>IKBKE ICOSLG MBL2 SLC34A3 DUSP4 IGFBP1<br/>SERPINB2 UGT1A1 WNT5A FOS RNASE2 SSTR2<br/>DUSP6 ALDH1A3 IL1B AHRR TLR7 MYH4 CRYAB<br/>ABCG2 FAM129A ITPR1 TNFRSF11A RELB WNT6<br/>IRAK2 GJA10 UBD TIFA SLIT1 SIPR3 WNT4<br/>STAT5A EGR1 EGR2 CCL22 NOS2 CCL20 WNT7B<br/>GRHL3 NFKB2 APLN FOSL1 NFKBIA CXCL10<br/>CXCL11 BCL3 MAFF CYP1A1 SAA1 LCN2 SAA2<br/>FSBP NFKBID</i> |
| 10941 | regulation of cell death               |    | 1.75E-07 | 1.11E-05 | 29/202<br>14.3% | 867/17784<br>4.8%   | <i>SERPINE1 TNFAIP3 ETS1 CX3CL1 ROBO1 UBD<br/>IKBKE PHLDA1 IER3 STAT5A VAV3 MEF2C<br/>SERPINB2 PRKCE TNFRSF9 WNT5A DUSP6 BTC</i>                                                                                                                                                                                                                                                                                                                                                                         |



|       |                                          |          |          |                 |                     |  |  |                                                                                                                                                                                                                                                                                                                                          |
|-------|------------------------------------------|----------|----------|-----------------|---------------------|--|--|------------------------------------------------------------------------------------------------------------------------------------------------------------------------------------------------------------------------------------------------------------------------------------------------------------------------------------------|
|       |                                          |          |          |                 |                     |  |  | <i>FOSL1 NFKBIA ALDH1A3 IL1B BCL3 LCN2 LHX4<br/>SOS1 CRYAB NFKBID BIRC3</i>                                                                                                                                                                                                                                                              |
| 9966  | regulation of signal transduction        | 2.07E-07 | 1.26E-05 | 27/202<br>13.3% | 773/17784<br>4.3%   |  |  | <i>CSF1 RGS16 SERPINE1 TGFA TBC1D3F TNFAIP3<br/>TNFRSF11A TBC1D3G ROBO1 RASGRP3 SPRED1<br/>FGF9 PLAUIRAK2 UBD TIFA SLIT1 IKBKE<br/>LMCD1 VAV3 WNT5A DUSP6 IL1B SOS1 NFKBID<br/>TMEM9B HBEGF</i>                                                                                                                                          |
| 23033 | signaling pathway                        | 2.27E-07 | 1.33E-05 | 50/202<br>24.7% | 2100/17784<br>11.8% |  |  | <i>OXTR CXCL8 RASEF ADRA1D CXCL1 AREG<br/>CX3CL1 ROBO1 RND1 NPPB RAB43 SPRED1<br/>FGF9 CA8 IKBKE DUSP4 VAV3 IGFBP1 ARL14<br/>PRKCE WNT5A FOS SSTR2 DUSP6 MRAS IL1B<br/>TLR7 SOS1 CRYAB HBEGF BIRC3 NXPH3 TGFA<br/>TNFRSF11A GNAI1 RASGRP3 WNT6 IRAK2 TIFA<br/>SLIT1 SIPR3 WNT4 STAT5A NOS2 TIPARP WNT7B<br/>NFKBIA RCAN1 CXCL10 BCL3</i> |
| 23051 | regulation of signaling process          | 2.36E-07 | 1.33E-05 | 27/202<br>13.3% | 778/17784<br>4.3%   |  |  | <i>CSF1 RGS16 SERPINE1 TGFA TBC1D3F TNFAIP3<br/>TNFRSF11A TBC1D3G ROBO1 RASGRP3 SPRED1<br/>FGF9 PLAUIRAK2 UBD TIFA SLIT1 IKBKE<br/>LMCD1 VAV3 WNT5A DUSP6 IL1B SOS1 NFKBID<br/>TMEM9B HBEGF</i>                                                                                                                                          |
| 2237  | response to molecule of bacterial origin | 2.36E-07 | 1.33E-05 | 11/202<br>5.4%  | 128/17784<br>0.7%   |  |  | <i>NFKBIA CXCL10 UGT1A1 IRAK2 IL1B SERPINE1<br/>WNT5A CYP1A1 AHRR FOS TNFRSF11A</i>                                                                                                                                                                                                                                                      |
| 10646 | regulation of cell communication         | 2.74E-07 | 1.51E-05 | 34/202<br>16.8% | 1154/17784<br>6.4%  |  |  | <i>OXTR CSF1 RGS16 SERPINE1 TGFA TBC1D3F<br/>TNFAIP3 TNFRSF11A TBC1D3G ROBO1 RASGRP3<br/>SPRED1 FGF9 PLAUIRAK2 UBD TIFA SLIT1<br/>IKBKE LMCD1 WNT4 VAV3 EGR1 EGR2 FGFBP1<br/>NOS2 WNT5A DUSP6 NFKBIA IL1B SOS1 NFKBID<br/>TMEM9B HBEGF</i>                                                                                               |
| 32101 | regulation of response to                | 3.07E-07 | 1.67E-05 | 13/202          | 192/17784           |  |  | <i>STAT5A CXCL8 SERPINE1 WNT5A TNFRSF11A</i>                                                                                                                                                                                                                                                                                             |

|       |                                              |  |          |          |                 |                     |                                                                                                                                                                                                                                                                                                          |
|-------|----------------------------------------------|--|----------|----------|-----------------|---------------------|----------------------------------------------------------------------------------------------------------------------------------------------------------------------------------------------------------------------------------------------------------------------------------------------------------|
|       | external stimulus                            |  |          |          | 6.4%            | 1.0%                | <i>CX3CL1 ROBO1 CXCL10 PLAUI IL1B SAA1 SAA2 TLR7</i>                                                                                                                                                                                                                                                     |
| 42127 | regulation of cell proliferation             |  | 3.79E-07 | 2.02E-05 | 28/202<br>13.8% | 848/17784<br>4.7%   | <i>CXCL8 CSF1 SERPINE1 TGFA ADRA1D CXCL1 TNFRSF11A ETS1 ROBO1 FGF9 PLAUI SLIT1 S1PR3 ICOSLG STAT5A FGFBP1 NOS2 TESC TNFRSF9 WNT5A PROX1 SSTR2 BTC FOSL1 NFKBIA CXCL10 FABP6 IL1B</i>                                                                                                                     |
| 48519 | negative regulation of biological process    |  | 4.53E-07 | 2.33E-05 | 48/202<br>23.7% | 2020/17784<br>11.3% | <i>CD83 CXCL8 RGS16 SERPINE1 FAM129A TNFAIP3 CXCL1 ETS1 BARX2 CX3CL1 ROBO1 RND1 NPPB FGF9 PLAUI UBD SLIT1 LMCD1 IER3 PACSIN1 WNT4 MBL2 STAT5A EGR1 MEF2C FGFBP1 SERPINB2 UGT1A1 TESC TNFRSF9 WNT5A PROX1 SSTR2 DUSP6 BTC FOSL1 NFKBIA CXCL10 FABP6 IL1B BCL3 SAA1 SAA2 LHX4 CRYAB NFKBID HBEGF BIRC3</i> |
| 51094 | positive regulation of developmental process |  | 4.83E-07 | 2.45E-05 | 17/202<br>8.4%  | 347/17784<br>1.9%   | <i>STAT5A OXTR CD83 CSF1 TESC WNT7B SERPINE1 WNT5A PROX1 ETS1 CX3CL1 ROBO1 BTC WNT6 FGF9 IL1B WNT4</i>                                                                                                                                                                                                   |
| 30595 | leukocyte chemotaxis                         |  | 5.01E-07 | 2.50E-05 | 7/202<br>3.4%   | 43/17784<br>0.2%    | <i>CXCL8 IL1B SAA1 SAA2 TNFRSF11A CXCL3 CX3CL1</i>                                                                                                                                                                                                                                                       |
| 7154  | cell communication                           |  | 5.33E-07 | 2.61E-05 | 27/202<br>13.3% | 811/17784<br>4.5%   | <i>OXTR ADRA1D TNFRSF11A AREG WNT6 FGF9 GJA10 TIFA SLIT1 NPTX1 WNT4 EGR2 FGFBP1 CCL22 CCL20 GAD1 WNT7B WNT5A FOS SSTR2 FOSL1 CXCL10 GJB2 CXCL11 SYPL1 SNPH IL1B</i>                                                                                                                                      |
| 50900 | leukocyte migration                          |  | 5.47E-07 | 2.64E-05 | 8/202<br>3.9%   | 63/17784<br>0.3%    | <i>CXCL8 IL1B SAA1 SAA2 TNFRSF11A CXCL3 CX3CL1 ICAM1</i>                                                                                                                                                                                                                                                 |
| 30879 | mammary gland development                    |  | 6.29E-07 | 2.93E-05 | 9/202<br>4.4%   | 87/17784<br>0.4%    | <i>STAT5A OXTR CSF1 WNT7B WNT5A TNFRSF11A ROBO1 WNT4 APLN</i>                                                                                                                                                                                                                                            |

|       |                                                      |          |          |                 |                    |                                                                                                                                                                                                       |
|-------|------------------------------------------------------|----------|----------|-----------------|--------------------|-------------------------------------------------------------------------------------------------------------------------------------------------------------------------------------------------------|
| 32103 | positive regulation of response to external stimulus | 6.29E-07 | 2.93E-05 | 9/202<br>4.4%   | 87/17784<br>0.4%   | <i>STAT5A CXCL10 CXCL8 IL1B SERPINE1 WNT5A TLR7 TNFRSF11A CX3CL1</i>                                                                                                                                  |
| 1775  | cell activation                                      | 6.38E-07 | 2.93E-05 | 15/202<br>7.4%  | 276/17784<br>1.5%  | <i>STAT5A EGR1 CXCL8 CSF1 CX3CL1 ICAM1 RELB NFKB2 UBD IRF1 BCL3 SAA1 SAA2 TLR7 ICOSLG</i>                                                                                                             |
| 32879 | regulation of localization                           | 8.33E-07 | 3.77E-05 | 25/202<br>12.3% | 728/17784<br>4.0%  | <i>OXTR CSF1 LAMA4 SERPINE1 TNFRSF11A ETS1 ICAM1 PLAUI SLIT1 PACSINI MBL2 NOS2 LGI3 WNT5A PROX1 BTC NFKBIA CXCL10 IL1B BCL3 SAA1 SAA2 TLR7 CRYAB HBEGF</i>                                            |
| 23034 | intracellular signaling pathway                      | 8.88E-07 | 3.96E-05 | 33/202<br>16.3% | 1158/17784<br>6.5% | <i>OXTR CXCL8 RASEF TGFA ADRA1D CXCL1 GNAI1 RASGRP3 RND1 RAB43 SPRED1 IRAK2 TIFA SIPR3 CA8 IKBKE STAT5A DUSP4 VAV3 ARL14 NOS2 PRKCE WNT5A SSTR2 DUSP6 NFKBIA RCANI MRAS IL1B BCL3 TLR7 SOS1 CRYAB</i> |
| 7267  | cell-cell signaling                                  | 9.59E-07 | 4.22E-05 | 22/202<br>10.8% | 587/17784<br>3.3%  | <i>OXTR FGFBP1 CCL22 CCL20 GAD1 WNT7B ADRA1D TNFRSF11A SSTR2 AREG WNT6 CXCL10 GJB2 CXCL11 FGF9 SYPL1 SNPH IL1B TIFA SLIT1 NPTX1 WNT4</i>                                                              |
| 60326 | cell chemotaxis                                      | 1.09E-06 | 4.73E-05 | 7/202<br>3.4%   | 48/17784<br>0.2%   | <i>CXCL8 IL1B SAA1 SAA2 TNFRSF11A CXCL3 CX3CL1</i>                                                                                                                                                    |
| 50793 | regulation of developmental process                  | 1.12E-06 | 4.79E-05 | 26/202<br>12.8% | 791/17784<br>4.4%  | <i>OXTR CD83 CSF1 LAMA4 SERPINE1 ETS1 CX3CL1 ROBO1 NPPB WNT6 FGF9 PALMD SLIT1 WNT4 STAT5A EGR2 TESC WNT7B WNT5A PROX1 BTC NFKBIA CXCL10 IL1B MAFF NFKBID</i>                                          |
| 42573 | retinoic acid metabolic process                      | 1.37E-06 | 5.75E-05 | 5/202<br>2.4%   | 18/17784<br>0.1%   | <i>ALDH1A3 DHRS9 UGT1A1 CYP1A1 AHRR</i>                                                                                                                                                               |
| 45787 | positive regulation of cell cycle                    | 1.39E-06 | 5.77E-05 | 8/202<br>3.9%   | 71/17784<br>0.3%   | <i>BTC STAT5A FOSL1 IL1B CYP1A1 TGFA AHRR PROX1</i>                                                                                                                                                   |

|       |                                               |          |          |                 |                    |                                                                                                                                                                                                                                                   |
|-------|-----------------------------------------------|----------|----------|-----------------|--------------------|---------------------------------------------------------------------------------------------------------------------------------------------------------------------------------------------------------------------------------------------------|
| 65008 | regulation of biological quality              | 1.59E-06 | 6.50E-05 | 39/202<br>19.3% | 1543/17784<br>8.6% | <i>SERPINA3 OXTR DYRK3 CSF1 SERPINE1 ITPR1 TNFRSF11A NPPB PALMD PLAU SLIT1 CYP1B1 SIPR3 CCR6 WNT4 MBL2 SLC34A3 STAT5A IGFBP1 EGR1 EGR2 UGT1A1 NOS2 GAD1 WNT7B NFKBIA ALDH1A3 DHRS9 SNPH IL1B BCL3 CYP1A1 SAA1 LCN2 AHRR SAA2 TLR7 CRYAB HBEGF</i> |
| 51716 | cellular response to stimulus                 | 2.55E-06 | 1.03E-04 | 29/202<br>14.3% | 989/17784<br>5.5%  | <i>CXCL8 SERPINE1 FAM129A TNFRSF11A CXCL3 CX3CL1 WNT6 IRAK2 SLIT1 IKBKE WNT4 STAT5A IGFBP1 EGR1 UGT1A1 WNT7B WNT5A FOS FOSL1 NFKBIA CXCL10 IL1B BCL3 CYP1A1 SAA1 AHRR SAA2 FSBP CRYAB</i>                                                         |
| 1819  | positive regulation of cytokine production    | 2.85E-06 | 1.14E-04 | 9/202<br>4.4%   | 104/17784<br>0.5%  | <i>CD83 IL1B SERPINE1 WNT5A BCL3 SAA1 SAA2 TLR7 CX3CL1</i>                                                                                                                                                                                        |
| 35466 | regulation of signaling pathway               | 3.36E-06 | 1.32E-04 | 29/202<br>14.3% | 1003/17784<br>5.6% | <i>CSF1 RGS16 TGFA TBC1D3F TNFAIP3 TNFRSF11A TBC1D3G ROBO1 RASGRP3 SPRED1 FGF9 IRAK2 UBD TIFA SLIT1 IKBKE LMCD1 WNT4 VAV3 FGFBP1 WNT5A DUSP6 RGMA NFKBIA IL1B SOS1 NFKBID TMEM9B HBEGF</i>                                                        |
| 1817  | regulation of cytokine production             | 3.67E-06 | 1.43E-04 | 12/202<br>5.9%  | 203/17784<br>1.1%  | <i>STAT5A CD83 IL1B IRF1 SERPINE1 WNT5A BCL3 SAA1 SAA2 TLR7 SIPR3 CX3CL1</i>                                                                                                                                                                      |
| 9607  | response to biotic stimulus                   | 3.78E-06 | 1.45E-04 | 18/202<br>8.9%  | 448/17784<br>2.5%  | <i>CCL22 UGT1A1 NOS2 CCL20 SERPINE1 WNT5A FOS TNFRSF11A FOSL1 NFKBIA CXCL10 IRAK2 IL1B BCL3 CYP1A1 AHRR TLR7 MBL2</i>                                                                                                                             |
| 23014 | signal transmission via phosphorylation event | 4.32E-06 | 1.61E-04 | 16/202<br>7.9%  | 364/17784<br>2.0%  | <i>STAT5A DUSP4 OXTR NOS2 WNT5A TGFA DUSP6 RASGRP3 NFKBIA SPRED1 IRAK2 IL1B BCL3 TIFA TLR7 CRYAB</i>                                                                                                                                              |
| 7243  | intracellular protein kinase                  | 4.32E-06 | 1.61E-04 | 16/202          | 364/17784          | <i>STAT5A DUSP4 OXTR NOS2 WNT5A TGFA DUSP6</i>                                                                                                                                                                                                    |

|       |                                                      |          |          |                 |                   |                                                                                                                                                                     |
|-------|------------------------------------------------------|----------|----------|-----------------|-------------------|---------------------------------------------------------------------------------------------------------------------------------------------------------------------|
|       | cascade                                              |          |          | 7.9%            | 2.0%              | <i>RASGRP3 NFKBIA SPRED1 IRAK2 IL1B BCL3 TIFA TLR7 CRYAB</i>                                                                                                        |
| 31349 | positive regulation of defense response              | 4.59E-06 | 1.68E-04 | 8/202<br>3.9%   | 83/17784<br>0.4%  | <i>STAT5A NFKBIA IRAK2 IL1B SERPINE1 TLR7 TNFRSF11A CX3CL1</i>                                                                                                      |
| 7567  | parturition                                          | 5.01E-06 | 1.80E-04 | 4/202<br>1.9%   | 11/17784<br>0.0%  | <i>OXTR MAFF CYP1A1 AHRR</i>                                                                                                                                        |
| 10628 | positive regulation of gene expression               | 5.41E-06 | 1.92E-04 | 21/202<br>10.3% | 603/17784<br>3.3% | <i>STAT5A EGR1 MEF2C EGR2 CSF1 TESC WNT5A GRHL3 FOS PROX1 ETS1 BARX2 RELB FOSL1 NFKBIA WNT6 IL1B IRF1 BCL3 TIFA WNT4</i>                                            |
| 45750 | positive regulation of S phase of mitotic cell cycle | 5.73E-06 | 1.97E-04 | 3/202<br>1.4%   | 4/17784<br>0.0%   | <i>CYP1A1 AHRR PROX1</i>                                                                                                                                            |
| 60137 | maternal process involved in parturition             | 5.73E-06 | 1.97E-04 | 3/202<br>1.4%   | 4/17784<br>0.0%   | <i>OXTR CYP1A1 AHRR</i>                                                                                                                                             |
| 10033 | response to organic substance                        | 6.34E-06 | 2.15E-04 | 26/202<br>12.8% | 870/17784<br>4.8% | <i>OXTR CD83 TAT SERPINE1 TNFRSF11A IRAK2 UBD SLIT1 CYP1B1 WNT4 STAT5A DUSP4 IGFBP1 EGR1 EGR2 UGT1A1 WNT5A FOS DUSP6 FOSL1 NFKBIA CXCL10 IL1B CYP1A1 AHRR CRYAB</i> |
| 50729 | positive regulation of inflammatory response         | 6.44E-06 | 2.16E-04 | 6/202<br>2.9%   | 41/17784<br>0.2%  | <i>STAT5A IL1B SERPINE1 TLR7 TNFRSF11A CX3CL1</i>                                                                                                                   |
| 2682  | regulation of immune system process                  | 7.30E-06 | 2.42E-04 | 17/202<br>8.4%  | 424/17784<br>2.3% | <i>STAT5A CD83 CSF1 NOS2 TESC SERPINE1 WNT5A ETS1 ICAM1 NFKBIA CXCL10 IRAK2 IL1B TLR7 NFKBID ICOSLG MBL2</i>                                                        |
| 31328 | positive regulation of cellular biosynthetic process | 7.82E-06 | 2.57E-04 | 23/202<br>11.3% | 720/17784<br>4.0% | <i>STAT5A EGR1 MEF2C EGR2 TESC WNT5A FAM129A SAMD4A GRHL3 FOS PROX1 AREG ETS1 BARX2 ICAM1 FOSL1 NFKBIA IL1B IRF1 BCL3 TIFA TLR7 WNT4</i>                            |

|       |                                                           |          |          |                 |                   |                                                                                                                                                                    |
|-------|-----------------------------------------------------------|----------|----------|-----------------|-------------------|--------------------------------------------------------------------------------------------------------------------------------------------------------------------|
| 48514 | blood vessel morphogenesis                                | 8.36E-06 | 2.69E-04 | 12/202<br>5.9%  | 220/17784<br>1.2% | <i>VAV3 CXCL8 FGF9 NOS2 TIPARP PLAU WNT7B<br/>ZC3H12A TNFAIP2 PROX1 CX3CL1 ROBO1</i>                                                                               |
| 48583 | regulation of response to stimulus                        | 9.04E-06 | 2.85E-04 | 19/202<br>9.4%  | 525/17784<br>2.9% | <i>STAT5A CXCL8 NOS2 SERPINE1 WNT5A<br/>TNFRSF11A CX3CL1 ICAM1 ROBO1 NFKBIA<br/>CXCL10 PLAU IRAK2 IL1B SAA1 SAA2 TLR7<br/>HBEGF MBL2</i>                           |
| 10557 | positive regulation of macromolecule biosynthetic process | 9.13E-06 | 2.85E-04 | 22/202<br>10.8% | 675/17784<br>3.7% | <i>STAT5A EGR1 MEF2C EGR2 TESC WNT5A<br/>FAM129A SAMD4A GRHL3 FOS PROX1 AREG<br/>ETS1 BARX2 FOSL1 NFKBIA IL1B IRF1 BCL3 TIFA<br/>TLR7 WNT4</i>                     |
| 50727 | regulation of inflammatory response                       | 9.15E-06 | 2.85E-04 | 8/202<br>3.9%   | 91/17784<br>0.5%  | <i>STAT5A IL1B SERPINE1 SAA1 SAA2 TLR7<br/>TNFRSF11A CX3CL1</i>                                                                                                    |
| 90068 | positive regulation of cell cycle process                 | 9.82E-06 | 3.03E-04 | 6/202<br>2.9%   | 44/17784<br>0.2%  | <i>BTC IL1B CYP1A1 TGFA AHRR PROX1</i>                                                                                                                             |
| 9891  | positive regulation of biosynthetic process               | 9.99E-06 | 3.05E-04 | 23/202<br>11.3% | 731/17784<br>4.1% | <i>STAT5A EGR1 MEF2C EGR2 TESC WNT5A<br/>FAM129A SAMD4A GRHL3 FOS PROX1 AREG<br/>ETS1 BARX2 ICAM1 FOSL1 NFKBIA IL1B IRF1<br/>BCL3 TIFA TLR7 WNT4</i>               |
| 51704 | multi-organism process                                    | 1.04E-05 | 3.14E-04 | 24/202<br>11.8% | 786/17784<br>4.4% | <i>STAT5A OXTR CCL22 UGT1A1 NOS2 CCL20<br/>SERPINE1 WNT5A FOS TNFRSF11A ICAM1 FOSL1<br/>NFKBIA CXCL10 PLAU IRAK2 IL1B BCL3 MAFF<br/>CYP1A1 AHRR TLR7 WNT4 MBL2</i> |
| 34754 | cellular hormone metabolic process                        | 1.07E-05 | 3.18E-04 | 7/202<br>3.4%   | 67/17784<br>0.3%  | <i>ALDH1A3 DHRS9 UGT1A1 CYP1A1 CYP1B1 AHRR<br/>WNT4</i>                                                                                                            |
| 1568  | blood vessel development                                  | 1.10E-05 | 3.20E-04 | 13/202<br>6.4%  | 265/17784<br>1.4% | <i>VAV3 CXCL8 NOS2 TIPARP WNT7B LAMA4<br/>TNFAIP2 PROX1 CX3CL1 ROBO1 FGF9 PLAU<br/>ZC3H12A</i>                                                                     |

|       |                                              |          |          |                 |                     |                                                                                                                            |
|-------|----------------------------------------------|----------|----------|-----------------|---------------------|----------------------------------------------------------------------------------------------------------------------------|
| 2684  | positive regulation of immune system process | 1.10E-05 | 3.20E-04 | 13/202<br>6.4%  | 265/17784<br>1.4%   | <i>STAT5A CD83 NOS2 SERPINE1 WNT5A ICAM1 NFKBIA CXCL10 IRAK2 IL1B TLR7 ICOSLG MBL2</i>                                     |
| 48584 | positive regulation of response to stimulus  | 1.24E-05 | 3.57E-04 | 13/202<br>6.4%  | 268/17784<br>1.5%   | <i>STAT5A CXCL8 SERPINE1 WNT5A TNFRSF11A CX3CL1 NFKBIA CXCL10 IRAK2 IL1B TLR7 HBEGF MBL2</i>                               |
| 70365 | hepatocyte differentiation                   | 1.42E-05 | 3.89E-04 | 3/202<br>1.4%   | 5/17784<br>0.0%     | <i>CYP1A1 AHRR PROX1</i>                                                                                                   |
| 42904 | 9-cis-retinoic acid biosynthetic process     | 1.42E-05 | 3.89E-04 | 3/202<br>1.4%   | 5/17784<br>0.0%     | <i>DHRS9 CYP1A1 AHRR</i>                                                                                                   |
| 42905 | 9-cis-retinoic acid metabolic process        | 1.42E-05 | 3.89E-04 | 3/202<br>1.4%   | 5/17784<br>0.0%     | <i>DHRS9 CYP1A1 AHRR</i>                                                                                                   |
| 35238 | vitamin A biosynthetic process               | 1.42E-05 | 3.89E-04 | 3/202<br>1.4%   | 5/17784<br>0.0%     | <i>DHRS9 CYP1A1 AHRR</i>                                                                                                   |
| 60900 | embryonic camera-type eye formation          | 1.42E-05 | 3.89E-04 | 3/202<br>1.4%   | 5/17784<br>0.0%     | <i>ALDH1A3 WNT5A PROX1</i>                                                                                                 |
| 45321 | leukocyte activation                         | 1.49E-05 | 4.05E-04 | 12/202<br>5.9%  | 233/17784<br>1.3%   | <i>STAT5A EGR1 CXCL8 CSF1 UBD IRF1 BCL3 TLR7 ICOSLG CX3CL1 ICAM1 RELB</i>                                                  |
| 1944  | vasculature development                      | 1.51E-05 | 4.07E-04 | 13/202<br>6.4%  | 273/17784<br>1.5%   | <i>VAV3 CXCL8 NOS2 TIPARP WNT7B LAMA4 TNFAIP2 PROX1 CX3CL1 ROBO1 FGF9 PLAUG ZC3H12A</i>                                    |
| 31347 | regulation of defense response               | 1.65E-05 | 4.42E-04 | 10/202<br>4.9%  | 162/17784<br>0.9%   | <i>STAT5A NFKBIA IRAK2 IL1B SERPINE1 SAA1 SAA2 TLR7 TNFRSF11A CX3CL1</i>                                                   |
| 48523 | negative regulation of cellular process      | 1.91E-05 | 5.04E-04 | 41/202<br>20.2% | 1843/17784<br>10.3% | <i>CXCL8 RGS16 SERPINE1 FAM129A TNFAIP3 CXCL1 ETS1 BARX2 CX3CL1 ROBO1 RND1 NPPB FGF9 UBD SLIT1 LMCD1 IER3 PACSINI WNT4</i> |

|       |                                                      |          |          |                 |                    |                                                                                                                                                                                                       |
|-------|------------------------------------------------------|----------|----------|-----------------|--------------------|-------------------------------------------------------------------------------------------------------------------------------------------------------------------------------------------------------|
|       |                                                      |          |          |                 |                    | <i>STAT5A EGR1 MEF2C FGFBP1 SERPINB2 TESC TNFRSF9 WNT5A PROX1 SSTR2 DUSP6 BTC FOSL1 NFKBIA FABP6 IL1B BCL3 LHX4 CRYAB NFKBID HBEGF BIRC3</i>                                                          |
| 7166  | cell surface receptor linked signaling pathway       | 1.99E-05 | 5.20E-04 | 32/202<br>15.8% | 1280/17784<br>7.1% | <i>OXTR CXCL8 NXPH3 ADRA1D CXCL1 TNFRSF11A AREG CX3CL1 GNAI1 ROBO1 NPPB WNT6 FGF9 IRAK2 SLIT1 SIPR3 WNT4 STAT5A VAV3 IGFBP1 NOS2 TIPARP WNT7B WNT5A FOS SSTR2 NFKBIA CXCL10 IL1B SOS1 HBEGF BIRC3</i> |
| 1523  | retinoid metabolic process                           | 2.04E-05 | 5.20E-04 | 5/202<br>2.4%   | 30/17784<br>0.1%   | <i>ALDH1A3 DHRS9 UGT1A1 CYP1A1 AHRR</i>                                                                                                                                                               |
| 6776  | vitamin A metabolic process                          | 2.04E-05 | 5.20E-04 | 5/202<br>2.4%   | 30/17784<br>0.1%   | <i>ALDH1A3 DHRS9 UGT1A1 CYP1A1 AHRR</i>                                                                                                                                                               |
| 16101 | diterpenoid metabolic process                        | 2.04E-05 | 5.20E-04 | 5/202<br>2.4%   | 30/17784<br>0.1%   | <i>ALDH1A3 DHRS9 UGT1A1 CYP1A1 AHRR</i>                                                                                                                                                               |
| 42108 | positive regulation of cytokine biosynthetic process | 2.35E-05 | 5.94E-04 | 6/202<br>2.9%   | 51/17784<br>0.2%   | <i>STAT5A IL1B IRF1 WNT5A BCL3 TLR7</i>                                                                                                                                                               |
| 43066 | negative regulation of apoptosis                     | 2.71E-05 | 6.81E-04 | 15/202<br>7.4%  | 376/17784<br>2.1%  | <i>STAT5A MEF2C SERPINB2 SERPINE1 WNT5A TNFAIP3 CX3CL1 BTC NFKBIA IL1B BCL3 LHX4 CRYAB IER3 BIRC3</i>                                                                                                 |
| 42362 | fat-soluble vitamin biosynthetic process             | 2.82E-05 | 7.01E-04 | 3/202<br>1.4%   | 6/17784<br>0.0%    | <i>DHRS9 CYP1A1 AHRR</i>                                                                                                                                                                              |
| 34097 | response to cytokine stimulus                        | 3.01E-05 | 7.43E-04 | 8/202<br>3.9%   | 107/17784<br>0.6%  | <i>FOSL1 OXTR IRAK2 UBD SERPINE1 WNT5A FOS TNFRSF11A</i>                                                                                                                                              |
| 6928  | cellular movement component                          | 3.06E-05 | 7.49E-04 | 17/202<br>8.4%  | 474/17784<br>2.6%  | <i>VAV3 ROBO3 EGR2 CCL22 CXCL8 TNFRSF11A CXCL3 ETS1 CX3CL1 ICAM1 ROBO1 IL1B SAA1</i>                                                                                                                  |



|       |                                              |           |          |          |                 |                    |                                                                                                                                                                                             |                             |
|-------|----------------------------------------------|-----------|----------|----------|-----------------|--------------------|---------------------------------------------------------------------------------------------------------------------------------------------------------------------------------------------|-----------------------------|
|       |                                              |           |          |          |                 |                    |                                                                                                                                                                                             | <i>SLIT1 SAA2 CCR6 LHX4</i> |
| 43069 | negative regulation of programmed cell death | of        | 3.16E-05 | 7.67E-04 | 15/202<br>7.4%  | 381/17784<br>2.1%  | <i>STAT5A MEF2C SERPINB2 SERPINE1 WNT5A TNFAIP3 CX3CL1 BTC NFKBIA IL1B BCL3 LHX4 CRYAB IER3 BIRC3</i>                                                                                       |                             |
| 71222 | cellular response to lipopolysaccharide      | to        | 3.42E-05 | 8.26E-04 | 4/202<br>1.9%   | 17/17784<br>0.0%   | <i>NFKBIA IRAK2 SERPINE1 WNT5A</i>                                                                                                                                                          |                             |
| 9893  | positive regulation of metabolic process     | of        | 3.50E-05 | 8.37E-04 | 27/202<br>13.3% | 1018/17784<br>5.7% | <i>CSF1 FAM129A AREG ETS1 BARX2 ICAM1 RELB WNT6 TIFA WNT4 STAT5A VAV3 EGR1 MEF2C EGR2 TESC WNT5A SAMD4A GRHL3 FOS PROX1 FOSL1 NFKBIA IL1B IRF1 BCL3 TLR7</i>                                |                             |
| 60548 | negative regulation of cell death            |           | 4.00E-05 | 9.50E-04 | 15/202<br>7.4%  | 389/17784<br>2.1%  | <i>STAT5A MEF2C SERPINB2 SERPINE1 WNT5A TNFAIP3 CX3CL1 BTC NFKBIA IL1B BCL3 LHX4 CRYAB IER3 BIRC3</i>                                                                                       |                             |
| 48589 | developmental growth                         |           | 4.18E-05 | 9.83E-04 | 8/202<br>3.9%   | 112/17784<br>0.6%  | <i>IGFBP1 CSF1 PLAU WNT7B SERPINE1 WNT5A SLIT1 ROBO1</i>                                                                                                                                    |                             |
| 48534 | hemopoietic or lymphoid organ development    |           | 4.22E-05 | 9.87E-04 | 12/202<br>5.9%  | 259/17784<br>1.4%  | <i>STAT5A EGR1 DYRK3 CSF1 TIPARP UBD IRF1 WNT5A BCL3 TNFRSF11A RELB NFKB2</i>                                                                                                               |                             |
| 9653  | anatomical structure morphogenesis           | structure | 4.85E-05 | 1.11E-03 | 30/202<br>14.8% | 1217/17784<br>6.8% | <i>ROBO3 CXCL8 CSF1 SERPINE1 TNFAIP2 BARX2 CX3CL1 ROBO1 NPPB WNT6 FGF9 PLAU ZC3H12A SLIT1 SIPR3 IER3 WNT4 STAT5A VAV3 IGFBP1 EGR2 NOS2 TIPARP WNT7B WNT5A PROX1 RGMA ALDH1A3 LHX4 CRYAB</i> |                             |
| 42537 | benzene and derivative metabolic process     |           | 4.89E-05 | 1.11E-03 | 3/202<br>1.4%   | 7/17784<br>0.0%    | <i>UGT1A1 CYP1A1 AHRR</i>                                                                                                                                                                   |                             |
| 48247 | lymphocyte chemotaxis                        |           | 4.89E-05 | 1.11E-03 | 3/202<br>1.4%   | 7/17784<br>0.0%    | <i>SAA1 SAA2 CX3CL1</i>                                                                                                                                                                     |                             |

|       |                                                        |          |          |                 |                    |                                                                                                                                                                                                                                   |
|-------|--------------------------------------------------------|----------|----------|-----------------|--------------------|-----------------------------------------------------------------------------------------------------------------------------------------------------------------------------------------------------------------------------------|
| 61180 | mammary gland epithelium development                   | 5.09E-05 | 1.15E-03 | 5/202<br>2.4%   | 36/17784<br>0.2%   | <i>CSF1 WNT7B WNT5A ROBO1 WNT4</i>                                                                                                                                                                                                |
| 9991  | response to extracellular stimulus                     | 5.27E-05 | 1.18E-03 | 12/202<br>5.9%  | 265/17784<br>1.4%  | <i>SLC34A3 FOSL1 WNT6 CXCL10 UGT1A1 IL1B WNT7B WNT5A CYP1A1 AHRR FOS SSTR2</i>                                                                                                                                                    |
| 60560 | developmental growth involved in morphogenesis         | 5.48E-05 | 1.22E-03 | 4/202<br>1.9%   | 19/17784<br>0.1%   | <i>CSF1 WNT7B WNT5A ROBO1</i>                                                                                                                                                                                                     |
| 14070 | response to organic cyclic substance                   | 5.50E-05 | 1.22E-03 | 9/202<br>4.4%   | 150/17784<br>0.8%  | <i>FOSL1 OXTR CD83 IL1B TAT CYP1A1 AHRR FOS DUSP6</i>                                                                                                                                                                             |
| 30154 | cell differentiation                                   | 5.61E-05 | 1.23E-03 | 37/202<br>18.3% | 1668/17784<br>9.3% | <i>ROBO3 DYRK3 CSF1 LAMA4 TNFAIP2 TNFRSF11A BARX2 ROBO1 RELB RND1 WNT6 FGF9 UBD ZC3H12A SLIT1 WNT4 STAT5A EGR1 MEF2C EGR2 NOS2 TIPARP WNT7B WNT5A FOXN4 PROX1 DUSP6 NFKB2 SLC7A5 RCAN1 DHRS9 IRF1 BCL3 CYP1A1 AHRR LHX4 CRYAB</i> |
| 6721  | terpenoid metabolic process                            | 6.66E-05 | 1.43E-03 | 5/202<br>2.4%   | 38/17784<br>0.2%   | <i>ALDH1A3 DHRS9 UGT1A1 CYP1A1 AHRR</i>                                                                                                                                                                                           |
| 51674 | localization of cell                                   | 6.67E-05 | 1.43E-03 | 13/202<br>6.4%  | 315/17784<br>1.7%  | <i>VAV3 CCL22 CXCL8 TNFRSF11A CXCL3 ETS1 CX3CL1 ICAM1 ROBO1 IL1B SAA1 SLIT1 SAA2</i>                                                                                                                                              |
| 48870 | cell motility                                          | 6.67E-05 | 1.43E-03 | 13/202<br>6.4%  | 315/17784<br>1.7%  | <i>VAV3 CCL22 CXCL8 TNFRSF11A CXCL3 ETS1 CX3CL1 ICAM1 ROBO1 IL1B SAA1 SLIT1 SAA2</i>                                                                                                                                              |
| 71219 | cellular response to molecule of bacterial origin      | 6.79E-05 | 1.44E-03 | 4/202<br>1.9%   | 20/17784<br>0.1%   | <i>NFKBIA IRAK2 SERPINE1 WNT5A</i>                                                                                                                                                                                                |
| 10604 | positive regulation of macromolecule metabolic process | 6.80E-05 | 1.44E-03 | 25/202<br>12.3% | 941/17784<br>5.2%  | <i>CSF1 FAM129A AREG ETS1 BARX2 RELB WNT6 TIFA WNT4 STAT5A EGR1 MEF2C EGR2 TESC WNT5A SAMD4A GRHL3 FOS PROX1 FOSL1 NFKBIA IL1B IRF1 BCL3 TLR7</i>                                                                                 |

|       |                                                            |          |          |                |                   |                                                                                                                      |
|-------|------------------------------------------------------------|----------|----------|----------------|-------------------|----------------------------------------------------------------------------------------------------------------------|
| 19748 | secondary metabolic process                                | 7.22E-05 | 1.52E-03 | 6/202<br>2.9%  | 62/17784<br>0.3%  | <i>ALDH1A3 DHRS9 UGT1A1 CYP1A1 CYP1B1 AHRR</i>                                                                       |
| 48732 | gland development                                          | 7.37E-05 | 1.54E-03 | 10/202<br>4.9% | 193/17784<br>1.0% | <i>STAT5A ALDH1A3 OXTR CSF1 WNT7B WNT5A TNFRSF11A ROBO1 WNT4 APLN</i>                                                |
| 30097 | hemopoiesis                                                | 7.47E-05 | 1.55E-03 | 11/202<br>5.4% | 233/17784<br>1.3% | <i>STAT5A EGR1 DYRK3 CSF1 TIPARP UBD IRF1 WNT5A BCL3 TNFRSF11A RELB</i>                                              |
| 2520  | immune system development                                  | 7.52E-05 | 1.55E-03 | 12/202<br>5.9% | 275/17784<br>1.5% | <i>STAT5A EGR1 DYRK3 CSF1 TIPARP UBD IRF1 WNT5A BCL3 TNFRSF11A RELB NFKB2</i>                                        |
| 6953  | acute-phase response                                       | 7.57E-05 | 1.55E-03 | 5/202<br>2.4%  | 39/17784<br>0.2%  | <i>SERPINA3 TIFA SAA1 SAA2 MBL2</i>                                                                                  |
| 9404  | toxin metabolic process                                    | 7.75E-05 | 1.57E-03 | 3/202<br>1.4%  | 8/17784<br>0.0%   | <i>CYP1A1 CYP1B1 AHRR</i>                                                                                            |
| 80134 | regulation of response to stress                           | 7.82E-05 | 1.57E-03 | 13/202<br>6.4% | 320/17784<br>1.7% | <i>STAT5A SERPINE1 WNT5A TNFRSF11A CX3CL1 NFKBIA PLAUI IRAK2 IL1B SAA1 SAA2 TLR7 HBEGF</i>                           |
| 51101 | regulation of DNA binding                                  | 7.83E-05 | 1.57E-03 | 9/202<br>4.4%  | 157/17784<br>0.8% | <i>NFKBIA IRAK2 IL1B WNT5A BCL3 PROX1 TNFRSF11A NFKBID ICAMI</i>                                                     |
| 7223  | Wnt receptor signaling pathway, calcium modulating pathway | 8.31E-05 | 1.66E-03 | 4/202<br>1.9%  | 21/17784<br>0.1%  | <i>WNT6 WNT7B WNT5A WNT4</i>                                                                                         |
| 6775  | fat-soluble vitamin metabolic process                      | 8.57E-05 | 1.70E-03 | 5/202<br>2.4%  | 40/17784<br>0.2%  | <i>ALDH1A3 DHRS9 UGT1A1 CYP1A1 AHRR</i>                                                                              |
| 51173 | positive regulation of nitrogen compound metabolic process | 9.33E-05 | 1.83E-03 | 20/202<br>9.9% | 677/17784<br>3.8% | <i>STAT5A EGR1 MEF2C EGR2 TESC WNT5A GRHL3 FOS PROX1 AREG ETS1 BARX2 ICAMI FOSL1 NFKBIA IL1B IRF1 BCL3 TIFA WNT4</i> |

|       |                                              |          |          |                 |                    |                                                                                                                                                                                                                                    |
|-------|----------------------------------------------|----------|----------|-----------------|--------------------|------------------------------------------------------------------------------------------------------------------------------------------------------------------------------------------------------------------------------------|
| 51270 | regulation of cellular component movement    | 9.38E-05 | 1.83E-03 | 11/202<br>5.4%  | 239/17784<br>1.3%  | <i>CXCL10 CSF1 PLAU LAMA4 SERPINE1 WNT5A SLIT1 PROX1 ETS1 ICAM1 HBEGF</i>                                                                                                                                                          |
| 6916  | anti-apoptosis                               | 9.51E-05 | 1.84E-03 | 10/202<br>4.9%  | 199/17784<br>1.1%  | <i>STAT5A NFKBIA MEF2C SERPINB2 IL1B TNFAIP3 LHX4 CRYAB IER3 BIRC3</i>                                                                                                                                                             |
| 16477 | cell migration                               | 9.55E-05 | 1.84E-03 | 12/202<br>5.9%  | 282/17784<br>1.5%  | <i>VAV3 CCL22 CXCL8 IL1B SAA1 SLIT1 SAA2 TNFRSF11A CXCL3 CX3CL1 ICAM1 ROBO1</i>                                                                                                                                                    |
| 48869 | cellular process                             | 9.89E-05 | 1.87E-03 | 37/202<br>18.3% | 1714/17784<br>9.6% | <i>ROBO3 DYRK3 CSF1 LAMA4 TNFAIP2 TNFRSF11A BARX2 ROBO1 RELB RND1 WNT6 FGF9 UBD ZC3H12A SLIT1 WNT4 STAT5A EGR1 MEF2C EGR2 NOS2 TIPARP WNT7B WNT5A FOXN4 PROX1 DUSP6 NFKB2 SLC7A5 RCAN1 DHRS9 IRF1 BCL3 CYP11A1 AHRR LHX4 CRYAB</i> |
| 42060 | wound healing                                | 9.91E-05 | 1.87E-03 | 10/202<br>4.9%  | 200/17784<br>1.1%  | <i>IGFBP1 SERPINB2 PLAU IL1B SERPINE1 WNT5A SAA1 SAA2 GRHL3 CX3CL1</i>                                                                                                                                                             |
| 45931 | positive regulation of mitotic cell cycle    | 1.01E-04 | 1.87E-03 | 4/202<br>1.9%   | 22/17784<br>0.1%   | <i>STAT5A CYP11A1 AHRR PROX1</i>                                                                                                                                                                                                   |
| 35567 | non-canonical Wnt receptor signaling pathway | 1.01E-04 | 1.87E-03 | 4/202<br>1.9%   | 22/17784<br>0.1%   | <i>WNT6 WNT7B WNT5A WNT4</i>                                                                                                                                                                                                       |
| 60603 | mammary gland duct morphogenesis             | 1.01E-04 | 1.87E-03 | 4/202<br>1.9%   | 22/17784<br>0.1%   | <i>CSF1 WNT5A ROBO1 WNT4</i>                                                                                                                                                                                                       |
| 40012 | regulation of locomotion                     | 1.01E-04 | 1.87E-03 | 11/202<br>5.4%  | 241/17784<br>1.3%  | <i>CXCL10 CXCL8 CSF1 PLAU LAMA4 SERPINE1 WNT5A PROX1 ICAM1 ROBO1 HBEGF</i>                                                                                                                                                         |
| 2521  | leukocyte differentiation                    | 1.02E-04 | 1.88E-03 | 8/202<br>3.9%   | 127/17784<br>0.7%  | <i>STAT5A EGR1 CSF1 UBD IRF1 BCL3 TNFRSF11A RELB</i>                                                                                                                                                                               |
| 48646 | anatomical structure                         | 1.02E-04 | 1.88E-03 | 14/202          | 375/17784          | <i>VAV3 EGR2 CXCL8 WNT5A TNFAIP2 PROX1</i>                                                                                                                                                                                         |

|       |                                           |          |          |                 |                   |                                                                                                           |
|-------|-------------------------------------------|----------|----------|-----------------|-------------------|-----------------------------------------------------------------------------------------------------------|
|       | formation involved in morphogenesis       |          |          | 6.9%            | 2.1%              | <i>CX3CL1 ROBO1 RGMA ALDH1A3 FGF9 PLAUC3H12A WNT4</i>                                                     |
| 45941 | positive regulation of transcription      | 1.03E-04 | 1.88E-03 | 18/202<br>8.9%  | 575/17784<br>3.2% | <i>STAT5A EGR1 MEF2C EGR2 TESC WNT5A GRHL3 FOS PROX1 ETS1 BARX2 FOSL1 NFKBIA IL1B IRF1 BCL3 TIFA WNT4</i> |
| 8285  | negative regulation of cell proliferation | 1.14E-04 | 2.07E-03 | 14/202<br>6.9%  | 379/17784<br>2.1% | <i>FGFBP1 CXCL8 TESC TNFRSF9 WNT5A CXCL1 PROX1 SSTR2 ETS1 ROBO1 FOSL1 FABP6 IL1B SLIT1</i>                |
| 51384 | response to glucocorticoid stimulus       | 1.19E-04 | 2.14E-03 | 7/202<br>3.4%   | 97/17784<br>0.5%  | <i>FOSL1 UGT1A1 IL1B TAT SERPINE1 SLIT1 FOS</i>                                                           |
| 17143 | insecticide metabolic process             | 1.28E-04 | 2.22E-03 | 2/202<br>0.9%   | 2/17784<br>0.0%   | <i>CYP1A1 AHRR</i>                                                                                        |
| 9635  | response to herbicide                     | 1.28E-04 | 2.22E-03 | 2/202<br>0.9%   | 2/17784<br>0.0%   | <i>CYP1A1 AHRR</i>                                                                                        |
| 2266  | follicular dendritic cell activation      | 1.28E-04 | 2.22E-03 | 2/202<br>0.9%   | 2/17784<br>0.0%   | <i>BCL3 NFKB2</i>                                                                                         |
| 2268  | follicular dendritic cell differentiation | 1.28E-04 | 2.22E-03 | 2/202<br>0.9%   | 2/17784<br>0.0%   | <i>BCL3 NFKB2</i>                                                                                         |
| 19341 | dibenzo-p-dioxin catabolic process        | 1.28E-04 | 2.22E-03 | 2/202<br>0.9%   | 2/17784<br>0.0%   | <i>CYP1A1 AHRR</i>                                                                                        |
| 22414 | reproductive process                      | 1.35E-04 | 2.32E-03 | 22/202<br>10.8% | 808/17784<br>4.5% | <i>STAT5A OXTR CSF1 NOS2 WNT5A FOS ICAM1 APLN FOSL1 GJB2 DNMT3L FGF9 PLAUC3H12A WNT4 BIRC3</i>            |
| 7584  | response to nutrient                      | 1.37E-04 | 2.35E-03 | 9/202           | 169/17784         | <i>WNT6 CXCL10 UGT1A1 IL1B WNT7B WNT5A</i>                                                                |

|       |                                                   |          |          |                  |                     |                                                                                                                                                                                                                                                                                                                                                                                                                                                                                                                                                                                                                                                                                                            |
|-------|---------------------------------------------------|----------|----------|------------------|---------------------|------------------------------------------------------------------------------------------------------------------------------------------------------------------------------------------------------------------------------------------------------------------------------------------------------------------------------------------------------------------------------------------------------------------------------------------------------------------------------------------------------------------------------------------------------------------------------------------------------------------------------------------------------------------------------------------------------------|
|       |                                                   |          |          | 4.4%             | 0.9%                | <i>CYP11A1 AHRR SSTR2</i>                                                                                                                                                                                                                                                                                                                                                                                                                                                                                                                                                                                                                                                                                  |
| 3     | reproduction                                      | 1.42E-04 | 2.41E-03 | 22/202<br>10.8%  | 811/17784<br>4.5%   | <i>STAT5A OXTR CSF1 NOS2 WNT5A FOS ICAM1<br/>APLN FOSL1 GJB2 DNMT3L FGF9 PLAUG JJA10<br/>IL1B MAFF CYP11A1 SLIT1 AHRR TRIM36 WNT4<br/>BIRC3</i>                                                                                                                                                                                                                                                                                                                                                                                                                                                                                                                                                            |
| 45785 | positive regulation of cell<br>adhesion           | 1.43E-04 | 2.41E-03 | 6/202<br>2.9%    | 70/17784<br>0.3%    | <i>VAV3 CSF1 IL1B SAA1 SAA2 CX3CL1</i>                                                                                                                                                                                                                                                                                                                                                                                                                                                                                                                                                                                                                                                                     |
| 2250  | adaptive immune response                          | 1.55E-04 | 2.60E-03 | 6/202<br>2.9%    | 71/17784<br>0.3%    | <i>BCL3 TNFRSF11A ICAM1 RELB NFKB2 MBL2</i>                                                                                                                                                                                                                                                                                                                                                                                                                                                                                                                                                                                                                                                                |
| 51090 | regulation of transcription<br>factor activity    | 1.64E-04 | 2.72E-03 | 8/202<br>3.9%    | 136/17784<br>0.7%   | <i>NFKBIA IRAK2 IL1B WNT5A PROX1 TNFRSF11A<br/>NFKBID ICAM1</i>                                                                                                                                                                                                                                                                                                                                                                                                                                                                                                                                                                                                                                            |
| 90046 | regulation of transcription<br>regulator activity | 1.64E-04 | 2.72E-03 | 8/202<br>3.9%    | 136/17784<br>0.7%   | <i>NFKBIA IRAK2 IL1B WNT5A PROX1 TNFRSF11A<br/>NFKBID ICAM1</i>                                                                                                                                                                                                                                                                                                                                                                                                                                                                                                                                                                                                                                            |
| 9987  | cellular process                                  | 1.66E-04 | 2.74E-03 | 132/202<br>65.3% | 9368/17784<br>52.6% | <i>OXTR CSF1 SERPINE1 ETS1 ICAM1 NPPB FGF9<br/>ZC3H12A CYP11B1 PHLDA1 ICOSLG IER3 SLC34A3<br/>IGFBP1 MEF2C UNC13A SNRPN PRKCE WNT5A<br/>C8ORF4 RNASE2 TUBA4A ALDH3A1 SYPL1 ALPK3<br/>ATP6V0D2 SLC45A4 ITPR1 TGFA DAPPI<br/>TNFRSF11A ARL17B WNT6 IRAK2 GJA10 UBD<br/>NPTX1 PACSIN1 WNT4 STAT5A EGR1 KCNF1<br/>EGR2 PSAPL1 TIPARP FOXN4 FHDC1 LSM4<br/>NFKB2 FOSL1 NFKBIA RCAN1 CXCL10 GJB2<br/>CXCL11 BCL3 MAFF CYP11A1 LCN2 LHX4 ROBO3<br/>DYRK3 CXCL8 TAT TNFAIP2 TNFAIP3 ADRA1D<br/>CXCL1 CXCL3 AREG SLC2A6 CX3CL1 ROBO1<br/>RND1 DNMT3L ACOXL OLR1 PGM5 CCR6 CA8<br/>IKBKE MBL2 DUSP4 VAV3 HS3ST3B1 FGFBP1<br/>UGT1A1 SLC2A10 PCDHGA3 HUNK FOS PROX1<br/>SSTR2 DUSP6 SLC7A5 ALDH1A3 MRAS SNPH IL1B</i> |

|       |                                                                                              |          |          |                |                   |                                                                                                                                                                                                      |
|-------|----------------------------------------------------------------------------------------------|----------|----------|----------------|-------------------|------------------------------------------------------------------------------------------------------------------------------------------------------------------------------------------------------|
|       |                                                                                              |          |          |                |                   | <i>IRF1 CDH11 AHRR TLR7 MYH4 SOS1 CRYAB VAMP2 LAMA4 FAM129A GDPD1 ATP10B BARX2 STX11 RELB TIFA STX6 SLIT1 TDH SIPR3 CCL22 NDUFA5 NOS2 CCL20 GAD1 WNT7B SGPP2 DHRS9 SAA1 ATP13A4 SAA2 TRIM36 FSBP</i> |
| 51272 | positive regulation of cellular component movement                                           | 1.73E-04 | 2.82E-03 | 8/202<br>3.9%  | 137/17784<br>0.7% | <i>CXCL10 CSF1 SERPINE1 WNT5A PROX1 ETS1 ICAM1 HBEGF</i>                                                                                                                                             |
| 40017 | positive regulation of locomotion                                                            | 1.73E-04 | 2.82E-03 | 8/202<br>3.9%  | 137/17784<br>0.7% | <i>CXCL10 CXCL8 CSF1 SERPINE1 WNT5A PROX1 ICAM1 HBEGF</i>                                                                                                                                            |
| 33273 | response to vitamin                                                                          | 1.73E-04 | 2.82E-03 | 7/202<br>3.4%  | 103/17784<br>0.5% | <i>WNT6 CXCL10 IL1B WNT7B WNT5A CYP1A1 AHRR</i>                                                                                                                                                      |
| 22603 | regulation of anatomical structure morphogenesis                                             | 1.76E-04 | 2.84E-03 | 12/202<br>5.9% | 301/17784<br>1.6% | <i>NPPB WNT6 CXCL10 CSF1 PALMD IL1B SERPINE1 WNT5A SLIT1 PROX1 CX3CL1 ROBO1</i>                                                                                                                      |
| 42493 | response to drug                                                                             | 1.78E-04 | 2.85E-03 | 11/202<br>5.4% | 257/17784<br>1.4% | <i>FOSL1 ALDH1A3 OXTR UGT1A1 IL1B CYP1A1 AHRR FSBP FOS DUSP6 ABCG2</i>                                                                                                                               |
| 45935 | positive regulation of nucleobase, nucleoside, nucleotide and nucleic acid metabolic process | 1.81E-04 | 2.89E-03 | 19/202<br>9.4% | 656/17784<br>3.6% | <i>STAT5A EGR1 MEF2C EGR2 TESC WNT5A GRHL3 FOS PROX1 AREG ETS1 BARX2 FOSL1 NFKB1A IL1B IRF1 BCL3 TIFA WNT4</i>                                                                                       |
| 31960 | response to corticosteroid stimulus                                                          | 1.84E-04 | 2.93E-03 | 7/202<br>3.4%  | 104/17784<br>0.5% | <i>FOSL1 UGT1A1 IL1B TAT SERPINE1 SLIT1 FOS</i>                                                                                                                                                      |
| 33628 | regulation of cell adhesion mediated by integrin                                             | 2.23E-04 | 3.49E-03 | 3/202<br>1.4%  | 11/17784<br>0.0%  | <i>PLAU TESC SERPINE1</i>                                                                                                                                                                            |
| 9812  | flavonoid metabolic process                                                                  | 2.23E-04 | 3.49E-03 | 3/202<br>1.4%  | 11/17784<br>0.0%  | <i>UGT1A1 CYP1A1 AHRR</i>                                                                                                                                                                            |

|       |                                                   |          |          |                 |                   |                                                                                                                                               |
|-------|---------------------------------------------------|----------|----------|-----------------|-------------------|-----------------------------------------------------------------------------------------------------------------------------------------------|
| 48246 | macrophage chemotaxis                             | 2.23E-04 | 3.49E-03 | 3/202<br>1.4%   | 11/17784<br>0.0%  | <i>SAA1 SAA2 CX3CL1</i>                                                                                                                       |
| 51302 | regulation of cell division                       | 2.29E-04 | 3.54E-03 | 5/202<br>2.4%   | 49/17784<br>0.2%  | <i>BTC FGF9 IL1B TGFA CABLES1</i>                                                                                                             |
| 2274  | myeloid leukocyte activation                      | 2.29E-04 | 3.54E-03 | 5/202<br>2.4%   | 49/17784<br>0.2%  | <i>CXCL8 CSF1 UBD TLR7 RELB</i>                                                                                                               |
| 61061 | muscle development                                | 2.31E-04 | 3.57E-03 | 11/202<br>5.4%  | 265/17784<br>1.4% | <i>RCAN1 CXCL10 MEF2C MEF2B MRAS TIPARP PROX1 CRYAB BARX2 HBEGF WNT4</i>                                                                      |
| 42035 | regulation of cytokine biosynthetic process       | 2.42E-04 | 3.71E-03 | 6/202<br>2.9%   | 77/17784<br>0.4%  | <i>STAT5A IL1B IRF1 WNT5A BCL3 TLR7</i>                                                                                                       |
| 8284  | positive regulation of cell proliferation         | 2.50E-04 | 3.81E-03 | 15/202<br>7.4%  | 459/17784<br>2.5% | <i>STAT5A FGFBP1 CSF1 WNT5A TGFA ADRA1D PROX1 TNFRSF11A BTC FOSL1 CXCL10 FGF9 IL1B SIPR3 ICOSLG</i>                                           |
| 31325 | positive regulation of cellular metabolic process | 2.63E-04 | 3.99E-03 | 24/202<br>11.8% | 966/17784<br>5.4% | <i>STAT5A EGR1 MEF2C EGR2 CSF1 TESC WNT5A FAM129A SAMD4A GRHL3 FOS PROX1 AREG ETS1 BARX2 ICAM1 FOSL1 NFKB1A IL1B IRF1 BCL3 TIFA TLR7 WNT4</i> |
| 51049 | regulation of transport                           | 2.68E-04 | 4.05E-03 | 16/202<br>7.9%  | 514/17784<br>2.8% | <i>OXTR NOS2 LGI3 SERPINE1 WNT5A TNFRSF11A BTC NFKB1A IL1B BCL3 SAA1 SAA2 TLR7 CRYAB PACSIN1 MBL2</i>                                         |
| 42445 | hormone metabolic process                         | 2.75E-04 | 4.13E-03 | 7/202<br>3.4%   | 111/17784<br>0.6% | <i>ALDH1A3 DHRS9 UGT1A1 CYP1A1 CYP1B1 AHRR WNT4</i>                                                                                           |
| 50920 | regulation of chemotaxis                          | 2.77E-04 | 4.13E-03 | 5/202<br>2.4%   | 51/17784<br>0.2%  | <i>CXCL10 CXCL8 SERPINE1 WNT5A ROBO1</i>                                                                                                      |
| 10647 | positive regulation of cell                       | 2.78E-04 | 4.13E-03 | 14/202          | 413/17784         | <i>OXTR FGFBP1 CSF1 WNT5A TGFA TNFRSF11A</i>                                                                                                  |



|       |                                                    |          |          |                |                   |                                                                                                                                    |
|-------|----------------------------------------------------|----------|----------|----------------|-------------------|------------------------------------------------------------------------------------------------------------------------------------|
|       | communication                                      |          |          | 6.9%           | 2.3%              | <i>FGF9 IL1B UBD IKBKE LMCD1 TMEM9B HBEGF WNT4</i>                                                                                 |
| 51050 | positive regulation of transport                   | 2.81E-04 | 4.15E-03 | 11/202<br>5.4% | 271/17784<br>1.5% | <i>BTC NFKBIA OXTR IL1B SERPINE1 WNT5A SAA1 SAA2 TLR7 TNFRSF11A MBL2</i>                                                           |
| 165   | MAPKKK cascade                                     | 2.82E-04 | 4.15E-03 | 9/202<br>4.4%  | 186/17784<br>1.0% | <i>DUSP4 OXTR SPRED1 IL1B WNT5A TGFA CRYAB DUSP6 RASGRP3</i>                                                                       |
| 45939 | negative regulation of steroid metabolic process   | 2.95E-04 | 4.29E-03 | 3/202<br>1.4%  | 12/17784<br>0.0%  | <i>UGT1A1 PROX1 WNT4</i>                                                                                                           |
| 8045  | motor axon guidance                                | 2.95E-04 | 4.29E-03 | 3/202<br>1.4%  | 12/17784<br>0.0%  | <i>EGR2 SLIT1 LHX4</i>                                                                                                             |
| 7204  | elevation of cytosolic calcium ion concentration   | 3.07E-04 | 4.46E-03 | 7/202<br>3.4%  | 113/17784<br>0.6% | <i>OXTR IL1B SAA1 ITPR1 SAA2 SIPR3 CCR6</i>                                                                                        |
| 10627 | regulation of intracellular protein kinase cascade | 3.35E-04 | 4.84E-03 | 12/202<br>5.9% | 323/17784<br>1.8% | <i>FGF9 IL1B UBD WNT5A TIFA TNFAIP3 TNFRSF11A IKBKE NFKBID TMEM9B DUSP6 HBEGF</i>                                                  |
| 1525  | angiogenesis                                       | 3.50E-04 | 5.00E-03 | 8/202<br>3.9%  | 152/17784<br>0.8% | <i>VAV3 CXCL8 FGF9 PLAUI ZC3H12A TNFAIP2 CX3CL1 ROBO1</i>                                                                          |
| 60443 | mammary morphogenesis gland                        | 3.51E-04 | 5.00E-03 | 4/202<br>1.9%  | 30/17784<br>0.1%  | <i>CSF1 WNT5A ROBO1 WNT4</i>                                                                                                       |
| 9888  | tissue development                                 | 3.60E-04 | 5.10E-03 | 20/202<br>9.9% | 750/17784<br>4.2% | <i>STAT5A IGFBP1 CSF1 TIPARP WNT7B SERPINE1 WNT5A GRHL3 PROX1 IKZF3 BARX2 ROBO1 RGMA RCAN1 ALDH1A3 KRT17 DHRS9 FGF9 PLAUI WNT4</i> |
| 9698  | phenylpropanoid metabolic process                  | 3.80E-04 | 5.17E-03 | 3/202<br>1.4%  | 13/17784<br>0.0%  | <i>UGT1A1 CYP1A1 AHRR</i>                                                                                                          |

|       |                                                                   |          |          |               |                  |                                         |
|-------|-------------------------------------------------------------------|----------|----------|---------------|------------------|-----------------------------------------|
| 40036 | regulation of fibroblast growth factor receptor signaling pathway | 3.80E-04 | 5.17E-03 | 3/202<br>1.4% | 13/17784<br>0.0% | <i>FGFBP1 WNT5A WNT4</i>                |
| 48596 | embryonic camera-type eye morphogenesis                           | 3.80E-04 | 5.17E-03 | 3/202<br>1.4% | 13/17784<br>0.0% | <i>ALDH1A3 WNT5A PROX1</i>              |
| 70099 | regulation of chemokine-mediated signaling pathway                | 3.82E-04 | 5.17E-03 | 2/202<br>0.9% | 3/17784<br>0.0%  | <i>SLIT1 ROBO1</i>                      |
| 70100 | negative regulation of chemokine-mediated signaling pathway       | 3.82E-04 | 5.17E-03 | 2/202<br>0.9% | 3/17784<br>0.0%  | <i>SLIT1 ROBO1</i>                      |
| 42178 | xenobiotic catabolic process                                      | 3.82E-04 | 5.17E-03 | 2/202<br>0.9% | 3/17784<br>0.0%  | <i>CYP1A1 AHRR</i>                      |
| 10041 | response to iron(III) ion                                         | 3.82E-04 | 5.17E-03 | 2/202<br>0.9% | 3/17784<br>0.0%  | <i>CYP1A1 AHRR</i>                      |
| 2072  | optic cup morphogenesis involved in camera-type eye development   | 3.82E-04 | 5.17E-03 | 2/202<br>0.9% | 3/17784<br>0.0%  | <i>ALDH1A3 WNT5A</i>                    |
| 18894 | dibenzo-p-dioxin metabolic process                                | 3.82E-04 | 5.17E-03 | 2/202<br>0.9% | 3/17784<br>0.0%  | <i>CYP1A1 AHRR</i>                      |
| 35385 | Roundabout signaling pathway                                      | 3.82E-04 | 5.17E-03 | 2/202<br>0.9% | 3/17784<br>0.0%  | <i>SLIT1 ROBO1</i>                      |
| 51092 | positive regulation of NF-kappaB transcription factor activity    | 3.95E-04 | 5.29E-03 | 5/202<br>2.4% | 55/17784<br>0.3% | <i>IRAK2 IL1B WNT5A TNFRSF11A ICAMI</i> |
| 48565 | digestive tract development                                       | 3.95E-04 | 5.29E-03 | 5/202         | 55/17784         | <i>OXTR FGF9 WNT5A CYP1A1 AHRR</i>      |

|       |                                               |          |          |                 |                    |      |      |                                                                                                                                                                        |
|-------|-----------------------------------------------|----------|----------|-----------------|--------------------|------|------|------------------------------------------------------------------------------------------------------------------------------------------------------------------------|
|       |                                               |          |          |                 |                    | 2.4% | 0.3% |                                                                                                                                                                        |
| 2687  | positive regulation of leukocyte migration    | 4.00E-04 | 5.33E-03 | 4/202<br>1.9%   | 31/17784<br>0.1%   |      |      | <i>CXCL10 SERPINE1 WNT5A ICAM1</i>                                                                                                                                     |
| 10035 | response to inorganic substance               | 4.17E-04 | 5.54E-03 | 10/202<br>4.9%  | 239/17784<br>1.3%  |      |      | <i>SLC34A3 FOSL1 TAT SERPINE1 WNT5A CYP1A1 OLR1 AHRR FOS CRYAB</i>                                                                                                     |
| 35468 | positive regulation of signaling pathway      | 4.20E-04 | 5.54E-03 | 13/202<br>6.4%  | 380/17784<br>2.1%  |      |      | <i>FGFBP1 CSF1 WNT5A TGFA TNFRSF11A FGF9 IL1B UBD IKBKE LMCD1 TMEM9B HBEGF WNT4</i>                                                                                    |
| 42110 | T cell activation                             | 4.21E-04 | 5.54E-03 | 7/202<br>3.4%   | 119/17784<br>0.6%  |      |      | <i>STAT5A EGR1 IRF1 BCL3 ICOSLG ICAM1 RELB</i>                                                                                                                         |
| 65009 | regulation of molecular function              | 4.37E-04 | 5.72E-03 | 25/202<br>12.3% | 1062/17784<br>5.9% |      |      | <i>CSF1 SERPINE1 TGFA TBC1D3F TNFRSF11A GNAI1 TBC1D3G ICAM1 ROBO1 RASGRP3 SPRED1 PLAU IRAK2 SIPR3 VAV3 WNT5A PROX1 SSTR2 DUSP6 NFKBIA RCAN1 IL1B BCL3 CRYAB NFKBID</i> |
| 43010 | camera-type development eye                   | 4.43E-04 | 5.78E-03 | 7/202<br>3.4%   | 120/17784<br>0.6%  |      |      | <i>ALDH1A3 WNT7B WNT5A CYP1A1 AHRR PROX1 CRYAB</i>                                                                                                                     |
| 45765 | regulation of angiogenesis                    | 4.69E-04 | 6.10E-03 | 6/202<br>2.9%   | 87/17784<br>0.4%   |      |      | <i>NPPB CXCL10 IL1B SERPINE1 WNT5A CX3CL1</i>                                                                                                                          |
| 2286  | T cell activation involved in immune response | 4.79E-04 | 6.17E-03 | 3/202<br>1.4%   | 14/17784<br>0.0%   |      |      | <i>BCL3 ICAM1 RELB</i>                                                                                                                                                 |
| 51098 | regulation of binding                         | 4.79E-04 | 6.17E-03 | 9/202<br>4.4%   | 200/17784<br>1.1%  |      |      | <i>NFKBIA IRAK2 IL1B WNT5A BCL3 PROX1 TNFRSF11A NFKBID ICAM1</i>                                                                                                       |
| 7565  | female pregnancy                              | 4.89E-04 | 6.27E-03 | 7/202<br>3.4%   | 122/17784<br>0.6%  |      |      | <i>STAT5A FOSL1 OXTR PLAU IL1B FOS WNT4</i>                                                                                                                            |

|       |                                                                      |          |          |                |                   |                                                                                               |
|-------|----------------------------------------------------------------------|----------|----------|----------------|-------------------|-----------------------------------------------------------------------------------------------|
| 31667 | response to nutrient levels                                          | 4.91E-04 | 6.27E-03 | 10/202<br>4.9% | 244/17784<br>1.3% | <i>SLC34A3 WNT6 CXCL10 UGT1A1 IL1B WNT7B WNT5A CYP1A1 AHRR SSTR2</i>                          |
| 45944 | positive regulation of transcription from RNA polymerase II promoter | 5.11E-04 | 6.47E-03 | 13/202<br>6.4% | 388/17784<br>2.1% | <i>STAT5A EGR1 MEF2C EGR2 FOS ETS1 BARX2 FOSL1 NFKBIA IL1B IRF1 BCL3 TIFA</i>                 |
| 51480 | cytosolic calcium ion homeostasis                                    | 5.14E-04 | 6.48E-03 | 7/202<br>3.4%  | 123/17784<br>0.6% | <i>OXTR IL1B SAA1 ITPR1 SAA2 SIPR3 CCR6</i>                                                   |
| 9719  | response to endogenous stimulus                                      | 5.29E-04 | 6.64E-03 | 15/202<br>7.4% | 493/17784<br>2.7% | <i>STAT5A IGFBP1 EGR1 OXTR EGR2 UGT1A1 TAT SERPINE1 WNT5A FOS FOSL1 IL1B SLIT1 CRYAB WNT4</i> |
| 43065 | positive regulation of apoptosis                                     | 5.47E-04 | 6.82E-03 | 14/202<br>6.9% | 442/17784<br>2.4% | <i>VAV3 PRKCE TNFRSF9 ETS1 DUSP6 FOSL1 ALDH1A3 IL1B UBD BCL3 SOS1 IKBKE PHLDA1 NFKBID</i>     |
| 6720  | isoprenoid metabolic process                                         | 5.48E-04 | 6.82E-03 | 5/202<br>2.4%  | 59/17784<br>0.3%  | <i>ALDH1A3 DHRS9 UGT1A1 CYP1A1 AHRR</i>                                                       |
| 2088  | lens development in camera-type eye                                  | 5.74E-04 | 7.09E-03 | 4/202<br>1.9%  | 34/17784<br>0.1%  | <i>WNT7B WNT5A PROX1 CRYAB</i>                                                                |
| 43068 | positive regulation of programmed cell death                         | 5.84E-04 | 7.19E-03 | 14/202<br>6.9% | 445/17784<br>2.5% | <i>VAV3 PRKCE TNFRSF9 ETS1 DUSP6 FOSL1 ALDH1A3 IL1B UBD BCL3 SOS1 IKBKE PHLDA1 NFKBID</i>     |
| 46632 | alpha-beta T cell differentiation                                    | 5.94E-04 | 7.22E-03 | 3/202<br>1.4%  | 15/17784<br>0.0%  | <i>IRF1 BCL3 RELB</i>                                                                         |
| 2224  | toll-like receptor signaling pathway                                 | 5.94E-04 | 7.22E-03 | 3/202<br>1.4%  | 15/17784<br>0.0%  | <i>NFKBIA IRAK2 TLR7</i>                                                                      |
| 60444 | branching involved in                                                | 5.94E-04 | 7.22E-03 | 3/202          | 15/17784          | <i>CSF1 WNT5A WNT4</i>                                                                        |

|       |                                                     |          |          |                |                   |                                                                                                  |
|-------|-----------------------------------------------------|----------|----------|----------------|-------------------|--------------------------------------------------------------------------------------------------|
|       | mammary gland duct morphogenesis                    |          |          | 1.4%           | 0.0%              |                                                                                                  |
| 45595 | regulation of cell differentiation                  | 5.97E-04 | 7.22E-03 | 16/202<br>7.9% | 553/17784<br>3.1% | <i>STAT5A CD83 CSF1 TESC WNT7B WNT5A PROX1 ETS1 ROBO1 BTC NFKBIA FGF9 MAFF SLIT1 NFKBID WNT4</i> |
| 45893 | positive regulation of transcription, DNA-dependent | 6.11E-04 | 7.37E-03 | 15/202<br>7.4% | 500/17784<br>2.8% | <i>STAT5A EGR1 MEF2C EGR2 TESC FOS PROX1 ETS1 BARX2 FOSL1 NFKBIA IL1B IRF1 BCL3 TIFA</i>         |
| 43122 | regulation of I-kappaB kinase/NF-kappaB cascade     | 6.22E-04 | 7.47E-03 | 7/202<br>3.4%  | 127/17784<br>0.7% | <i>IL1B UBD TNFAIP3 TNFRSF11A IKBKE NFKBID TMEM9B</i>                                            |
| 10942 | positive regulation of cell death                   | 6.38E-04 | 7.60E-03 | 14/202<br>6.9% | 449/17784<br>2.5% | <i>VAV3 PRKCE TNFRSF9 ETS1 DUSP6 FOSL1 ALDH1A3 IL1B UBD BCL3 SOS1 IKBKE PHLDA1 NFKBID</i>        |
| 30335 | positive regulation of cell migration               | 6.52E-04 | 7.74E-03 | 7/202<br>3.4%  | 128/17784<br>0.7% | <i>CXCL10 CSF1 SERPINE1 WNT5A PROX1 ICAM1 HBEGF</i>                                              |
| 30217 | T cell differentiation                              | 6.89E-04 | 8.10E-03 | 5/202<br>2.4%  | 62/17784<br>0.3%  | <i>STAT5A EGR1 IRF1 BCL3 RELB</i>                                                                |
| 7249  | I-kappaB kinase/NF-kappaB cascade                   | 6.89E-04 | 8.10E-03 | 5/202<br>2.4%  | 62/17784<br>0.3%  | <i>NFKBIA IRAK2 BCL3 TIFA TLR7</i>                                                               |
| 51254 | positive regulation of RNA metabolic process        | 6.91E-04 | 8.10E-03 | 15/202<br>7.4% | 506/17784<br>2.8% | <i>STAT5A EGR1 MEF2C EGR2 TESC FOS PROX1 ETS1 BARX2 FOSL1 NFKBIA IL1B IRF1 BCL3 TIFA</i>         |
| 1889  | liver development                                   | 7.41E-04 | 8.65E-03 | 5/202<br>2.4%  | 63/17784<br>0.3%  | <i>UGT1A1 CYP1A1 AHRR PROX1 WNT4</i>                                                             |
| 42093 | T-helper cell differentiation                       | 7.59E-04 | 8.66E-03 | 2/202<br>0.9%  | 4/17784<br>0.0%   | <i>BCL3 RELB</i>                                                                                 |

|       |                                                                             |          |          |                 |                     |                                                                                                                                                                                                                                                                                                                                           |
|-------|-----------------------------------------------------------------------------|----------|----------|-----------------|---------------------|-------------------------------------------------------------------------------------------------------------------------------------------------------------------------------------------------------------------------------------------------------------------------------------------------------------------------------------------|
| 9624  | response to nematode                                                        | 7.59E-04 | 8.66E-03 | 2/202<br>0.9%   | 4/17784<br>0.0%     | <i>CYP11A1 AHRR</i>                                                                                                                                                                                                                                                                                                                       |
| 22028 | tangential migration from the subventricular zone to the olfactory bulb     | 7.59E-04 | 8.66E-03 | 2/202<br>0.9%   | 4/17784<br>0.0%     | <i>SLIT1 ROBO1</i>                                                                                                                                                                                                                                                                                                                        |
| 2294  | CD4-positive, alpha-beta T cell differentiation involved in immune response | 7.59E-04 | 8.66E-03 | 2/202<br>0.9%   | 4/17784<br>0.0%     | <i>BCL3 RELB</i>                                                                                                                                                                                                                                                                                                                          |
| 60763 | mammary duct terminal end bud growth                                        | 7.59E-04 | 8.66E-03 | 2/202<br>0.9%   | 4/17784<br>0.0%     | <i>CSF1 ROBO1</i>                                                                                                                                                                                                                                                                                                                         |
| 60341 | regulation of cellular localization                                         | 7.75E-04 | 8.78E-03 | 11/202<br>5.4%  | 306/17784<br>1.7%   | <i>NFKBIA OXTR NOS2 IL1B LGI3 WNT5A BCL3 SAA1 SAA2 TLR7 CRYAB</i>                                                                                                                                                                                                                                                                         |
| 51179 | localization                                                                | 7.76E-04 | 8.78E-03 | 52/202<br>25.7% | 2985/17784<br>16.7% | <i>OXTR CXCL8 RASEF CXCL3 ETS1 SLC2A6 CX3CL1 ICAM1 ROBO1 NPPB RAB43 FGF9 DUOX2 MBL2 SLC34A3 VAV3 UNC13A SLC2A10 WNT5A SLC7A5 SNPH IL1B MYH4 ATP6V0D2 SCN4B VAMP2 ABCG2 SLC45A4 ITPR1 ATP10B TNFRSF11A STX11 ARL17B APOF STX6 SLIT1 NPTX1 PACSIN1 WNT4 STAT5A KCNF1 CCL22 NDUFA5 NFKBIA CXCL10 GJB2 BCL3 SAA1 LCN2 ATP13A4 SAA2 TRIM36</i> |
| 45639 | positive regulation of myeloid cell differentiation                         | 7.96E-04 | 8.92E-03 | 4/202<br>1.9%   | 37/17784<br>0.2%    | <i>STAT5A CSF1 TESC ETS1</i>                                                                                                                                                                                                                                                                                                              |
| 55123 | digestive system development                                                | 7.97E-04 | 8.92E-03 | 5/202<br>2.4%   | 64/17784<br>0.3%    | <i>OXTR FGF9 WNT5A CYP11A1 AHRR</i>                                                                                                                                                                                                                                                                                                       |
| 61008 | hepaticobiliary system development                                          | 7.97E-04 | 8.92E-03 | 5/202<br>2.4%   | 64/17784<br>0.3%    | <i>UGT1A1 CYP11A1 AHRR PROX1 WNT4</i>                                                                                                                                                                                                                                                                                                     |

|       |                                                      |          |          |                |                   |                                                                     |
|-------|------------------------------------------------------|----------|----------|----------------|-------------------|---------------------------------------------------------------------|
| 19216 | regulation of lipid metabolic process                | 8.19E-04 | 9.13E-03 | 7/202<br>3.4%  | 133/17784<br>0.7% | <i>STAT5A VAV3 SERPINA3 UGT1A1 IL1B PROX1 WNT4</i>                  |
| 30334 | regulation of cell migration                         | 8.32E-04 | 9.24E-03 | 9/202<br>4.4%  | 216/17784<br>1.2% | <i>CXCL10 CSF1 PLA2G2B LAMA4 SERPINE1 WNT5A PROX1 ICAM1 HBEGF</i>   |
| 35467 | negative regulation of signaling pathway             | 8.50E-04 | 9.41E-03 | 10/202<br>4.9% | 262/17784<br>1.4% | <i>NFKBIA FGF9 IL1B WNT5A SLIT1 TNFAIP3 NFKBID DUSP6 ROBO1 WNT4</i> |
| 31076 | embryonic camera-type eye development                | 8.73E-04 | 9.56E-03 | 3/202<br>1.4%  | 17/17784<br>0.0%  | <i>ALDH1A3 WNT5A PROX1</i>                                          |
| 60324 | face development                                     | 8.73E-04 | 9.56E-03 | 3/202<br>1.4%  | 17/17784<br>0.0%  | <i>ALDH1A3 TIPARP WNT5A</i>                                         |
| 48048 | embryonic morphogenesis eye                          | 8.73E-04 | 9.56E-03 | 3/202<br>1.4%  | 17/17784<br>0.0%  | <i>ALDH1A3 WNT5A PROX1</i>                                          |
| 2573  | myeloid leukocyte differentiation                    | 8.81E-04 | 9.62E-03 | 4/202<br>1.9%  | 38/17784<br>0.2%  | <i>CSF1 UBD TNFRSF11A RELB</i>                                      |
| 7346  | regulation of mitotic cell cycle                     | 8.88E-04 | 9.66E-03 | 8/202<br>3.9%  | 175/17784<br>0.9% | <i>BTC STAT5A IL1B UBD CYP1A1 TGFA AHRR PROX1</i>                   |
| 51047 | positive regulation of secretion                     | 8.94E-04 | 9.68E-03 | 7/202<br>3.4%  | 135/17784<br>0.7% | <i>BTC OXTR IL1B WNT5A SAA1 SAA2 TNFRSF11A</i>                      |
| 6800  | oxygen and reactive oxygen species metabolic process | 9.17E-04 | 9.86E-03 | 5/202<br>2.4%  | 66/17784<br>0.3%  | <i>NOS2 TIFA CYP1A1 AHRR CRYAB</i>                                  |
| 7517  | muscle organ development                             | 9.17E-04 | 9.86E-03 | 9/202<br>4.4%  | 219/17784<br>1.2% | <i>RCAN1 CXCL10 MEF2C MEF2B MRAS TIPARP PROX1 CRYAB HBEGF</i>       |
| 2263  | cell activation involved in immune response          | 9.74E-04 | 1.04E-02 | 4/202<br>1.9%  | 39/17784<br>0.2%  | <i>BCL3 TLR7 ICAM1 RELB</i>                                         |

|       |                                                  |          |          |               |                   |                                                                |
|-------|--------------------------------------------------|----------|----------|---------------|-------------------|----------------------------------------------------------------|
| 2366  | leukocyte activation involved in immune response | 9.74E-04 | 1.04E-02 | 4/202<br>1.9% | 39/17784<br>0.2%  | <i>BCL3 TLR7 ICAMI RELB</i>                                    |
| 2221  | pattern recognition receptor signaling pathway   | 1.04E-03 | 1.11E-02 | 3/202<br>1.4% | 18/17784<br>0.1%  | <i>NFKBIA IRAK2 TLR7</i>                                       |
| 10564 | regulation of cell cycle process                 | 1.06E-03 | 1.12E-02 | 7/202<br>3.4% | 139/17784<br>0.7% | <i>BTC IL1B UBD CYP1A1 TGFA AHRR PROX1</i>                     |
| 45833 | negative regulation of lipid metabolic process   | 1.07E-03 | 1.12E-02 | 4/202<br>1.9% | 40/17784<br>0.2%  | <i>UGT1A1 IL1B PROX1 WNT4</i>                                  |
| 51781 | positive regulation of cell division             | 1.07E-03 | 1.12E-02 | 4/202<br>1.9% | 40/17784<br>0.2%  | <i>BTC FGF9 IL1B TGFA</i>                                      |
| 2685  | regulation of leukocyte migration                | 1.07E-03 | 1.12E-02 | 4/202<br>1.9% | 40/17784<br>0.2%  | <i>CXCL10 SERPINE1 WNT5A ICAMI</i>                             |
| 48545 | response to steroid hormone stimulus             | 1.11E-03 | 1.16E-02 | 9/202<br>4.4% | 225/17784<br>1.2% | <i>FOSL1 OXTR UGT1A1 IL1B TAT SERPINE1 SLIT1<br/>FOS CRYAB</i> |
| 33189 | response to vitamin A                            | 1.12E-03 | 1.16E-02 | 5/202<br>2.4% | 69/17784<br>0.3%  | <i>WNT6 WNT7B WNT5A CYP1A1 AHRR</i>                            |
| 50795 | regulation of behavior                           | 1.12E-03 | 1.16E-02 | 5/202<br>2.4% | 69/17784<br>0.3%  | <i>CXCL10 CXCL8 SERPINE1 WNT5A ROBO1</i>                       |
| 16331 | morphogenesis of embryonic epithelium            | 1.12E-03 | 1.16E-02 | 5/202<br>2.4% | 69/17784<br>0.3%  | <i>ALDH1A3 WNT7B WNT5A RGMA WNT4</i>                           |
| 72001 | renal system development                         | 1.14E-03 | 1.18E-02 | 6/202<br>2.9% | 103/17784<br>0.5% | <i>ALDH1A3 TIPARP WNT7B WNT5A PROX1 WNT4</i>                   |
| 21510 | spinal cord development                          | 1.18E-03 | 1.21E-02 | 4/202<br>1.9% | 41/17784<br>0.2%  | <i>SLIT1 PROX1 LHX4 ROBO1</i>                                  |



|       |                                                                                                                           |          |          |                |                   |                                                                                     |
|-------|---------------------------------------------------------------------------------------------------------------------------|----------|----------|----------------|-------------------|-------------------------------------------------------------------------------------|
| 50921 | positive regulation of chemotaxis                                                                                         | 1.18E-03 | 1.21E-02 | 4/202<br>1.9%  | 41/17784<br>0.2%  | <i>CXCL10 CXCL8 SERPINE1 WNT5A</i>                                                  |
| 2460  | adaptive immune response based on somatic recombination of immune receptors built from immunoglobulin superfamily domains | 1.20E-03 | 1.21E-02 | 5/202<br>2.4%  | 70/17784<br>0.3%  | <i>BCL3 ICAM1 RELB NFKB2 MBL2</i>                                                   |
| 19221 | cytokine-mediated signaling pathway                                                                                       | 1.20E-03 | 1.21E-02 | 5/202<br>2.4%  | 70/17784<br>0.3%  | <i>STAT5A IRAK2 IL1B TNFRSF11A CX3CL1</i>                                           |
| 1655  | urogenital system development                                                                                             | 1.20E-03 | 1.21E-02 | 7/202<br>3.4%  | 142/17784<br>0.7% | <i>STAT5A ALDH1A3 TIPARP WNT7B WNT5A PROX1 WNT4</i>                                 |
| 44092 | negative regulation of molecular function                                                                                 | 1.21E-03 | 1.21E-02 | 12/202<br>5.9% | 374/17784<br>2.1% | <i>NFKBIA SPRED1 IRAK2 IL1B SERPINE1 S1PR3 PROX1 SSTR2 CRYAB NFKBID DUSP6 GNAI1</i> |
| 46631 | alpha-beta T cell activation                                                                                              | 1.22E-03 | 1.21E-02 | 3/202<br>1.4%  | 19/17784<br>0.1%  | <i>IRF1 BCL3 RELB</i>                                                               |
| 71300 | cellular response to retinoic acid                                                                                        | 1.22E-03 | 1.21E-02 | 3/202<br>1.4%  | 19/17784<br>0.1%  | <i>WNT6 WNT7B WNT5A</i>                                                             |
| 2285  | lymphocyte activation involved in immune response                                                                         | 1.22E-03 | 1.21E-02 | 3/202<br>1.4%  | 19/17784<br>0.1%  | <i>BCL3 ICAM1 RELB</i>                                                              |
| 7090  | regulation of S phase of mitotic cell cycle                                                                               | 1.22E-03 | 1.21E-02 | 3/202<br>1.4%  | 19/17784<br>0.1%  | <i>CYP11A1 AHRR PROX1</i>                                                           |
| 32370 | positive regulation of lipid transport                                                                                    | 1.22E-03 | 1.21E-02 | 3/202<br>1.4%  | 19/17784<br>0.1%  | <i>NFKBIA IL1B TNFRSF11A</i>                                                        |
| 8150  | biological_process                                                                                                        | 1.24E-03 | 1.21E-02 | 179/202        | 14300/17784       | <i>PAGE4 OXTR CD83 CSF1 SERPINE1 RASEF</i>                                          |

|      |                                                             |          |          |               |                 |                                                                                                                                                                                                                                                                                                                                                                                                                                                                                                                                                                                                                                                                                                                                                                                                                                                                                                                                                                                                                                                                                                                                                                                                                                                       |
|------|-------------------------------------------------------------|----------|----------|---------------|-----------------|-------------------------------------------------------------------------------------------------------------------------------------------------------------------------------------------------------------------------------------------------------------------------------------------------------------------------------------------------------------------------------------------------------------------------------------------------------------------------------------------------------------------------------------------------------------------------------------------------------------------------------------------------------------------------------------------------------------------------------------------------------------------------------------------------------------------------------------------------------------------------------------------------------------------------------------------------------------------------------------------------------------------------------------------------------------------------------------------------------------------------------------------------------------------------------------------------------------------------------------------------------|
|      |                                                             |          |          | 88.6%         | 80.4%           | <i>TBC1D3F IKZF3 ETS1 ACTG2 TBC1D3G ICAM1<br/> NPPB RAB43 CAPN6 FGF9 PLAU ZC3H12A<br/> DUOX2 CYP1B1 ZNF169 PHLDA1 ICOSLG IER3<br/> SLC34A3 IGFBP1 MEF2C UNC13A MEF2B SNRPN<br/> TPRA1 ARL14 PRKCE WNT5A C8ORF4 GPR37L1<br/> RNASE2 TUBA4A BTC ALDH3A1 SYPL1 ALPK3<br/> ATP6V0D2 ABCG2 SLC45A4 NXPH3 ITPR1 TGFA<br/> DAPP1 TNFRSF11A RASGRP3 ARL17B WNT6<br/> IRAK2 GJA10 UBD APOF NPTX1 PACSIN1 WNT4<br/> STAT5A EGR1 KCNF1 EGR2 PSAPL1 TIPARP<br/> TNFRSF9 FOXP4 FHDC1 LSM4 NFkB2 FOSL1<br/> ABTB2 NFkBIA RCAN1 CXCL10 GJB2 CXCL11<br/> BCL3 MAFF CYP1A1 LCN2 LHX4 NFkBID<br/> TMEM9B SERPINA3 ROBO3 DYRK3 CXCL8 TAT<br/> TNFAIP2 TNFAIP3 ADRA1D CXCL1 CXCL3 AREG<br/> CXCL2 SLC2A6 CX3CL1 ROBO1 RND1 MMP25<br/> DNMT3L ACOXL SPRED1 OLR1 PGM5 CCR6 CA8<br/> IKBKE LMCD1 MBL2 DUSP4 VAV3 HS3ST3B1<br/> FGFBP1 SERPINB2 UGT1A1 SLC2A10 PCDHGA3<br/> TESC HUNK FOS PROX1 SSTR2 DUSP6 RGMA<br/> SLC7A5 ALDH1A3 MRAS SNPH IL1B IRF1 CDH11<br/> AHRR TLR7 NCOA7 MYH4 SOS1 CRYAB SCN4B<br/> VAMP2 HBEGF BIRC3 LAMA4 RGS16 FAM129A<br/> GDPD1 ATP10B BARX2 GNAI1 STX11 RELB<br/> PALMD TIFA STX6 SLIT1 TDH S1PR3 CCL22<br/> NDUFA5 NOS2 CCL20 GAD1 WNT7B LGI3<br/> SAMD4A CABLES1 GRHL3 SGPP2 APLN KRT17<br/> DHRS9 FABP6 SAA1 ATP13A4 SAA2 TRIM36 FSBP</i> |
| 2287 | alpha-beta T cell activation<br>involved in immune response | 1.26E-03 | 1.21E-02 | 2/202<br>0.9% | 5/17784<br>0.0% | <i>BCL3 RELB</i>                                                                                                                                                                                                                                                                                                                                                                                                                                                                                                                                                                                                                                                                                                                                                                                                                                                                                                                                                                                                                                                                                                                                                                                                                                      |
| 2292 | T cell differentiation involved<br>in immune response       | 1.26E-03 | 1.21E-02 | 2/202<br>0.9% | 5/17784<br>0.0% | <i>BCL3 RELB</i>                                                                                                                                                                                                                                                                                                                                                                                                                                                                                                                                                                                                                                                                                                                                                                                                                                                                                                                                                                                                                                                                                                                                                                                                                                      |

|       |                                                               |          |          |                |                   |                                                                           |
|-------|---------------------------------------------------------------|----------|----------|----------------|-------------------|---------------------------------------------------------------------------|
| 2293  | alpha-beta T cell differentiation involved in immune response | 1.26E-03 | 1.21E-02 | 2/202<br>0.9%  | 5/17784<br>0.0%   | <i>BCL3 RELB</i>                                                          |
| 2467  | germinal center formation                                     | 1.26E-03 | 1.21E-02 | 2/202<br>0.9%  | 5/17784<br>0.0%   | <i>BCL3 NFKB2</i>                                                         |
| 16199 | axon midline choice point recognition                         | 1.26E-03 | 1.21E-02 | 2/202<br>0.9%  | 5/17784<br>0.0%   | <i>ROBO3 ROBO1</i>                                                        |
| 9967  | positive regulation of signal transduction                    | 1.26E-03 | 1.21E-02 | 10/202<br>4.9% | 276/17784<br>1.5% | <i>CSF1 FGF9 IL1B UBD WNT5A TNFRSF11A IKBKE LMCD1 TMEM9B HBEGF</i>        |
| 23036 | initiation of signal transduction                             | 1.28E-03 | 1.22E-02 | 5/202<br>2.4%  | 71/17784<br>0.3%  | <i>STAT5A IRAK2 IL1B TNFRSF11A CX3CL1</i>                                 |
| 23038 | signal initiation by diffusible mediator                      | 1.28E-03 | 1.22E-02 | 5/202<br>2.4%  | 71/17784<br>0.3%  | <i>STAT5A IRAK2 IL1B TNFRSF11A CX3CL1</i>                                 |
| 23049 | signal initiation by protein/peptide mediator                 | 1.28E-03 | 1.22E-02 | 5/202<br>2.4%  | 71/17784<br>0.3%  | <i>STAT5A IRAK2 IL1B TNFRSF11A CX3CL1</i>                                 |
| 10648 | negative regulation of cell communication                     | 1.36E-03 | 1.29E-02 | 11/202<br>5.4% | 328/17784<br>1.8% | <i>NFKBIA FGF9 IL1B RGS16 WNT5A SLIT1 TNFAIP3 NFKBID DUSP6 ROBO1 WNT4</i> |
| 45766 | positive regulation of angiogenesis                           | 1.41E-03 | 1.33E-02 | 4/202<br>1.9%  | 43/17784<br>0.2%  | <i>IL1B SERPINE1 WNT5A CX3CL1</i>                                         |
| 2699  | positive regulation of immune effector process                | 1.41E-03 | 1.33E-02 | 4/202<br>1.9%  | 43/17784<br>0.2%  | <i>STAT5A NOS2 IL1B WNT5A</i>                                             |
| 51223 | regulation of protein transport                               | 1.41E-03 | 1.33E-02 | 7/202<br>3.4%  | 146/17784<br>0.8% | <i>NFKBIA IL1B WNT5A BCL3 SAA1 SAA2 TLR7</i>                              |
| 71299 | cellular response to vitamin A                                | 1.43E-03 | 1.34E-02 | 3/202          | 20/17784          | <i>WNT6 WNT7B WNT5A</i>                                                   |

|       |                                                       |          |          |                |                   |                                                                                    |
|-------|-------------------------------------------------------|----------|----------|----------------|-------------------|------------------------------------------------------------------------------------|
|       |                                                       |          |          | 1.4%           | 0.1%              |                                                                                    |
| 2758  | innate immune response-activating signal transduction | 1.43E-03 | 1.34E-02 | 3/202<br>1.4%  | 20/17784<br>0.1%  | <i>NFKBIA IRAK2 TLR7</i>                                                           |
| 23056 | positive regulation of signaling process              | 1.44E-03 | 1.35E-02 | 10/202<br>4.9% | 281/17784<br>1.5% | <i>CSF1 FGF9 IL1B UBD WNT5A TNFRSF11A IKBKE LMCD1 TMEM9B HBEGF</i>                 |
| 50776 | regulation of immune response                         | 1.50E-03 | 1.40E-02 | 9/202<br>4.4%  | 235/17784<br>1.3% | <i>STAT5A NFKBIA NOS2 IRAK2 IL1B WNT5A TLR7 ICAM1 MBL2</i>                         |
| 1654  | eye development                                       | 1.53E-03 | 1.42E-02 | 7/202<br>3.4%  | 148/17784<br>0.8% | <i>ALDH1A3 WNT7B WNT5A CYP1A1 AHRR PROX1 CRYAB</i>                                 |
| 19218 | regulation of steroid metabolic process               | 1.54E-03 | 1.42E-02 | 4/202<br>1.9%  | 44/17784<br>0.2%  | <i>STAT5A UGT1A1 PROX1 WNT4</i>                                                    |
| 45637 | regulation of myeloid cell differentiation            | 1.63E-03 | 1.50E-02 | 5/202<br>2.4%  | 75/17784<br>0.4%  | <i>STAT5A NFKBIA CSF1 TESC ETS1</i>                                                |
| 9725  | response to hormone stimulus                          | 1.64E-03 | 1.50E-02 | 13/202<br>6.4% | 441/17784<br>2.4% | <i>STAT5A IGFBP1 EGR1 OXTR EGR2 UGT1A1 TAT SERPINE1 FOS FOSL1 IL1B SLIT1 CRYAB</i> |
| 8299  | isoprenoid biosynthetic process                       | 1.65E-03 | 1.50E-02 | 3/202<br>1.4%  | 21/17784<br>0.1%  | <i>DHRS9 CYP1A1 AHRR</i>                                                           |
| 2218  | activation of innate immune response                  | 1.65E-03 | 1.50E-02 | 3/202<br>1.4%  | 21/17784<br>0.1%  | <i>NFKBIA IRAK2 TLR7</i>                                                           |
| 10469 | regulation of receptor activity                       | 1.65E-03 | 1.50E-02 | 3/202<br>1.4%  | 21/17784<br>0.1%  | <i>PLAU SERPINE1 TGFA</i>                                                          |
| 32677 | regulation of interleukin-8 production                | 1.65E-03 | 1.50E-02 | 3/202<br>1.4%  | 21/17784<br>0.1%  | <i>SERPINE1 BCL3 TLR7</i>                                                          |

|       |                                                                            |          |          |               |                   |                                                          |
|-------|----------------------------------------------------------------------------|----------|----------|---------------|-------------------|----------------------------------------------------------|
| 51046 | regulation of secretion                                                    | 1.83E-03 | 1.65E-02 | 9/202<br>4.4% | 242/17784<br>1.3% | <i>BTC OXTR NOS2 IL1B LGI3 WNT5A SAA1 SAA2 TNFRSF11A</i> |
| 7611  | learning or memory                                                         | 1.84E-03 | 1.65E-02 | 6/202<br>2.9% | 113/17784<br>0.6% | <i>FOSL1 EGR1 OXTR EGR2 IL1B FOS</i>                     |
| 70307 | lens fiber cell development                                                | 1.87E-03 | 1.65E-02 | 2/202<br>0.9% | 6/17784<br>0.0%   | <i>WNT7B PROX1</i>                                       |
| 9804  | coumarin metabolic process                                                 | 1.87E-03 | 1.65E-02 | 2/202<br>0.9% | 6/17784<br>0.0%   | <i>CYP1A1 AHRR</i>                                       |
| 50919 | negative chemotaxis                                                        | 1.87E-03 | 1.65E-02 | 2/202<br>0.9% | 6/17784<br>0.0%   | <i>SLIT1 ROBO1</i>                                       |
| 71560 | cellular response to transforming growth factor beta stimulus              | 1.87E-03 | 1.65E-02 | 2/202<br>0.9% | 6/17784<br>0.0%   | <i>WNT5A WNT4</i>                                        |
| 40037 | negative regulation of fibroblast growth factor receptor signaling pathway | 1.87E-03 | 1.65E-02 | 2/202<br>0.9% | 6/17784<br>0.0%   | <i>WNT5A WNT4</i>                                        |
| 16198 | axon choice point recognition                                              | 1.87E-03 | 1.65E-02 | 2/202<br>0.9% | 6/17784<br>0.0%   | <i>ROBO3 ROBO1</i>                                       |
| 70848 | response to growth factor stimulus                                         | 1.90E-03 | 1.66E-02 | 3/202<br>1.4% | 22/17784<br>0.1%  | <i>WNT5A DUSP6 WNT4</i>                                  |
| 1959  | regulation of cytokine-mediated signaling pathway                          | 1.90E-03 | 1.66E-02 | 3/202<br>1.4% | 22/17784<br>0.1%  | <i>IRAK2 SLIT1 ROBO1</i>                                 |
| 19439 | aromatic compound catabolic process                                        | 1.90E-03 | 1.66E-02 | 3/202<br>1.4% | 22/17784<br>0.1%  | <i>TAT CYP1A1 AHRR</i>                                   |

|       |                                                      |          |          |               |                   |                                                     |
|-------|------------------------------------------------------|----------|----------|---------------|-------------------|-----------------------------------------------------|
| 70201 | regulation of establishment of protein localization  | 1.91E-03 | 1.66E-02 | 7/202<br>3.4% | 154/17784<br>0.8% | <i>NFKBIA IL1B WNT5A BCL3 SAA1 SAA2 TLR7</i>        |
| 10817 | regulation of hormone levels                         | 1.91E-03 | 1.66E-02 | 7/202<br>3.4% | 154/17784<br>0.8% | <i>ALDH1A3 DHRS9 UGT1A1 CYP1A1 CYP1B1 AHRR WNT4</i> |
| 48520 | positive regulation of behavior                      | 1.97E-03 | 1.70E-02 | 4/202<br>1.9% | 47/17784<br>0.2%  | <i>CXCL10 CXCL8 SERPINE1 WNT5A</i>                  |
| 22612 | gland morphogenesis                                  | 2.05E-03 | 1.77E-02 | 5/202<br>2.4% | 79/17784<br>0.4%  | <i>STAT5A CSF1 WNT5A ROBO1 WNT4</i>                 |
| 71295 | cellular response to vitamin                         | 2.16E-03 | 1.85E-02 | 3/202<br>1.4% | 23/17784<br>0.1%  | <i>WNT6 WNT7B WNT5A</i>                             |
| 2690  | positive regulation of leukocyte chemotaxis          | 2.16E-03 | 1.85E-02 | 3/202<br>1.4% | 23/17784<br>0.1%  | <i>CXCL10 SERPINE1 WNT5A</i>                        |
| 60322 | head development                                     | 2.16E-03 | 1.85E-02 | 3/202<br>1.4% | 23/17784<br>0.1%  | <i>ALDH1A3 TIPARP WNT5A</i>                         |
| 32642 | regulation of chemokine production                   | 2.16E-03 | 1.85E-02 | 3/202<br>1.4% | 23/17784<br>0.1%  | <i>IL1B WNT5A TLR7</i>                              |
| 70482 | response to oxygen levels                            | 2.29E-03 | 1.94E-02 | 7/202<br>3.4% | 159/17784<br>0.8% | <i>OXTR NOS2 PLA2 CYP1A1 ITPR1 AHRR CRYAB</i>       |
| 45089 | positive regulation of innate immune response        | 2.30E-03 | 1.94E-02 | 4/202<br>1.9% | 49/17784<br>0.2%  | <i>STAT5A NFKBIA IRAK2 TLR7</i>                     |
| 71216 | cellular response to biotic stimulus                 | 2.30E-03 | 1.94E-02 | 4/202<br>1.9% | 49/17784<br>0.2%  | <i>NFKBIA IRAK2 SERPINE1 WNT5A</i>                  |
| 51091 | positive regulation of transcription factor activity | 2.42E-03 | 2.03E-02 | 5/202<br>2.4% | 82/17784<br>0.4%  | <i>IRAK2 IL1B WNT5A TNFRSF11A ICAM1</i>             |

|       |                                                         |          |          |               |                   |                                                          |
|-------|---------------------------------------------------------|----------|----------|---------------|-------------------|----------------------------------------------------------|
| 6766  | vitamin metabolic process                               | 2.42E-03 | 2.03E-02 | 5/202<br>2.4% | 82/17784<br>0.4%  | <i>ALDH1A3 DHRS9 UGT1A1 CYP1A1 AHRR</i>                  |
| 90047 | positive regulation of transcription regulator activity | 2.42E-03 | 2.03E-02 | 5/202<br>2.4% | 82/17784<br>0.4%  | <i>IRAK2 IL1B WNT5A TNFRSF11A ICAM1</i>                  |
| 45840 | positive regulation of mitosis                          | 2.45E-03 | 2.03E-02 | 3/202<br>1.4% | 24/17784<br>0.1%  | <i>BTC IL1B TGFA</i>                                     |
| 42345 | regulation of NF-kappaB import into nucleus             | 2.45E-03 | 2.03E-02 | 3/202<br>1.4% | 24/17784<br>0.1%  | <i>NFKB1A BCL3 TLR7</i>                                  |
| 1910  | regulation of leukocyte mediated cytotoxicity           | 2.45E-03 | 2.03E-02 | 3/202<br>1.4% | 24/17784<br>0.1%  | <i>STAT5A NOS2 ICAM1</i>                                 |
| 51785 | positive regulation of nuclear division                 | 2.45E-03 | 2.03E-02 | 3/202<br>1.4% | 24/17784<br>0.1%  | <i>BTC IL1B TGFA</i>                                     |
| 32570 | response to progesterone stimulus                       | 2.45E-03 | 2.03E-02 | 3/202<br>1.4% | 24/17784<br>0.1%  | <i>FOSL1 OXTR FOS</i>                                    |
| 30900 | forebrain development                                   | 2.46E-03 | 2.03E-02 | 7/202<br>3.4% | 161/17784<br>0.9% | <i>ALDH1A3 OXTR WNT7B WNT5A SLIT1 ROBO1 WNT4</i>         |
| 2009  | morphogenesis of an epithelium                          | 2.49E-03 | 2.05E-02 | 8/202<br>3.9% | 206/17784<br>1.1% | <i>STAT5A ALDH1A3 CSF1 WNT7B WNT5A ROBO1 RGMA WNT4</i>   |
| 46661 | male sex differentiation                                | 2.55E-03 | 2.09E-02 | 5/202<br>2.4% | 83/17784<br>0.4%  | <i>STAT5A GJB2 FGF9 WNT5A WNT4</i>                       |
| 40007 | growth                                                  | 2.57E-03 | 2.10E-02 | 8/202<br>3.9% | 207/17784<br>1.1% | <i>IGFBP1 CSF1 PLAU WNT7B SERPINE1 WNT5A SLIT1 ROBO1</i> |
| 71559 | response to transforming                                | 2.60E-03 | 2.11E-02 | 2/202         | 7/17784           | <i>WNT5A WNT4</i>                                        |

|       |                                                     |          |          |                |                   |                                                                        |
|-------|-----------------------------------------------------|----------|----------|----------------|-------------------|------------------------------------------------------------------------|
|       | growth factor beta stimulus                         |          |          | 0.9%           | 0.0%              |                                                                        |
| 43367 | CD4-positive, alpha beta T cell differentiation     | 2.60E-03 | 2.11E-02 | 2/202<br>0.9%  | 7/17784<br>0.0%   | <i>BCL3 RELB</i>                                                       |
| 10894 | negative regulation of steroid biosynthetic process | 2.60E-03 | 2.11E-02 | 2/202<br>0.9%  | 7/17784<br>0.0%   | <i>PROX1 WNT4</i>                                                      |
| 45597 | positive regulation of cell differentiation         | 2.61E-03 | 2.11E-02 | 9/202<br>4.4%  | 255/17784<br>1.4% | <i>BTC STAT5A CD83 CSF1 TESC WNT7B ETS1 ROBO1 WNT4</i>                 |
| 40008 | regulation of growth                                | 2.69E-03 | 2.17E-02 | 11/202<br>5.4% | 358/17784<br>2.0% | <i>STAT5A ABTB2 NPPB IGFBP1 CSF1 FGF9 SLIT1 PROX1 CRYAB HBEGF MBL2</i> |
| 8202  | steroid metabolic process                           | 2.73E-03 | 2.20E-02 | 8/202<br>3.9%  | 209/17784<br>1.1% | <i>DHRS9 UGT1A1 FABP6 APOF CYP1A1 CYP1B1 AHRR WNT4</i>                 |
| 33261 | regulation of S phase                               | 2.76E-03 | 2.20E-02 | 3/202<br>1.4%  | 25/17784<br>0.1%  | <i>CYP1A1 AHRR PROX1</i>                                               |
| 17144 | drug metabolic process                              | 2.76E-03 | 2.20E-02 | 3/202<br>1.4%  | 25/17784<br>0.1%  | <i>UGT1A1 CYP1A1 AHRR</i>                                              |
| 45927 | positive regulation of growth                       | 2.83E-03 | 2.25E-02 | 5/202<br>2.4%  | 85/17784<br>0.4%  | <i>STAT5A IGFBP1 CSF1 PROX1 HBEGF</i>                                  |
| 302   | response to reactive oxygen species                 | 2.98E-03 | 2.35E-02 | 5/202<br>2.4%  | 86/17784<br>0.4%  | <i>FOSL1 SERPINE1 OLR1 FOS CRYAB</i>                                   |
| 30278 | regulation of ossification                          | 2.98E-03 | 2.35E-02 | 5/202<br>2.4%  | 86/17784<br>0.4%  | <i>EGR2 CSF1 WNT7B WNT5A WNT4</i>                                      |
| 51222 | positive regulation of protein transport            | 2.98E-03 | 2.35E-02 | 5/202<br>2.4%  | 86/17784<br>0.4%  | <i>IL1B WNT5A SAA1 SAA2 TLR7</i>                                       |



|       |                                                                |          |          |                |                   |                                                                                                                        |
|-------|----------------------------------------------------------------|----------|----------|----------------|-------------------|------------------------------------------------------------------------------------------------------------------------|
| 32088 | negative regulation of NF-kappaB transcription factor activity | 3.10E-03 | 2.44E-02 | 3/202<br>1.4%  | 26/17784<br>0.1%  | <i>NFKBIA IRAK2 NFKBID</i>                                                                                             |
| 44057 | regulation of system process                                   | 3.16E-03 | 2.48E-02 | 10/202<br>4.9% | 313/17784<br>1.7% | <i>BTC NPPB EGR1 OXTR EGR2 NOS2 IL1B SSTR2 LMCD1 HBEGF</i>                                                             |
| 42592 | homeostatic process                                            | 3.26E-03 | 2.55E-02 | 18/202<br>8.9% | 775/17784<br>4.3% | <i>SLC34A3 STAT5A SERPINA3 OXTR EGR2 DYRK3 CSF1 WNT7B SERPINE1 ITPR1 TNFRSF11A NPPB IL1B SAA1 LCN2 SAA2 S1PR3 CCR6</i> |
| 45080 | positive regulation of chemokine biosynthetic process          | 3.44E-03 | 2.61E-02 | 2/202<br>0.9%  | 8/17784<br>0.0%   | <i>IL1B WNT5A</i>                                                                                                      |
| 42359 | vitamin D metabolic process                                    | 3.44E-03 | 2.61E-02 | 2/202<br>0.9%  | 8/17784<br>0.0%   | <i>CYP11A1 AHRR</i>                                                                                                    |
| 9629  | response to gravity                                            | 3.44E-03 | 2.61E-02 | 2/202<br>0.9%  | 8/17784<br>0.0%   | <i>FOSL1 FOS</i>                                                                                                       |
| 46543 | development of secondary female sexual characteristics         | 3.44E-03 | 2.61E-02 | 2/202<br>0.9%  | 8/17784<br>0.0%   | <i>STAT5A WNT5A</i>                                                                                                    |
| 32303 | regulation of icosanoid secretion                              | 3.44E-03 | 2.61E-02 | 2/202<br>0.9%  | 8/17784<br>0.0%   | <i>IL1B TNFRSF11A</i>                                                                                                  |
| 32305 | positive regulation of icosanoid secretion                     | 3.44E-03 | 2.61E-02 | 2/202<br>0.9%  | 8/17784<br>0.0%   | <i>IL1B TNFRSF11A</i>                                                                                                  |
| 32306 | regulation of prostaglandin secretion                          | 3.44E-03 | 2.61E-02 | 2/202<br>0.9%  | 8/17784<br>0.0%   | <i>IL1B TNFRSF11A</i>                                                                                                  |
| 32308 | positive regulation of prostaglandin secretion                 | 3.44E-03 | 2.61E-02 | 2/202<br>0.9%  | 8/17784<br>0.0%   | <i>IL1B TNFRSF11A</i>                                                                                                  |

|       |                                                             |          |          |               |                   |                                                         |
|-------|-------------------------------------------------------------|----------|----------|---------------|-------------------|---------------------------------------------------------|
| 48853 | forebrain morphogenesis                                     | 3.44E-03 | 2.61E-02 | 2/202<br>0.9% | 8/17784<br>0.0%   | <i>WNT5A SLIT1</i>                                      |
| 32652 | regulation of interleukin-1 production                      | 3.45E-03 | 2.61E-02 | 3/202<br>1.4% | 27/17784<br>0.1%  | <i>SAA1 SAA2 SIPR3</i>                                  |
| 2526  | acute inflammatory response                                 | 3.62E-03 | 2.73E-02 | 5/202<br>2.4% | 90/17784<br>0.5%  | <i>SERPINA3 TIFA SAA1 SAA2 MBL2</i>                     |
| 32880 | regulation of protein localization                          | 3.67E-03 | 2.75E-02 | 7/202<br>3.4% | 173/17784<br>0.9% | <i>NFKBIA IL1B WNT5A BCL3 SAA1 SAA2 TLR7</i>            |
| 31341 | regulation of cell killing                                  | 3.84E-03 | 2.87E-02 | 3/202<br>1.4% | 28/17784<br>0.1%  | <i>STAT5A NOS2 ICAM1</i>                                |
| 2688  | regulation of leukocyte chemotaxis                          | 3.84E-03 | 2.87E-02 | 3/202<br>1.4% | 28/17784<br>0.1%  | <i>CXCL10 SERPINE1 WNT5A</i>                            |
| 51130 | positive regulation of cellular component organization      | 3.93E-03 | 2.93E-02 | 8/202<br>3.9% | 222/17784<br>1.2% | <i>BTC OXTR IL1B SERPINE1 TGFA PROX1 ROBO1 MBL2</i>     |
| 10740 | positive regulation of intracellular protein kinase cascade | 3.93E-03 | 2.93E-02 | 8/202<br>3.9% | 222/17784<br>1.2% | <i>FGF9 IL1B UBD WNT5A TNFRSF11A IKBKE TMEM9B HBEGF</i> |
| 7411  | axon guidance                                               | 3.98E-03 | 2.94E-02 | 5/202<br>2.4% | 92/17784<br>0.5%  | <i>ROBO3 EGR2 SLIT1 LHX4 ROBO1</i>                      |
| 43433 | negative regulation of transcription factor activity        | 3.99E-03 | 2.94E-02 | 4/202<br>1.9% | 57/17784<br>0.3%  | <i>NFKBIA IRAK2 PROX1 NFKBID</i>                        |
| 32102 | negative regulation of response to external stimulus        | 3.99E-03 | 2.94E-02 | 4/202<br>1.9% | 57/17784<br>0.3%  | <i>SERPINE1 SAA1 SAA2 ROBO1</i>                         |
| 90048 | negative regulation of                                      | 3.99E-03 | 2.94E-02 | 4/202         | 57/17784          | <i>NFKBIA IRAK2 PROX1 NFKBID</i>                        |

|       |                                                       |           |          |          |               |                   |                                                              |
|-------|-------------------------------------------------------|-----------|----------|----------|---------------|-------------------|--------------------------------------------------------------|
|       | transcription activity                                | regulator |          |          | 1.9%          | 0.3%              |                                                              |
| 43388 | positive regulation of DNA binding                    |           | 4.17E-03 | 3.06E-02 | 5/202<br>2.4% | 93/17784<br>0.5%  | <i>IRAK2 IL1B WNT5A TNFRSF11A ICAM1</i>                      |
| 9110  | vitamin biosynthetic process                          |           | 4.24E-03 | 3.06E-02 | 3/202<br>1.4% | 29/17784<br>0.1%  | <i>DHRS9 CYP11A1 AHRR</i>                                    |
| 21983 | pituitary gland development                           |           | 4.24E-03 | 3.06E-02 | 3/202<br>1.4% | 29/17784<br>0.1%  | <i>ALDH1A3 WNT5A WNT4</i>                                    |
| 50715 | positive regulation of cytokine secretion             |           | 4.24E-03 | 3.06E-02 | 3/202<br>1.4% | 29/17784<br>0.1%  | <i>WNT5A SAA1 SAA2</i>                                       |
| 46677 | response to antibiotic                                |           | 4.24E-03 | 3.06E-02 | 3/202<br>1.4% | 29/17784<br>0.1%  | <i>CYP11A1 AHRR ETS1</i>                                     |
| 31670 | cellular response to nutrient                         |           | 4.24E-03 | 3.06E-02 | 3/202<br>1.4% | 29/17784<br>0.1%  | <i>WNT6 WNT7B WNT5A</i>                                      |
| 7595  | lactation                                             |           | 4.24E-03 | 3.06E-02 | 3/202<br>1.4% | 29/17784<br>0.1%  | <i>STAT5A OXTR APLN</i>                                      |
| 48729 | tissue morphogenesis                                  |           | 4.29E-03 | 3.07E-02 | 9/202<br>4.4% | 275/17784<br>1.5% | <i>STAT5A ALDH1A3 CSF1 WNT7B WNT5A PROX1 ROBO1 RGMA WNT4</i> |
| 30005 | cellular di-, tri-valent inorganic cation homeostasis |           | 4.38E-03 | 3.07E-02 | 8/202<br>3.9% | 226/17784<br>1.2% | <i>OXTR IL1B SAA1 ITPR1 LCN2 SAA2 SIPR3 CCR6</i>             |
| 45136 | development of secondary sexual characteristics       |           | 4.39E-03 | 3.07E-02 | 2/202<br>0.9% | 9/17784<br>0.0%   | <i>STAT5A WNT5A</i>                                          |
| 45414 | regulation of interleukin-8 biosynthetic process      |           | 4.39E-03 | 3.07E-02 | 2/202<br>0.9% | 9/17784<br>0.0%   | <i>BCL3 TLR7</i>                                             |

|       |                                           |          |          |               |                  |                                      |
|-------|-------------------------------------------|----------|----------|---------------|------------------|--------------------------------------|
| 17085 | response to insecticide                   | 4.39E-03 | 3.07E-02 | 2/202<br>0.9% | 9/17784<br>0.0%  | <i>CYP1A1 AHRR</i>                   |
| 50665 | hydrogen peroxide<br>biosynthetic process | 4.39E-03 | 3.07E-02 | 2/202<br>0.9% | 9/17784<br>0.0%  | <i>CYP1A1 AHRR</i>                   |
| 30316 | osteoclast differentiation                | 4.39E-03 | 3.07E-02 | 2/202<br>0.9% | 9/17784<br>0.0%  | <i>CSF1 TNFRSF11A</i>                |
| 30431 | sleep                                     | 4.39E-03 | 3.07E-02 | 2/202<br>0.9% | 9/17784<br>0.0%  | <i>OXTR FOS</i>                      |
| 43011 | myeloid dendritic cell<br>differentiation | 4.39E-03 | 3.07E-02 | 2/202<br>0.9% | 9/17784<br>0.0%  | <i>UBD RELB</i>                      |
| 31620 | regulation of fever                       | 4.39E-03 | 3.07E-02 | 2/202<br>0.9% | 9/17784<br>0.0%  | <i>IL1B TNFRSF11A</i>                |
| 31622 | positive regulation of fever              | 4.39E-03 | 3.07E-02 | 2/202<br>0.9% | 9/17784<br>0.0%  | <i>IL1B TNFRSF11A</i>                |
| 51783 | regulation of nuclear division            | 4.52E-03 | 3.15E-02 | 4/202<br>1.9% | 59/17784<br>0.3% | <i>BTC IL1B UBD TGFA</i>             |
| 7088  | regulation of mitosis                     | 4.52E-03 | 3.15E-02 | 4/202<br>1.9% | 59/17784<br>0.3% | <i>BTC IL1B UBD TGFA</i>             |
| 30098 | lymphocyte differentiation                | 4.56E-03 | 3.17E-02 | 5/202<br>2.4% | 95/17784<br>0.5% | <i>STAT5A EGR1 IRF1 BCL3 RELB</i>    |
| 30099 | myeloid cell differentiation              | 4.56E-03 | 3.17E-02 | 5/202<br>2.4% | 95/17784<br>0.5% | <i>DYRK3 CSF1 UBD TNFRSF11A RELB</i> |
| 45995 | regulation of embryonic<br>development    | 4.68E-03 | 3.23E-02 | 3/202<br>1.4% | 30/17784<br>0.1% | <i>IL1B LAMA4 WNT5A</i>              |

|       |                                                    |          |          |                |                   |                                                                              |
|-------|----------------------------------------------------|----------|----------|----------------|-------------------|------------------------------------------------------------------------------|
| 32663 | regulation of interleukin-2 production             | 4.68E-03 | 3.23E-02 | 3/202<br>1.4%  | 30/17784<br>0.1%  | <i>STAT5A CD83 IL1B</i>                                                      |
| 7417  | central nervous system development                 | 4.75E-03 | 3.27E-02 | 12/202<br>5.9% | 442/17784<br>2.4% | <i>RCAN1 ALDH1A3 OXTR EGR2 WNT7B WNT5A SLIT1 PROX1 NPTX1 LHX4 ROBO1 WNT4</i> |
| 31668 | cellular response to extracellular stimulus        | 4.77E-03 | 3.28E-02 | 5/202<br>2.4%  | 96/17784<br>0.5%  | <i>FOSL1 WNT6 WNT7B WNT5A FOS</i>                                            |
| 43193 | positive regulation of gene-specific transcription | 4.79E-03 | 3.28E-02 | 6/202<br>2.9%  | 137/17784<br>0.7% | <i>NFKBIA MEF2C TESC IL1B PROX1 ETS1</i>                                     |
| 45088 | regulation of innate immune response               | 4.80E-03 | 3.28E-02 | 4/202<br>1.9%  | 60/17784<br>0.3%  | <i>STAT5A NFKBIA IRAK2 TLR7</i>                                              |
| 71496 | cellular response to external stimulus             | 4.99E-03 | 3.39E-02 | 5/202<br>2.4%  | 97/17784<br>0.5%  | <i>FOSL1 WNT6 WNT7B WNT5A FOS</i>                                            |
| 32386 | regulation of intracellular transport              | 4.99E-03 | 3.39E-02 | 5/202<br>2.4%  | 97/17784<br>0.5%  | <i>NFKBIA IL1B BCL3 TLR7 CRYAB</i>                                           |
| 19932 | second-messenger-mediated signaling                | 4.99E-03 | 3.39E-02 | 8/202<br>3.9%  | 231/17784<br>1.2% | <i>RCAN1 CXCL8 NOS2 ADRA1D SIPR3 CA8 SSTR2 GNAI1</i>                         |
| 6979  | response to oxidative stress                       | 5.13E-03 | 3.46E-02 | 7/202<br>3.4%  | 184/17784<br>1.0% | <i>FOSL1 TAT SERPINE1 OLR1 FOS CRYAB MBL2</i>                                |
| 16525 | negative regulation of angiogenesis                | 5.13E-03 | 3.46E-02 | 3/202<br>1.4%  | 31/17784<br>0.1%  | <i>NPPB CXCL10 SERPINE1</i>                                                  |
| 42246 | tissue regeneration                                | 5.13E-03 | 3.46E-02 | 3/202<br>1.4%  | 31/17784<br>0.1%  | <i>IGFBP1 PLAU SERPINE1</i>                                                  |
| 51726 | regulation of cell cycle                           | 5.19E-03 | 3.49E-02 | 12/202<br>5.9% | 447/17784<br>2.5% | <i>BTC STAT5A FOSL1 CXCL8 IL1B UBD CYP11A1 TGFA AHRR CABLES1 PROX1 ETS1</i>  |

|       |                                                          |          |          |                |                   |                                                                    |
|-------|----------------------------------------------------------|----------|----------|----------------|-------------------|--------------------------------------------------------------------|
| 6874  | cellular calcium ion homeostasis                         | 5.28E-03 | 3.52E-02 | 7/202<br>3.4%  | 185/17784<br>1.0% | <i>OXTR IL1B SAA1 ITPR1 SAA2 SIPR3 CCR6</i>                        |
| 60429 | epithelium development                                   | 5.29E-03 | 3.52E-02 | 10/202<br>4.9% | 337/17784<br>1.8% | <i>STAT5A ALDH1A3 DHRS9 CSF1 WNT7B WNT5A PROX1 ROBO1 RGMA WNT4</i> |
| 46649 | lymphocyte activation                                    | 5.43E-03 | 3.52E-02 | 7/202<br>3.4%  | 186/17784<br>1.0% | <i>STAT5A EGR1 IRF1 BCL3 ICOSLG ICAM1 RELB</i>                     |
| 8210  | estrogen metabolic process                               | 5.44E-03 | 3.52E-02 | 2/202<br>0.9%  | 10/17784<br>0.0%  | <i>UGT1A1 CYP1B1</i>                                               |
| 70306 | lens fiber cell differentiation                          | 5.44E-03 | 3.52E-02 | 2/202<br>0.9%  | 10/17784<br>0.0%  | <i>WNT7B PROX1</i>                                                 |
| 42088 | T-helper 1 type immune response                          | 5.44E-03 | 3.52E-02 | 2/202<br>0.9%  | 10/17784<br>0.0%  | <i>BCL3 RELB</i>                                                   |
| 42104 | positive regulation of activated T cell proliferation    | 5.44E-03 | 3.52E-02 | 2/202<br>0.9%  | 10/17784<br>0.0%  | <i>STAT5A ICOSLG</i>                                               |
| 46685 | response to arsenic                                      | 5.44E-03 | 3.52E-02 | 2/202<br>0.9%  | 10/17784<br>0.0%  | <i>CYP1A1 AHRR</i>                                                 |
| 1773  | myeloid dendritic cell activation                        | 5.44E-03 | 3.52E-02 | 2/202<br>0.9%  | 10/17784<br>0.0%  | <i>UBD RELB</i>                                                    |
| 6105  | succinate metabolic process                              | 5.44E-03 | 3.52E-02 | 2/202<br>0.9%  | 10/17784<br>0.0%  | <i>STAT5A GAD1</i>                                                 |
| 43124 | negative regulation of I-kappaB kinase/NF-kappaB cascade | 5.44E-03 | 3.52E-02 | 2/202<br>0.9%  | 10/17784<br>0.0%  | <i>TNFAIP3 NFKBID</i>                                              |
| 43584 | nose development                                         | 5.44E-03 | 3.52E-02 | 2/202          | 10/17784          | <i>ALDH1A3 PROX1</i>                                               |

|       |                                                 |          |          |                 |                    |                                                                                                |
|-------|-------------------------------------------------|----------|----------|-----------------|--------------------|------------------------------------------------------------------------------------------------|
|       |                                                 |          |          | 0.9%            | 0.0%               |                                                                                                |
| 31650 | regulation of heat generation                   | 5.44E-03 | 3.52E-02 | 2/202<br>0.9%   | 10/17784<br>0.0%   | <i>IL1B TNFRSF11A</i>                                                                          |
| 31652 | positive regulation of heat generation          | 5.44E-03 | 3.52E-02 | 2/202<br>0.9%   | 10/17784<br>0.0%   | <i>IL1B TNFRSF11A</i>                                                                          |
| 31663 | lipopolysaccharide-mediated signaling pathway   | 5.44E-03 | 3.52E-02 | 2/202<br>0.9%   | 10/17784<br>0.0%   | <i>NFKBIA IRAK2</i>                                                                            |
| 48745 | smooth muscle tissue development                | 5.44E-03 | 3.52E-02 | 2/202<br>0.9%   | 10/17784<br>0.0%   | <i>TIPARP PROX1</i>                                                                            |
| 32757 | positive regulation of interleukin-8 production | 5.44E-03 | 3.52E-02 | 2/202<br>0.9%   | 10/17784<br>0.0%   | <i>SERPINE1 TLR7</i>                                                                           |
| 45727 | positive regulation of translation              | 5.62E-03 | 3.63E-02 | 3/202<br>1.4%   | 32/17784<br>0.1%   | <i>BCL3 FAM129A SAMD4A</i>                                                                     |
| 1822  | kidney development                              | 5.67E-03 | 3.65E-02 | 5/202<br>2.4%   | 100/17784<br>0.5%  | <i>ALDH1A3 TIPARP WNT7B PROX1 WNT4</i>                                                         |
| 9615  | response to virus                               | 5.89E-03 | 3.78E-02 | 6/202<br>2.9%   | 143/17784<br>0.8%  | <i>FOSL1 CCL22 BCL3 CYP1A1 AHRR TLR7</i>                                                       |
| 51093 | negative regulation of developmental process    | 5.90E-03 | 3.78E-02 | 9/202<br>4.4%   | 289/17784<br>1.6%  | <i>STAT5A NPPB NFKBIA CXCL10 SERPINE1 WNT5A SLIT1 NFKBID WNT4</i>                              |
| 9887  | organ morphogenesis                             | 5.98E-03 | 3.82E-02 | 15/202<br>7.4%  | 634/17784<br>3.5%  | <i>STAT5A CSF1 TIPARP WNT7B WNT5A PROX1 BARX2 ROBO1 RGMA WNT6 ALDH1A3 FGF9 SLIT1 LHX4 WNT4</i> |
| 7399  | nervous system development                      | 6.15E-03 | 3.92E-02 | 23/202<br>11.3% | 1154/17784<br>6.4% | <i>ROBO3 OXTR MEF2C EGR2 WNT7B WNT5A CABLES1 FOXN4 CXCL1 FOS PROX1 ROBO1</i>                   |

|       |                                                       |          |          |                 |                     |                                                                                                                                                                                                                                                                                                                                                                                   |
|-------|-------------------------------------------------------|----------|----------|-----------------|---------------------|-----------------------------------------------------------------------------------------------------------------------------------------------------------------------------------------------------------------------------------------------------------------------------------------------------------------------------------------------------------------------------------|
|       |                                                       |          |          |                 |                     | <i>RGMA RND1 SLC7A5 WNT6 RCAN1 ALDH1A3 GJA10 SLIT1 NPTX1 LHX4 WNT4</i>                                                                                                                                                                                                                                                                                                            |
| 904   | cell morphogenesis involved in differentiation        | 6.24E-03 | 3.97E-02 | 8/202<br>3.9%   | 240/17784<br>1.3%   | <i>ROBO3 EGR2 WNT5A SLIT1 PROX1 LHX4 ROBO1 WNT4</i>                                                                                                                                                                                                                                                                                                                               |
| 7568  | aging                                                 | 6.29E-03 | 3.99E-02 | 6/202<br>2.9%   | 145/17784<br>0.8%   | <i>TPRA1 NOS2 IL1B SERPINE1 FOS CRYAB</i>                                                                                                                                                                                                                                                                                                                                         |
| 32946 | positive regulation of mononuclear cell proliferation | 6.37E-03 | 4.02E-02 | 4/202<br>1.9%   | 65/17784<br>0.3%    | <i>STAT5A CSF1 IL1B ICOSLG</i>                                                                                                                                                                                                                                                                                                                                                    |
| 43392 | negative regulation of DNA binding                    | 6.37E-03 | 4.02E-02 | 4/202<br>1.9%   | 65/17784<br>0.3%    | <i>NFKBIA IRAK2 PROX1 NFKBID</i>                                                                                                                                                                                                                                                                                                                                                  |
| 55066 | di-, tri-valent inorganic cation homeostasis          | 6.40E-03 | 4.03E-02 | 8/202<br>3.9%   | 241/17784<br>1.3%   | <i>OXTR IL1B SAA1 ITPR1 LCN2 SAA2 SIPR3 CCR6</i>                                                                                                                                                                                                                                                                                                                                  |
| 19222 | regulation of metabolic process                       | 6.44E-03 | 4.03E-02 | 60/202<br>29.7% | 3918/17784<br>22.0% | <i>SERPINA3 CSF1 SERPINE1 TBC1D3F IKZF3 AREG ETS1 TBC1D3G ICAM1 DNMT3L SPRED1 ZNF169 LMCD1 VAV3 MEF2C MEF2B UGT1A1 PRKCE TESC WNT5A FOS PROX1 SSTR2 DUSP6 IL1B IRF1 AHRR TLR7 NCOA7 CRYAB HBEGF FAM129A TGFA TNFRSF11A BARX2 GNAI1 RELB RASGRP3 WNT6 IRAK2 TIFA SLIT1 SIPR3 WNT4 STAT5A EGR1 EGR2 NOS2 SAMD4A GRHL3 FOXN4 NFKB2 FOSL1 NFKBIA RCAN1 BCL3 MAFF FSBP LHX4 NFKBID</i> |
| 55074 | calcium ion homeostasis                               | 6.44E-03 | 4.03E-02 | 7/202<br>3.4%   | 192/17784<br>1.0%   | <i>OXTR IL1B SAA1 ITPR1 SAA2 SIPR3 CCR6</i>                                                                                                                                                                                                                                                                                                                                       |
| 45137 | development of primary sexual characteristics         | 6.50E-03 | 4.04E-02 | 6/202<br>2.9%   | 146/17784<br>0.8%   | <i>STAT5A GJB2 FGF9 WNT5A SLIT1 WNT4</i>                                                                                                                                                                                                                                                                                                                                          |



|       |                                                            |          |          |               |                   |                                           |
|-------|------------------------------------------------------------|----------|----------|---------------|-------------------|-------------------------------------------|
| 50778 | positive regulation of immune response                     | 6.50E-03 | 4.04E-02 | 6/202<br>2.9% | 146/17784<br>0.8% | <i>STAT5A NFKBIA IRAK2 IL1B TLR7 MBL2</i> |
| 45073 | regulation of chemokine biosynthetic process               | 6.60E-03 | 4.04E-02 | 2/202<br>0.9% | 11/17784<br>0.0%  | <i>IL1B WNT5A</i>                         |
| 32892 | positive regulation of organic acid transport              | 6.60E-03 | 4.04E-02 | 2/202<br>0.9% | 11/17784<br>0.0%  | <i>IL1B TNFRSF11A</i>                     |
| 42481 | regulation of odontogenesis                                | 6.60E-03 | 4.04E-02 | 2/202<br>0.9% | 11/17784<br>0.0%  | <i>WNT6 CSF1</i>                          |
| 50829 | defense response to Gram-negative bacterium                | 6.60E-03 | 4.04E-02 | 2/202<br>0.9% | 11/17784<br>0.0%  | <i>NOS2 SERPINE1</i>                      |
| 71363 | cellular response to growth factor stimulus                | 6.60E-03 | 4.04E-02 | 2/202<br>0.9% | 11/17784<br>0.0%  | <i>WNT5A WNT4</i>                         |
| 55093 | response to hyperoxia                                      | 6.60E-03 | 4.04E-02 | 2/202<br>0.9% | 11/17784<br>0.0%  | <i>CYP1A1 AHRR</i>                        |
| 1960  | negative regulation of cytokine-mediated signaling pathway | 6.60E-03 | 4.04E-02 | 2/202<br>0.9% | 11/17784<br>0.0%  | <i>SLIT1 ROBO1</i>                        |
| 32094 | response to food                                           | 6.60E-03 | 4.04E-02 | 2/202<br>0.9% | 11/17784<br>0.0%  | <i>CYP1A1 AHRR</i>                        |
| 71466 | cellular response to xenobiotic stimulus                   | 6.67E-03 | 4.07E-02 | 3/202<br>1.4% | 34/17784<br>0.1%  | <i>UGT1A1 CYP1A1 AHRR</i>                 |
| 6805  | xenobiotic metabolic process                               | 6.67E-03 | 4.07E-02 | 3/202<br>1.4% | 34/17784<br>0.1%  | <i>UGT1A1 CYP1A1 AHRR</i>                 |
| 70665 | positive regulation of                                     | 6.73E-03 | 4.10E-02 | 4/202         | 66/17784          | <i>STAT5A CSF1 IL1B ICOSLG</i>            |

|       |                                                         |          |          |                |                   |                                                                                                                                    |
|-------|---------------------------------------------------------|----------|----------|----------------|-------------------|------------------------------------------------------------------------------------------------------------------------------------|
|       | leukocyte proliferation                                 |          |          | 1.9%           | 0.3%              |                                                                                                                                    |
| 2697  | regulation of immune effector process                   | 6.95E-03 | 4.22E-02 | 5/202<br>2.4%  | 105/17784<br>0.5% | <i>STAT5A NOS2 IL1B WNT5A ICAM1</i>                                                                                                |
| 50801 | ion homeostasis                                         | 6.98E-03 | 4.23E-02 | 11/202<br>5.4% | 407/17784<br>2.2% | <i>SLC34A3 NPPB OXTR EGR2 IL1B SAA1 ITPR1 LCN2 SAA2 SIPR3 CCR6</i>                                                                 |
| 35295 | tube development                                        | 7.01E-03 | 4.24E-02 | 9/202<br>4.4%  | 297/17784<br>1.6% | <i>NPPB CSF1 FGF9 WNT7B WNT5A PROX1 ROBO1 RGMA WNT4</i>                                                                            |
| 6875  | cellular metal ion homeostasis                          | 7.18E-03 | 4.33E-02 | 7/202<br>3.4%  | 196/17784<br>1.1% | <i>OXTR IL1B SAA1 ITPR1 SAA2 SIPR3 CCR6</i>                                                                                        |
| 7423  | sensory organ development                               | 7.38E-03 | 4.42E-02 | 8/202<br>3.9%  | 247/17784<br>1.3% | <i>ALDH1A3 FGF9 WNT7B WNT5A CYP1A1 AHRR PROX1 CRYAB</i>                                                                            |
| 1666  | response to hypoxia                                     | 7.39E-03 | 4.42E-02 | 6/202<br>2.9%  | 150/17784<br>0.8% | <i>NOS2 PLAU CYP1A1 ITPR1 AHRR CRYAB</i>                                                                                           |
| 50790 | regulation of catalytic activity                        | 7.56E-03 | 4.52E-02 | 19/202<br>9.4% | 907/17784<br>5.1% | <i>VAV3 CSF1 SERPINE1 WNT5A TGFA TBC1D3F PROX1 TNFRSF11A SSTR2 DUSP6 GNAI1 TBC1D3G ROBO1 RASGRP3 RCAN1 SPRED1 IL1B SIPR3 CRYAB</i> |
| 48878 | chemical homeostasis                                    | 7.70E-03 | 4.59E-02 | 13/202<br>6.4% | 530/17784<br>2.9% | <i>SLC34A3 OXTR EGR2 WNT7B SERPINE1 ITPR1 NPPB IL1B SAA1 LCN2 SAA2 SIPR3 CCR6</i>                                                  |
| 7420  | brain development                                       | 7.78E-03 | 4.63E-02 | 9/202<br>4.4%  | 302/17784<br>1.6% | <i>ALDH1A3 OXTR EGR2 WNT7B WNT5A SLIT1 PROX1 ROBO1 WNT4</i>                                                                        |
| 45885 | positive regulation of survival gene product expression | 7.86E-03 | 4.65E-02 | 2/202<br>0.9%  | 12/17784<br>0.0%  | <i>STAT5A MEF2C</i>                                                                                                                |
| 6906  | vesicle fusion                                          | 7.86E-03 | 4.65E-02 | 2/202          | 12/17784          | <i>VAV3 STX6</i>                                                                                                                   |

|       |                                                       |          |          |               |                   |                                                  |
|-------|-------------------------------------------------------|----------|----------|---------------|-------------------|--------------------------------------------------|
|       |                                                       |          |          | 0.9%          | 0.0%              |                                                  |
| 43405 | regulation of MAP kinase activity                     | 7.86E-03 | 4.65E-02 | 6/202<br>2.9% | 152/17784<br>0.8% | <i>SPRED1 IL1B WNT5A TGFA TNFRSF11A DUSP6</i>    |
| 51099 | positive regulation of binding                        | 8.11E-03 | 4.79E-02 | 5/202<br>2.4% | 109/17784<br>0.6% | <i>IRAK2 IL1B WNT5A TNFRSF11A ICAM1</i>          |
| 30003 | cellular cation homeostasis                           | 8.28E-03 | 4.88E-02 | 8/202<br>3.9% | 252/17784<br>1.4% | <i>OXTR IL1B SAA1 ITPR1 LCN2 SAA2 SIPR3 CCR6</i> |
| 50707 | regulation of cytokine secretion                      | 8.45E-03 | 4.97E-02 | 3/202<br>1.4% | 37/17784<br>0.2%  | <i>WNT5A SAA1 SAA2</i>                           |
| 8210  | estrogen metabolic process                            | 5.44E-03 | 3.52E-02 | 2/202<br>0.9% | 10/17784<br>0.0%  | <i>UGT1A1 CYP1B1</i>                             |
| 70306 | lens fiber cell differentiation                       | 5.44E-03 | 3.52E-02 | 2/202<br>0.9% | 10/17784<br>0.0%  | <i>WNT7B PROX1</i>                               |
| 42088 | T-helper 1 type immune response                       | 5.44E-03 | 3.52E-02 | 2/202<br>0.9% | 10/17784<br>0.0%  | <i>BCL3 RELB</i>                                 |
| 42104 | positive regulation of activated T cell proliferation | 5.44E-03 | 3.52E-02 | 2/202<br>0.9% | 10/17784<br>0.0%  | <i>STAT5A ICOSLG</i>                             |
| 46685 | response to arsenic                                   | 5.44E-03 | 3.52E-02 | 2/202<br>0.9% | 10/17784<br>0.0%  | <i>CYP1A1 AHRR</i>                               |
| 1773  | myeloid dendritic cell activation                     | 5.44E-03 | 3.52E-02 | 2/202<br>0.9% | 10/17784<br>0.0%  | <i>UBD RELB</i>                                  |
| 6105  | succinate metabolic process                           | 5.44E-03 | 3.52E-02 | 2/202<br>0.9% | 10/17784<br>0.0%  | <i>STAT5A GADI</i>                               |

|       |                                                          |          |          |               |                   |                                                                   |
|-------|----------------------------------------------------------|----------|----------|---------------|-------------------|-------------------------------------------------------------------|
| 43124 | negative regulation of I-kappaB kinase/NF-kappaB cascade | 5.44E-03 | 3.52E-02 | 2/202<br>0.9% | 10/17784<br>0.0%  | <i>TNFAIP3 NFKBID</i>                                             |
| 43584 | nose development                                         | 5.44E-03 | 3.52E-02 | 2/202<br>0.9% | 10/17784<br>0.0%  | <i>ALDH1A3 PROX1</i>                                              |
| 31650 | regulation of heat generation                            | 5.44E-03 | 3.52E-02 | 2/202<br>0.9% | 10/17784<br>0.0%  | <i>IL1B TNFRSF11A</i>                                             |
| 31652 | positive regulation of heat generation                   | 5.44E-03 | 3.52E-02 | 2/202<br>0.9% | 10/17784<br>0.0%  | <i>IL1B TNFRSF11A</i>                                             |
| 31663 | lipopolysaccharide-mediated signaling pathway            | 5.44E-03 | 3.52E-02 | 2/202<br>0.9% | 10/17784<br>0.0%  | <i>NFKBIA IRAK2</i>                                               |
| 48745 | smooth muscle tissue development                         | 5.44E-03 | 3.52E-02 | 2/202<br>0.9% | 10/17784<br>0.0%  | <i>TIPARP PROX1</i>                                               |
| 32757 | positive regulation of interleukin-8 production          | 5.44E-03 | 3.52E-02 | 2/202<br>0.9% | 10/17784<br>0.0%  | <i>SERPINE1 TLR7</i>                                              |
| 45727 | positive regulation of translation                       | 5.62E-03 | 3.63E-02 | 3/202<br>1.4% | 32/17784<br>0.1%  | <i>BCL3 FAM129A SAMD4A</i>                                        |
| 1822  | kidney development                                       | 5.67E-03 | 3.65E-02 | 5/202<br>2.4% | 100/17784<br>0.5% | <i>ALDH1A3 TIPARP WNT7B PROX1 WNT4</i>                            |
| 9615  | response to virus                                        | 5.89E-03 | 3.78E-02 | 6/202<br>2.9% | 143/17784<br>0.8% | <i>FOSL1 CCL22 BCL3 CYP11A1 AHRR TLR7</i>                         |
| 51093 | negative regulation of developmental process             | 5.90E-03 | 3.78E-02 | 9/202<br>4.4% | 289/17784<br>1.6% | <i>STAT5A NPPB NFKBIA CXCL10 SERPINE1 WNT5A SLIT1 NFKBID WNT4</i> |
| 9887  | organ morphogenesis                                      | 5.98E-03 | 3.82E-02 | 15/202        | 634/17784         | <i>STAT5A CSF1 TIPARP WNT7B WNT5A PROX1</i>                       |

|       |                                                       |          |          |                 |                     |                                                                                                                                                                                                                                                                                                                                                                                   |
|-------|-------------------------------------------------------|----------|----------|-----------------|---------------------|-----------------------------------------------------------------------------------------------------------------------------------------------------------------------------------------------------------------------------------------------------------------------------------------------------------------------------------------------------------------------------------|
|       |                                                       |          |          | 7.4%            | 3.5%                | <i>BARX2 ROBO1 RGMA WNT6 ALDH1A3 FGF9 SLIT1 LHX4 WNT4</i>                                                                                                                                                                                                                                                                                                                         |
| 7399  | nervous system development                            | 6.15E-03 | 3.92E-02 | 23/202<br>11.3% | 1154/17784<br>6.4%  | <i>ROBO3 OXTR MEF2C EGR2 WNT7B WNT5A CABLES1 FOXP4 CXCL1 FOS PROX1 ROBO1 RGMA RND1 SLC7A5 WNT6 RCAN1 ALDH1A3 GJA10 SLIT1 NPTX1 LHX4 WNT4</i>                                                                                                                                                                                                                                      |
| 904   | cell morphogenesis involved in differentiation        | 6.24E-03 | 3.97E-02 | 8/202<br>3.9%   | 240/17784<br>1.3%   | <i>ROBO3 EGR2 WNT5A SLIT1 PROX1 LHX4 ROBO1 WNT4</i>                                                                                                                                                                                                                                                                                                                               |
| 7568  | aging                                                 | 6.29E-03 | 3.99E-02 | 6/202<br>2.9%   | 145/17784<br>0.8%   | <i>TPRA1 NOS2 IL1B SERPINE1 FOS CRYAB</i>                                                                                                                                                                                                                                                                                                                                         |
| 32946 | positive regulation of mononuclear cell proliferation | 6.37E-03 | 4.02E-02 | 4/202<br>1.9%   | 65/17784<br>0.3%    | <i>STAT5A CSF1 IL1B ICOSLG</i>                                                                                                                                                                                                                                                                                                                                                    |
| 43392 | negative regulation of DNA binding                    | 6.37E-03 | 4.02E-02 | 4/202<br>1.9%   | 65/17784<br>0.3%    | <i>NFKBIA IRAK2 PROX1 NFKBID</i>                                                                                                                                                                                                                                                                                                                                                  |
| 55066 | di-, tri-valent inorganic cation homeostasis          | 6.40E-03 | 4.03E-02 | 8/202<br>3.9%   | 241/17784<br>1.3%   | <i>OXTR IL1B SAA1 ITPR1 LCN2 SAA2 S1PR3 CCR6</i>                                                                                                                                                                                                                                                                                                                                  |
| 19222 | regulation of metabolic process                       | 6.44E-03 | 4.03E-02 | 60/202<br>29.7% | 3918/17784<br>22.0% | <i>SERPINA3 CSF1 SERPINE1 TBC1D3F IKZF3 AREG ETS1 TBC1D3G ICAM1 DNMT3L SPRED1 ZNF169 LMCD1 VAV3 MEF2C MEF2B UGT1A1 PRKCE TESC WNT5A FOS PROX1 SSTR2 DUSP6 IL1B IRF1 AHRR TLR7 NCOA7 CRYAB HBEGF FAM129A TGFA TNFRSF11A BARX2 GNAT1 RELB RASGRP3 WNT6 IRAK2 TIFA SLIT1 S1PR3 WNT4 STAT5A EGR1 EGR2 NOS2 SAMD4A GRHL3 FOXP4 NFKB2 FOSL1 NFKBIA RCAN1 BCL3 MAFF FSBP LHX4 NFKBID</i> |

|       |                                                            |          |          |               |                   |                                             |
|-------|------------------------------------------------------------|----------|----------|---------------|-------------------|---------------------------------------------|
| 55074 | calcium ion homeostasis                                    | 6.44E-03 | 4.03E-02 | 7/202<br>3.4% | 192/17784<br>1.0% | <i>OXTR IL1B SAA1 ITPR1 SAA2 SIPR3 CCR6</i> |
| 45137 | development of primary sexual characteristics              | 6.50E-03 | 4.04E-02 | 6/202<br>2.9% | 146/17784<br>0.8% | <i>STAT5A GJB2 FGF9 WNT5A SLIT1 WNT4</i>    |
| 50778 | positive regulation of immune response                     | 6.50E-03 | 4.04E-02 | 6/202<br>2.9% | 146/17784<br>0.8% | <i>STAT5A NFKBIA IRAK2 IL1B TLR7 MBL2</i>   |
| 45073 | regulation of chemokine biosynthetic process               | 6.60E-03 | 4.04E-02 | 2/202<br>0.9% | 11/17784<br>0.0%  | <i>IL1B WNT5A</i>                           |
| 32892 | positive regulation of organic acid transport              | 6.60E-03 | 4.04E-02 | 2/202<br>0.9% | 11/17784<br>0.0%  | <i>IL1B TNFRSF11A</i>                       |
| 42481 | regulation of odontogenesis                                | 6.60E-03 | 4.04E-02 | 2/202<br>0.9% | 11/17784<br>0.0%  | <i>WNT6 CSF1</i>                            |
| 50829 | defense response to Gram-negative bacterium                | 6.60E-03 | 4.04E-02 | 2/202<br>0.9% | 11/17784<br>0.0%  | <i>NOS2 SERPINE1</i>                        |
| 71363 | cellular response to growth factor stimulus                | 6.60E-03 | 4.04E-02 | 2/202<br>0.9% | 11/17784<br>0.0%  | <i>WNT5A WNT4</i>                           |
| 55093 | response to hyperoxia                                      | 6.60E-03 | 4.04E-02 | 2/202<br>0.9% | 11/17784<br>0.0%  | <i>CYP1A1 AHRR</i>                          |
| 1960  | negative regulation of cytokine-mediated signaling pathway | 6.60E-03 | 4.04E-02 | 2/202<br>0.9% | 11/17784<br>0.0%  | <i>SLIT1 ROBO1</i>                          |
| 32094 | response to food                                           | 6.60E-03 | 4.04E-02 | 2/202<br>0.9% | 11/17784<br>0.0%  | <i>CYP1A1 AHRR</i>                          |
| 71466 | cellular response to                                       | 6.67E-03 | 4.07E-02 | 3/202         | 34/17784          | <i>UGT1A1 CYP1A1 AHRR</i>                   |

|       |                                                |          |          |                |                   |                                                                                                                                    |
|-------|------------------------------------------------|----------|----------|----------------|-------------------|------------------------------------------------------------------------------------------------------------------------------------|
|       | xenobiotic stimulus                            |          |          | 1.4%           | 0.1%              |                                                                                                                                    |
| 6805  | xenobiotic metabolic process                   | 6.67E-03 | 4.07E-02 | 3/202<br>1.4%  | 34/17784<br>0.1%  | <i>UGT1A1 CYP1A1 AHRR</i>                                                                                                          |
| 70665 | positive regulation of leukocyte proliferation | 6.73E-03 | 4.10E-02 | 4/202<br>1.9%  | 66/17784<br>0.3%  | <i>STAT5A CSF1 IL1B ICOSLG</i>                                                                                                     |
| 2697  | regulation of immune effector process          | 6.95E-03 | 4.22E-02 | 5/202<br>2.4%  | 105/17784<br>0.5% | <i>STAT5A NOS2 IL1B WNT5A ICAM1</i>                                                                                                |
| 50801 | ion homeostasis                                | 6.98E-03 | 4.23E-02 | 11/202<br>5.4% | 407/17784<br>2.2% | <i>SLC34A3 NPPB OXTR EGR2 IL1B SAA1 ITPR1 LCN2 SAA2 S1PR3 CCR6</i>                                                                 |
| 35295 | tube development                               | 7.01E-03 | 4.24E-02 | 9/202<br>4.4%  | 297/17784<br>1.6% | <i>NPPB CSF1 FGF9 WNT7B WNT5A PROX1 ROBO1 RGMA WNT4</i>                                                                            |
| 6875  | cellular metal ion homeostasis                 | 7.18E-03 | 4.33E-02 | 7/202<br>3.4%  | 196/17784<br>1.1% | <i>OXTR IL1B SAA1 ITPR1 SAA2 S1PR3 CCR6</i>                                                                                        |
| 7423  | sensory organ development                      | 7.38E-03 | 4.42E-02 | 8/202<br>3.9%  | 247/17784<br>1.3% | <i>ALDH1A3 FGF9 WNT7B WNT5A CYP1A1 AHRR PROX1 CRYAB</i>                                                                            |
| 1666  | response to hypoxia                            | 7.39E-03 | 4.42E-02 | 6/202<br>2.9%  | 150/17784<br>0.8% | <i>NOS2 PLAU CYP1A1 ITPR1 AHRR CRYAB</i>                                                                                           |
| 50790 | regulation of catalytic activity               | 7.56E-03 | 4.52E-02 | 19/202<br>9.4% | 907/17784<br>5.1% | <i>VAV3 CSF1 SERPINE1 WNT5A TGFA TBC1D3F PROX1 TNFRSF11A SSTR2 DUSP6 GNAI1 TBC1D3G ROBO1 RASGRP3 RCAN1 SPRED1 IL1B S1PR3 CRYAB</i> |
| 48878 | chemical homeostasis                           | 7.70E-03 | 4.59E-02 | 13/202<br>6.4% | 530/17784<br>2.9% | <i>SLC34A3 OXTR EGR2 WNT7B SERPINE1 ITPR1 NPPB IL1B SAA1 LCN2 SAA2 S1PR3 CCR6</i>                                                  |

|                           |                                                               |          |          |                 |                   |                                                                                            |
|---------------------------|---------------------------------------------------------------|----------|----------|-----------------|-------------------|--------------------------------------------------------------------------------------------|
| 7420                      | brain development                                             | 7.78E-03 | 4.63E-02 | 9/202<br>4.4%   | 302/17784<br>1.6% | <i>ALDH1A3 OXTR EGR2 WNT7B WNT5A SLIT1<br/>PROX1 ROBO1 WNT4</i>                            |
| 45885                     | positive regulation of<br>survival gene product<br>expression | 7.86E-03 | 4.65E-02 | 2/202<br>0.9%   | 12/17784<br>0.0%  | <i>STAT5A MEF2C</i>                                                                        |
| 6906                      | vesicle fusion                                                | 7.86E-03 | 4.65E-02 | 2/202<br>0.9%   | 12/17784<br>0.0%  | <i>VAV3 STX6</i>                                                                           |
| 43405                     | regulation of MAP kinase<br>activity                          | 7.86E-03 | 4.65E-02 | 6/202<br>2.9%   | 152/17784<br>0.8% | <i>SPRED1 IL1B WNT5A TGFA TNFRSF11A DUSP6</i>                                              |
| 51099                     | positive regulation of<br>binding                             | 8.11E-03 | 4.79E-02 | 5/202<br>2.4%   | 109/17784<br>0.6% | <i>IRAK2 IL1B WNT5A TNFRSF11A ICAM1</i>                                                    |
| 30003                     | cellular cation homeostasis                                   | 8.28E-03 | 4.88E-02 | 8/202<br>3.9%   | 252/17784<br>1.4% | <i>OXTR IL1B SAA1 ITPR1 LCN2 SAA2 S1PR3 CCR6</i>                                           |
| 50707                     | regulation of cytokine<br>secretion                           | 8.45E-03 | 4.97E-02 | 3/202<br>1.4%   | 37/17784<br>0.2%  | <i>WNT5A SAA1 SAA2</i>                                                                     |
| <b>Molecular function</b> |                                                               |          |          |                 |                   |                                                                                            |
| 8009                      | chemokine activity                                            | 2.47E-09 | 2.64E-07 | 9/202<br>4.4%   | 47/17784<br>0.2%  | <i>CXCL10 CXCL11 CCL22 CXCL8 CCL20 CXCL1<br/>CXCL3 CXCL2 CX3CL1</i>                        |
| 42379                     | chemokine receptor binding                                    | 6.35E-09 | 6.33E-07 | 9/202<br>4.4%   | 52/17784<br>0.2%  | <i>CXCL10 CXCL11 CCL22 CXCL8 CCL20 CXCL1<br/>CXCL3 CXCL2 CX3CL1</i>                        |
| 1664                      | G-protein-coupled receptor<br>binding                         | 4.92E-08 | 3.77E-06 | 12/202<br>5.9%  | 136/17784<br>0.7% | <i>CXCL10 CXCL11 CCL22 CXCL8 CCL20 WNT5A<br/>SAA1 SAA2 CXCL1 CXCL3 CXCL2 CX3CL1</i>        |
| 5102                      | receptor binding                                              | 5.53E-08 | 4.13E-06 | 31/202<br>15.3% | 922/17784<br>5.1% | <i>CXCL8 CSF1 LAMA4 TGFA CXCL1 CXCL3 AREG<br/>CXCL2 CX3CL1 ICAM1 NPPB SPRED1 FGF9 TIFA</i> |



|      |                                          |          |          |                  |                     |                                                                                                                                                                                                                                                                                                                                                                                                                                                                                                                                                                                                                                                                                                                                                                                |
|------|------------------------------------------|----------|----------|------------------|---------------------|--------------------------------------------------------------------------------------------------------------------------------------------------------------------------------------------------------------------------------------------------------------------------------------------------------------------------------------------------------------------------------------------------------------------------------------------------------------------------------------------------------------------------------------------------------------------------------------------------------------------------------------------------------------------------------------------------------------------------------------------------------------------------------|
|      |                                          |          |          |                  |                     | <i>APOF SLIT1 ICOSLG MBL2 VAV3 CCL22 CCL20 WNT5A PROX1 APLN BTC CXCL10 CXCL11 IL1B SAA1 SAA2 HBEGF</i>                                                                                                                                                                                                                                                                                                                                                                                                                                                                                                                                                                                                                                                                         |
| 5126 | cytokine receptor binding                | 2.13E-07 | 1.27E-05 | 13/202<br>6.4%   | 186/17784<br>1.0%   | <i>CCL22 CXCL8 CSF1 CCL20 CXCL1 CXCL3 CXCL2 CX3CL1 CXCL10 CXCL11 SPRED1 IL1B TIFA</i>                                                                                                                                                                                                                                                                                                                                                                                                                                                                                                                                                                                                                                                                                          |
| 5125 | cytokine activity                        | 4.12E-07 | 2.16E-05 | 13/202<br>6.4%   | 197/17784<br>1.1%   | <i>CCL22 CXCL8 CSF1 CCL20 CXCL1 CXCL3 AREG CXCL2 CX3CL1 CXCL10 CXCL11 IL1B TIFA</i>                                                                                                                                                                                                                                                                                                                                                                                                                                                                                                                                                                                                                                                                                            |
| 5515 | protein binding                          | 4.61E-06 | 1.68E-04 | 124/202<br>61.3% | 8122/17784<br>45.6% | <i>OXTR CSF1 SERPINE1 IKZF3 ETS1 ACTG2 ICAM1 EDC3 NPPB FGF9 CYP1B1 PHLDA1 ICOSLG IER3 IGFBP1 MEF2C MEF2B SNRPN PRKCE WNT5A TUBA4A BTC S100A3 ATP6V0D2 ABCG2 NXPH3 ITPR1 TGFA DAPP1 TNFRSF11A RASGRP3 IRAK2 UBD APOF PACSIN1 WNT4 STAT5A EGR1 KCNF1 EGR2 TIPARP TNFRSF9 FHDC1 LSM4 NFKB2 FOSL1 ABTB2 NFKBIA RCAN1 CXCL10 GJB2 CXCL11 BCL3 CYP1A1 RNF183 NFKBID SERPINA3 DYRK3 DOCK3 CXCL8 TNFAIP3 CXCL1 CXCL3 AREG CXCL2 CX3CL1 ROBO1 RND1 DNMT3L SPRED1 OLR1 PGM5 CCR6 CA8 IKBKE LMCD1 MBL2 VAV3 FGFBP1 UGT1A1 TESC FOS PROX1 SSTR2 DUSP6 ALDH1A3 MRAS SNPH IL1B CDH11 AHR TLR7 NCOA7 MYH4 SOS1 CRYAB VAMP2 HBEGF BIRC3 LAMA4 RGS16 BARX2 GNAI1 STX11 RELB SERTAD4 TIFA STX6 SLIT1 TRIM40 CCL22 NOS2 CCL20 GAD1 LGI3 CABLES1 GRHL3 APLN KRT17 NEURL3 SAA1 SAA2 TRIM36 FSBP</i> |
| 5154 | epidermal growth factor receptor binding | 1.07E-05 | 3.18E-04 | 4/202<br>1.9%    | 13/17784<br>0.0%    | <i>BTC VAV3 TGFA HBEGF</i>                                                                                                                                                                                                                                                                                                                                                                                                                                                                                                                                                                                                                                                                                                                                                     |

|       |                                                                                                                                                                                             |          |          |                  |                      |                                                                                                                                                                                                                                             |
|-------|---------------------------------------------------------------------------------------------------------------------------------------------------------------------------------------------|----------|----------|------------------|----------------------|---------------------------------------------------------------------------------------------------------------------------------------------------------------------------------------------------------------------------------------------|
| 16711 | flavonoid 3'-monooxygenase activity                                                                                                                                                         | 1.28E-04 | 2.22E-03 | 2/202<br>0.9%    | 2/17784<br>0.0%      | <i>CYP1A1 AHRR</i>                                                                                                                                                                                                                          |
| 70851 | growth factor receptor binding                                                                                                                                                              | 3.41E-04 | 4.90E-03 | 6/202<br>2.9%    | 82/17784<br>0.4%     | <i>BTC VAV3 FGF9 IL1B TGFA HBEGF</i>                                                                                                                                                                                                        |
| 8083  | growth factor activity                                                                                                                                                                      | 4.93E-04 | 6.27E-03 | 8/202<br>3.9%    | 160/17784<br>0.8%    | <i>BTC CSF1 FGF9 IL1B TGFA CXCL1 AREG HBEGF</i>                                                                                                                                                                                             |
| 70576 | vitamin D 24-hydroxylase activity                                                                                                                                                           | 7.59E-04 | 8.66E-03 | 2/202<br>0.9%    | 4/17784<br>0.0%      | <i>CYP1A1 AHRR</i>                                                                                                                                                                                                                          |
| 4704  | NF-kappaB-inducing kinase activity                                                                                                                                                          | 1.26E-03 | 1.21E-02 | 2/202<br>0.9%    | 5/17784<br>0.0%      | <i>IRAK2 IKBKE</i>                                                                                                                                                                                                                          |
| 4030  | aldehyde dehydrogenase [NAD(P)+] activity                                                                                                                                                   | 1.87E-03 | 1.65E-02 | 2/202<br>0.9%    | 6/17784<br>0.0%      | <i>ALDH3A1 ALDH1A3</i>                                                                                                                                                                                                                      |
| 70330 | aromatase activity                                                                                                                                                                          | 2.76E-03 | 2.20E-02 | 3/202<br>1.4%    | 25/17784<br>0.1%     | <i>CYP1A1 CYP1B1 AHRR</i>                                                                                                                                                                                                                   |
| 16712 | oxidoreductase activity, acting on paired donors, with incorporation or reduction of molecular oxygen, reduced flavin or flavoprotein as one donor, and incorporation of one atom of oxygen | 3.45E-03 | 2.61E-02 | 3/202<br>1.4%    | 27/17784<br>0.1%     | <i>CYP1A1 CYP1B1 AHRR</i>                                                                                                                                                                                                                   |
| 5488  | binding                                                                                                                                                                                     | 3.51E-03 | 2.65E-02 | 158/202<br>78.2% | 12362/17784<br>69.5% | <i>OXTR CSF1 GALNT18 SERPINE1 RASEF IKZF3 ETS1 ACTG2 ICAM1 EDC3 ZC3H12D NPPB RAB43 FGF9 ZC3H12A CYP1B1 ZNF169 PHLDA1 ICOSLG IER3 IGFBP1 MEF2C UNC13A MEF2B SNRPN ARL14 PRKCE WNT5A FRMD4A RNASE2 TUBA4A BTC ALPK3 S100A3 ATP6V0D2 ABCG2</i> |

|       |                                                                                                                                                                                              |          |          |                |                   |                                                                                                                                                                                                                                                                                                                                                                                                                                                                                                                                                                                                                                                                                                                                                                                                                                                                |
|-------|----------------------------------------------------------------------------------------------------------------------------------------------------------------------------------------------|----------|----------|----------------|-------------------|----------------------------------------------------------------------------------------------------------------------------------------------------------------------------------------------------------------------------------------------------------------------------------------------------------------------------------------------------------------------------------------------------------------------------------------------------------------------------------------------------------------------------------------------------------------------------------------------------------------------------------------------------------------------------------------------------------------------------------------------------------------------------------------------------------------------------------------------------------------|
|       |                                                                                                                                                                                              |          |          |                |                   | <i>NXPH3 ITPR1 TGFA DAPP1 TNFRSF11A<br/> RASGRP3 ARL17B IRAK2 UBD APOF NPTX1<br/> PACSIN1 WNT4 STAT5A EGR1 APOBEC3D KCNF1<br/> EGR2 TIPARP LHFP TNFRSF9 FOXN4 FHDC1<br/> LSM4 NFKB2 FOSL1 ABTB2 NFKBIA RCAN1<br/> CXCL10 GJB2 CXCL11 BCL3 MAFF CYP1A1 LCN2<br/> LHX4 RNF183 NFKBID SERPINA3 DYRK3 DOCK3<br/> CXCL8 TAT TNFAIP3 CXCL1 CXCL3 AREG CXCL2<br/> CX3CL1 ROBO1 RND1 MMP25 DNMT3L ACOXL<br/> SPRED1 OLR1 PGM5 CCR6 CA8 IKBKE LMCD1<br/> MBL2 VAV3 FGFBP1 UGT1A1 PCDHGA3 TESC<br/> HUNK FOS PROX1 SSTR2 DUSP6 SLC7A5<br/> ALDH1A3 MRAS SNPH IL1B IRF1 CDH11 AHRR<br/> TLR7 NCOA7 MYH4 SOS1 CRYAB VAMP2 HBEGF<br/> BIRC3 LAMA4 RGS16 GDPD1 ATP10B BARX2<br/> GNAI1 STX11 RELB SERTAD4 TIFA STX6 SLIT1<br/> TDH SIPR3 TRIM40 CCL22 NOS2 CCL20 GADI<br/> LGI3 CABLES1 GRHL3 APLN DLK2 KRT17 DHRS9<br/> FABP6 NEURL3 SAA1 ATP13A4 SAA2 TRIM36<br/> FSBP</i> |
| 16709 | oxidoreductase activity,<br>acting on paired donors, with<br>incorporation or reduction of<br>molecular oxygen, NADH or<br>NADPH as one donor, and<br>incorporation of one atom of<br>oxygen | 4.24E-03 | 3.06E-02 | 3/202<br>1.4%  | 29/17784<br>0.1%  | <i>NOS2 CYP1A1 AHRR</i>                                                                                                                                                                                                                                                                                                                                                                                                                                                                                                                                                                                                                                                                                                                                                                                                                                        |
| 30234 | enzyme regulator activity                                                                                                                                                                    | 4.35E-03 | 3.07E-02 | 19/202<br>9.4% | 860/17784<br>4.8% | <i>VAV3 SERPINA3 SERPINB2 DOCK3 UGT1A1<br/> NOS2 PRKCE TESC RGS16 SERPINE1 TBC1D3F<br/> CABLES1 CXCL1 TBC1D3G RASGRP3 CXCL10<br/> MMP25 DNMT3L SOS1</i>                                                                                                                                                                                                                                                                                                                                                                                                                                                                                                                                                                                                                                                                                                        |

|                           |                                                                               |          |          |                 |                     |                                                                                                                                                                                                                                   |
|---------------------------|-------------------------------------------------------------------------------|----------|----------|-----------------|---------------------|-----------------------------------------------------------------------------------------------------------------------------------------------------------------------------------------------------------------------------------|
| 4029                      | aldehyde dehydrogenase (NAD) activity                                         | 4.39E-03 | 3.07E-02 | 2/202<br>0.9%   | 9/17784<br>0.0%     | <i>ALDH3A1 ALDH1A3</i>                                                                                                                                                                                                            |
| 16679                     | oxidoreductase activity, acting on diphenols and related substances as donors | 5.44E-03 | 3.52E-02 | 2/202<br>0.9%   | 10/17784<br>0.0%    | <i>CYP1A1 AHRR</i>                                                                                                                                                                                                                |
| 3700                      | transcription factor activity                                                 | 5.87E-03 | 3.77E-02 | 20/202<br>9.9%  | 950/17784<br>5.3%   | <i>STAT5A EGR1 MEF2C EGR2 MEF2B FOXN4 FOS PROX1 IKZF3 ETS1 BARX2 RELB NFKB2 FOSL1 RCAN1 IRF1 BCL3 MAFF LHX4 ZNF169</i>                                                                                                            |
| 8047                      | enzyme activator activity                                                     | 6.33E-03 | 4.01E-02 | 10/202<br>4.9%  | 346/17784<br>1.9%   | <i>VAV3 MMP25 DNMT3L PRKCE RGS16 TBC1D3F CXCL1 SOS1 TBC1D3G RASGRP3</i>                                                                                                                                                           |
| 5243                      | gap junction channel activity                                                 | 6.60E-03 | 4.04E-02 | 2/202<br>0.9%   | 11/17784<br>0.0%    | <i>GJB2 GJA10</i>                                                                                                                                                                                                                 |
| <b>Cellular component</b> |                                                                               |          |          |                 |                     |                                                                                                                                                                                                                                   |
| 5615                      | extracellular space                                                           | 1.91E-11 | 6.33E-09 | 33/202<br>16.3% | 747/17784<br>4.2%   | <i>CXCL8 CSF1 SERPINE1 TNFAIP2 TGFA CXCL1 CXCL3 AREG CXCL2 CX3CL1 ICAM1 NPPB FGF9 PLAU TIFA APOF SLIT1 LMCD1 WNT4 MBL2 IGFBP1 FGFBP1 SERPINB2 CCL22 CCL20 WNT5A BTC CXCL10 CXCL11 IL1B SAA1 SAA2 HBEGF</i>                        |
| 44421                     | extracellular region part                                                     | 1.00E-10 | 2.50E-08 | 37/202<br>18.3% | 983/17784<br>5.5%   | <i>CXCL8 CSF1 LAMA4 SERPINE1 TNFAIP2 TGFA CXCL1 CXCL3 AREG CXCL2 CX3CL1 ICAM1 NPPB WNT6 MMP25 FGF9 PLAU TIFA APOF SLIT1 LMCD1 WNT4 MBL2 IGFBP1 FGFBP1 SERPINB2 CCL22 CCL20 WNT7B WNT5A BTC CXCL10 CXCL11 IL1B SAA1 SAA2 HBEGF</i> |
| 5576                      | extracellular region                                                          | 1.91E-07 | 1.19E-05 | 49/202<br>24.2% | 2025/17784<br>11.3% | <i>SERPINA3 OLFML2B CXCL8 CSF1 SERPINE1 TNFAIP2 CXCL1 CXCL3 AREG CXCL2 CX3CL1</i>                                                                                                                                                 |

|       |                                   |          |          |                 |                    |                                                                                                                                                                                                                                                            |
|-------|-----------------------------------|----------|----------|-----------------|--------------------|------------------------------------------------------------------------------------------------------------------------------------------------------------------------------------------------------------------------------------------------------------|
|       |                                   |          |          |                 |                    | <i>ICAM1 NPPB MMP25 FGF9 PLAU OLR1 LMCD1<br/> MBL2 IGFBP1 FGFBP1 SERPINB2 WNT5A<br/> RNASE2 TUBA4A BTC IL1B FAM20A HBEGF<br/> NXPH3 LAMA4 TGFA WNT6 TIFA APOF SLIT1<br/> WNT4 CCL22 PSAPL1 CCL20 WNT7B LGI3 APLN<br/> CXCL10 CXCL11 SAA1 LCN2 SAA2 KCP</i> |
| 33256 | I-kappaB/NF-kappaB complex        | 5.73E-06 | 1.97E-04 | 3/202<br>1.4%   | 4/17784<br>0.0%    | <i>NFKBIA BCL3 NFKB2</i>                                                                                                                                                                                                                                   |
| 9986  | cell surface                      | 8.30E-06 | 2.69E-04 | 15/202<br>7.4%  | 340/17784<br>1.9%  | <i>FGFBP1 CD83 TGFA TNFRSF11A AREG CX3CL1<br/> ICAM1 ROBO1 RGMA MMP25 PLAU IRAK2<br/> CRYAB HBEGF WNT4</i>                                                                                                                                                 |
| 33257 | Bcl3/NF-kappaB2 complex           | 1.28E-04 | 2.22E-03 | 2/202<br>0.9%   | 2/17784<br>0.0%    | <i>BCL3 NFKB2</i>                                                                                                                                                                                                                                          |
| 267   | cell fraction                     | 5.51E-04 | 6.83E-03 | 25/202<br>12.3% | 1079/17784<br>6.0% | <i>DOCK3 RGS16 SERPINE1 ITPR1 CXCL2 CLMP<br/> STX6 SLIT1 CYP1B1 OLR1 DUSP4 UGT1A1 LGI3<br/> WNT5A SAMD4A FOS SSTR2 BTC FOSL1 DHRS9<br/> SNPH CYP1A1 AHRR CRYAB VAMP2</i>                                                                                   |
| 19717 | synaptosome                       | 6.32E-04 | 7.56E-03 | 6/202<br>2.9%   | 92/17784<br>0.5%   | <i>FOSL1 SNPH LGI3 SAMD4A FOS VAMP2</i>                                                                                                                                                                                                                    |
| 5626  | insoluble fraction                | 1.23E-03 | 1.21E-02 | 20/202<br>9.9%  | 828/17784<br>4.6%  | <i>UGT1A1 RGS16 LGI3 WNT5A SAMD4A ITPR1 FOS<br/> SSTR2 FOSL1 CLMP DHRS9 SNPH CYP1A1 STX6<br/> SLIT1 CYP1B1 OLR1 AHRR CRYAB VAMP2</i>                                                                                                                       |
| 5624  | membrane fraction                 | 1.89E-03 | 1.66E-02 | 19/202<br>9.4%  | 797/17784<br>4.4%  | <i>UGT1A1 RGS16 LGI3 WNT5A SAMD4A ITPR1 FOS<br/> SSTR2 FOSL1 CLMP DHRS9 SNPH CYP1A1 STX6<br/> SLIT1 CYP1B1 OLR1 AHRR VAMP2</i>                                                                                                                             |
| 34364 | high-density lipoprotein particle | 2.76E-03 | 2.20E-02 | 3/202<br>1.4%   | 25/17784<br>0.1%   | <i>APOF SAA1 SAA2</i>                                                                                                                                                                                                                                      |

|       |                             |          |          |                 |                     |                                                                                                                                                                                                                                                                                                                                                                                                                           |
|-------|-----------------------------|----------|----------|-----------------|---------------------|---------------------------------------------------------------------------------------------------------------------------------------------------------------------------------------------------------------------------------------------------------------------------------------------------------------------------------------------------------------------------------------------------------------------------|
| 5886  | plasma membrane             | 3.37E-03 | 2.61E-02 | 59/202<br>29.2% | 3730/17784<br>20.9% | <i>OXTR CD83 CSF1 SERPINE1 ADRA1D SLC2A6<br/>CX3CL1 ICAM1 ROBO1 RND1 RAB43 MMP25<br/>SPRED1 PLAOU OLR1 PGM5 CCR6 SLC34A3 VAV3<br/>HS3ST3B1 FGFBP1 UNC13A UGT1A1 PCDHGA3<br/>PRKCE TESC GPR37L1 SSTR2 RGMA BTC<br/>SLC7A5 MRAS SYPL1 SNPH CDH11 TLR7<br/>ATP6V0D2 CRYAB SCN4B VAMP2 HBEGF ABCG2<br/>ITPR1 TGFA DAPP1 TNFRSF11A GNAI1 RASGRP3<br/>CLMP GJA10 STX6 SIPR3 KCNF1 TNFRSF9 LGI3<br/>SAMD4A GJB2 SLC4A9 CD200</i> |
| 44459 | plasma membrane part        | 3.40E-03 | 2.61E-02 | 36/202<br>17.8% | 1998/17784<br>11.2% | <i>OXTR CD83 ADRA1D TNFRSF11A GNAI1 ICAM1<br/>ROBO1 RASGRP3 RND1 MMP25 SPRED1 CLMP<br/>GJA10 OLR1 PGM5 SIPR3 CCR6 SLC34A3<br/>HS3ST3B1 KCNF1 UNC13A UGT1A1 TNFRSF9<br/>LGI3 SAMD4A SSTR2 SLC7A5 GJB2 SLC4A9<br/>SYPL1 SNPH ATP6V0D2 SCN4B CD200 VAMP2<br/>HBEGF</i>                                                                                                                                                       |
| 32994 | protein-lipid complex       | 7.23E-03 | 4.35E-02 | 3/202<br>1.4%   | 35/17784<br>0.1%    | <i>APOF SAA1 SAA2</i>                                                                                                                                                                                                                                                                                                                                                                                                     |
| 34358 | plasma lipoprotein particle | 7.23E-03 | 4.35E-02 | 3/202<br>1.4%   | 35/17784<br>0.1%    | <i>APOF SAA1 SAA2</i>                                                                                                                                                                                                                                                                                                                                                                                                     |

<sup>a</sup> *p*-value in hypergeometric test after correction

<sup>b</sup> The denominator represents the total number of genes with GO annotation and the numerator represents the number of genes belonging to each GO term

<sup>c</sup> The denominator represents the number of reference genes with GO annotation and the numerator represents the number of references genes annotated in the listed GO terms

**Table S7.** Gene ontology (GO) enrichment analysis of differentially expressed genes between Caco-2 cells stimulated with CotG-p75 and control ( $p < 0.00005$ ).

| GO ID                     | GO description                            | $p$ -value | Corrected $p$ -value <sup>a</sup> | Cluster frequency <sup>b</sup> | Total frequency <sup>c</sup> | Genes                                                                                                                                                                                                                                                                                                                                                          |
|---------------------------|-------------------------------------------|------------|-----------------------------------|--------------------------------|------------------------------|----------------------------------------------------------------------------------------------------------------------------------------------------------------------------------------------------------------------------------------------------------------------------------------------------------------------------------------------------------------|
| <b>Biological process</b> |                                           |            |                                   |                                |                              |                                                                                                                                                                                                                                                                                                                                                                |
| 42221                     | response to chemical stimulus             | 1.14E-16   | 3.21E-13                          | 50/164<br>30.4%                | 1466/17782<br>8.2%           | <i>CD83 CXCL8 SERPINE1 CXCL1 CXCL3 ETS1 CXCL2 CX3CL1 ROBO1 PLA2G4A CYP1B1 OLR1 MBL2 DUSP4 IGFBP1 UGT1A1 WNT5A PLA2G4A FOS WNT9A SSTR2 DUSP6 EREG ALDH1A3 IL1B AHRR AGXT ABCG2 PTAFR ITPR1 TNFRSF11A WNT6 IRAK2 UBD MBP UGT1A9 CCR10 WNT4 STAT5A EGR1 NOS2 CCL20 TGFB3 WNT7B FOSL1 NFKBIA CXCL10 CYP1A1 SAA1 SAA2</i>                                           |
| 9611                      | response to wounding                      | 2.98E-16   | 4.18E-13                          | 31/164<br>18.9%                | 544/17782<br>3.0%            | <i>SERPINA3 CXCL8 SERPINE1 PTAFR CXCL1 CXCL3 CXCL2 CX3CL1 MMP25 PLA2G4A IRAK2 TIFA OLR1 MBP MBL2 IGFBP1 SERPINB2 CCL20 TGFB3 PLA2G4B WNT5A GRHL3 FOS EREG CXCL10 IL1B CYP1A1 SAA1 AHRR SAA2 NFKBID</i>                                                                                                                                                         |
| 48518                     | positive regulation of biological process | 2.69E-14   | 2.51E-11                          | 58/164<br>35.3%                | 2211/17782<br>12.4%          | <i>CD83 CXCL8 CSF1 SERPINE1 SIX1 ADRA1D AREG ETS1 CX3CL1 ROBO1 FGF9 DPF1 LMCD1 PHLDA1 ICOSLG MBL2 VAV3 IGFBP1 MEF2C FGFBP1 PRKCE WNT5A PLA2G4A PROX1 FOS DUSP6 EREG ALDH1A3 IL1B IRF1 AHRR SOS1 TGFA TNFRSF11A RELB WNT6 IRAK2 UBD TIFA MBP DISC1 WNT4 STAT5A EGR1 NOS2 TGFB3 WNT7B TNFRSF9 SAMD4A FOXJ1 GRHL3 FOSL1 NFKBIA CXCL10 CYP1A1 SAA1 SAA2 NFKBID</i> |
| 48522                     | positive regulation of cellular process   | 1.66E-12   | 1.17E-09                          | 52/164<br>31.7%                | 2007/17782<br>11.2%          | <i>CD83 CSF1 SERPINE1 SIX1 ADRA1D AREG ETS1 CX3CL1 ROBO1 FGF9 DPF1 LMCD1 PHLDA1 ICOSLG MBL2 VAV3 IGFBP1 MEF2C FGFBP1 PRKCE WNT5A PLA2G4A PROX1 FOS DUSP6 EREG ALDH1A3 IL1B IRF1 AHRR SOS1 TGFA TNFRSF11A UBD TIFA MBP DISC1 WNT4 STAT5A EGR1 TGFB3 WNT7B TNFRSF9 SAMD4A GRHL3 FOSL1 NFKBIA CXCL10 CYP1A1 SAA1 SAA2 NFKBID</i>                                  |

|       |                                                |            |          |          |                 |                     |                                                                                                                                                                                                                                                                                                                                                                                                |
|-------|------------------------------------------------|------------|----------|----------|-----------------|---------------------|------------------------------------------------------------------------------------------------------------------------------------------------------------------------------------------------------------------------------------------------------------------------------------------------------------------------------------------------------------------------------------------------|
| 6952  | defense response                               |            | 3.02E-12 | 1.34E-09 | 28/164<br>17.0% | 621/17782<br>3.4%   | SERPINA3 CD83 CXCL8 SERPINE1 PTAFR CXCL1 CXCL3 CXCL2 CX3CL1 MMP25 IRAK2 UBD TIFA OLR1 MBP ICOSLG MBL2 NOS2 CCL20 PLA2G4B WNT5A FOS FOSL1 CXCL10 IL1B SAA1 SAA2 NFKBID                                                                                                                                                                                                                          |
| 42330 | taxis                                          |            | 3.60E-12 | 1.34E-09 | 16/164<br>9.7%  | 168/17782<br>0.9%   | CXCL8 CCL20 PTAFR CXCL1 TNFRSF11A CXCL3 CXCL2 CX3CL1 ROBO1 FOSL1 CXCL10 PLAU IL1B SAA1 SAA2 CCR10                                                                                                                                                                                                                                                                                              |
| 6935  | chemotaxis                                     |            | 3.60E-12 | 1.34E-09 | 16/164<br>9.7%  | 168/17782<br>0.9%   | CXCL8 CCL20 PTAFR CXCL1 TNFRSF11A CXCL3 CXCL2 CX3CL1 ROBO1 FOSL1 CXCL10 PLAU IL1B SAA1 SAA2 CCR10                                                                                                                                                                                                                                                                                              |
| 7275  | multicellular development                      | organismal | 6.48E-12 | 2.02E-09 | 64/164<br>39.0% | 2971/17782<br>16.7% | DYRK3 CXCL8 CSF1 SERPINE1 SIX1 CXCL1 ADRA1D CX3CL1 ROBO1 RND1 SPRED1 DNMT3L FGF9 PLAU GJA5 ZC3H12A DPF1 ADAMTS9 VAV3 IGFBP1 MEF2C UGT1A1 WNT5A HUNK PLA2G4A PROX1 FOS WNT9A TEX15 EREG SLC7A5 ALDH1A3 IL1B IRF1 CDH11 AHRR ITPR1 TNFRSF11A RELB WNT6 GBX2 UBD MBP NPTX1 DISC1 CCR10 WNT4 STAT5A EGR1 NOS2 TIPARP TGFB3 WNT7B CABLES1 FOXJ1 GRHL3 APLN CXCL10 RCAN1 DHRS9 MAFF CYP1A1 LHX4 SIM2 |
| 9605  | response to external stimulus                  |            | 7.20E-12 | 2.02E-09 | 26/164<br>15.8% | 551/17782<br>3.0%   | CXCL8 PTAFR CXCL1 TNFRSF11A CXCL3 CXCL2 CX3CL1 ROBO1 WNT6 PLAU CCR10 UGT1A1 CCL20 WNT7B WNT5A PLA2G4A FOS WNT9A SSTR2 FOSL1 CXCL10 IL1B CYP1A1 SAA1 AHRR SAA2                                                                                                                                                                                                                                  |
| 51239 | regulation of multicellular organismal process |            | 8.07E-12 | 2.06E-09 | 36/164<br>21.9% | 1068/17782<br>6.0%  | CD83 CSF1 SERPINE1 SIX1 TNFRSF11A ETS1 CX3CL1 ROBO1 WNT6 FGF9 PLAU MBP DISC1 LMCD1 WNT4 STAT5A EGR1 NOS2 TGFB3 WNT7B WNT5A PLA2G4A FOXJ1 PROX1 WNT9A SSTR2 EREG NFKBIA CXCL10 IL1B IRF1 TNNT3 MAFF SAA1 SAA2 NFKBID                                                                                                                                                                            |
| 32502 | developmental process                          |            | 9.32E-12 | 2.18E-09 | 67/164<br>40.8% | 3234/17782<br>18.1% | DYRK3 CXCL8 CSF1 SERPINE1 SIX1 CXCL1 ADRA1D CX3CL1 ROBO1 RND1 SPRED1 DNMT3L FGF9 PLAU GJA5 ZC3H12A DPF1 ADAMTS9 IER3 VAV3 IGFBP1 MEF2C                                                                                                                                                                                                                                                         |



|       |                       |          |          |                  |                     |                                                                                                                                                                                                                                                                                                                                                                                                                                                                                                                                                                                                                                                                                                                                |
|-------|-----------------------|----------|----------|------------------|---------------------|--------------------------------------------------------------------------------------------------------------------------------------------------------------------------------------------------------------------------------------------------------------------------------------------------------------------------------------------------------------------------------------------------------------------------------------------------------------------------------------------------------------------------------------------------------------------------------------------------------------------------------------------------------------------------------------------------------------------------------|
|       |                       |          |          |                  |                     | <i>TPRA1 UGT1A1 WNT5A HUNK PLA2G4A PROX1 FOS<br/>WNT9A TEX15 DUSP6 EREG SLC7A5 ALDH1A3 IL1B IRF1<br/>CDH11 AHRR ITPR1 TNFRSF11A RELB WNT6 GBX2 UBD<br/>MBP NPTX1 DISC1 CCR10 WNT4 STAT5A EGR1 NOS2<br/>TIPARP TGFB3 WNT7B CABLES1 FOXJ1 GRHL3 APLN<br/>CXCL10 RCAN1 DHRS9 MAFF CYP1A1 LHX4 SIM2</i>                                                                                                                                                                                                                                                                                                                                                                                                                            |
| 6954  | inflammatory response | 1.39E-11 | 2.99E-09 | 20/164<br>12.1%  | 317/17782<br>1.7%   | <i>SERPINA3 CXCL8 CCL20 PLA2G4B PTAFR CXCL1 FOS<br/>CXCL3 CXCL2 CXCL10 MMP25 IRAK2 IL1B TIFA SAA1<br/>OLR1 SAA2 MBP NFKBID MBL2</i>                                                                                                                                                                                                                                                                                                                                                                                                                                                                                                                                                                                            |
| 40011 | locomotion            | 1.63E-11 | 3.28E-09 | 23/164<br>14.0%  | 439/17782<br>2.4%   | <i>VAV3 CXCL8 CCL20 DNAH5 PTAFR SIX1 FOXJ1 CXCL1<br/>TNFRSF11A CXCL3 ETS1 CXCL2 CX3CL1 ROBO1 FOSL1<br/>CXCL10 GBX2 PLA2G4A IL1B SAA1 SAA2 DISC1 CCR10</i>                                                                                                                                                                                                                                                                                                                                                                                                                                                                                                                                                                      |
| 65007 | biological regulation | 2.54E-11 | 4.76E-09 | 106/164<br>64.6% | 6941/17782<br>39.0% | <i>CD83 CSF1 SERPINE1 TBC1D3C ABCA12 ETS1 FGF9 PLA2G4A<br/>DPF1 CYP1B1 ROS1 PHLDA1 ICOSLG IER3 IGFBP1 MEF2C<br/>ARL14 PRKCE WNT5A EREG ITPR1 TGFA TNFRSF11A<br/>RASGRP3 WNT6 IRAK2 UBD MBP SRGAP3 CCR10 WNT4<br/>STAT5A EGR1 TGFB3 TNFRSF9 FOSL1 NFKBIA CXCL10<br/>RCAN1 MAFF CYP1A1 LHX4 SIM2 NFKBID SERPINA3<br/>DYRK3 CXCL8 STON1 SIX1 TNFAIP3 CXCL1 ADRA1D AREG<br/>CX3CL1 ROBO1 RND1 SPRED1 DNMT3L LMCD1 MBL2<br/>DUSP4 VAV3 FGFBP1 SERPINB2 UGT1A1 PLA2G4B HUNK<br/>PLA2G4A PROX1 FOS WNT9A TEX15 SSTR2 DUSP6<br/>ALDH1A3 SNPH IL1B IRF1 TNNT3 AHRR NCOA7 SOS1<br/>BIRC3 PTAFR GNAI1 RELB GBX2 PALMD TIFA RGS22<br/>DISC1 UGT1A9 NOS2 CCL20 GAD1 WNT7B LGI3 CNBP<br/>SAMD4A CABLES1 FOXJ1 GRHL3 APLN DHRS9 SAA1 SAA2</i> |
| 2376  | immune system process | 2.96E-11 | 5.19E-09 | 33/164<br>20.1%  | 947/17782<br>5.3%   | <i>DYRK3 CD83 CXCL8 CSF1 PTAFR SIX1 CXCL1 TNFRSF11A<br/>CXCL3 ETS1 CXCL2 CX3CL1 RELB IRAK2 UBD MBP<br/>ICOSLG CCR10 MBL2 STAT5A EGR1 NOS2 TIPARP CCL20<br/>WNT5A FOXJ1 APLN NFKBIA CXCL10 IL1B IRF1 SAA1<br/>SAA2</i>                                                                                                                                                                                                                                                                                                                                                                                                                                                                                                          |
| 9617  | response to bacterium | 5.01E-11 | 7.81E-09 | 17/164           | 232/17782           | <i>UGT1A1 NOS2 CCL20 SERPINE1 PTAFR WNT5A PLA2G4A</i>                                                                                                                                                                                                                                                                                                                                                                                                                                                                                                                                                                                                                                                                          |

|       |                                          |            |          |          |                 |                                                                    |                                                                                                                                                                                                                                                                                                                                                                                                                                                                                   |
|-------|------------------------------------------|------------|----------|----------|-----------------|--------------------------------------------------------------------|-----------------------------------------------------------------------------------------------------------------------------------------------------------------------------------------------------------------------------------------------------------------------------------------------------------------------------------------------------------------------------------------------------------------------------------------------------------------------------------|
|       |                                          |            |          | 10.3%    | 1.3%            | <i>FOS TNFRSF11A NFKBIA CXCL10 IRAK2 IL1B CYP1A1 AHRR MBP MBL2</i> |                                                                                                                                                                                                                                                                                                                                                                                                                                                                                   |
| 48731 | system development                       |            | 5.71E-11 | 8.20E-09 | 55/164<br>33.5% | 2423/17782<br>13.6%                                                | <i>DYRK3 CXCL8 CSF1 SERPINE1 SIX1 CXCL1 CX3CL1 ROBO1 RND1 FGF9 PLAU GJA5 ZC3H12A DPF1 VAV3 IGFBP1 MEF2C UGT1A1 WNT5A PLA2G4A PROX1 FOS WNT9A TEX15 EREG SLC7A5 ALDH1A3 IRF1 CDH11 AHRR TNFRSF11A RELB WNT6 GBX2 UBD MBP NPTX1 DISC1 WNT4 STAT5A EGR1 NOS2 TIPARP TGFB3 WNT7B CABLES1 FOXJ1 GRHL3 APLN CXCL10 RCAN1 DHRS9 CYP1A1 LHX4 SIM2</i>                                                                                                                                     |
| 32496 | response to lipopolysaccharide           |            | 5.85E-11 | 8.20E-09 | 13/164<br>7.9%  | 117/17782<br>0.6%                                                  | <i>UGT1A1 SERPINE1 PTAFR WNT5A PLA2G4A FOS TNFRSF11A NFKBIA CXCL10 IRAK2 IL1B CYP1A1 AHRR</i>                                                                                                                                                                                                                                                                                                                                                                                     |
| 70887 | cellular response to chemical stimulus   |            | 1.35E-10 | 1.81E-08 | 21/164<br>12.8% | 401/17782<br>2.2%                                                  | <i>STAT5A IGFBP1 EGR1 CXCL8 UGT1A1 WNT7B SERPINE1 WNT5A FOS WNT9A TNFRSF11A CXCL3 CX3CL1 WNT6 IL1B CYP1A1 SAA1 AHRR SAA2 UGT1A9 WNT4</i>                                                                                                                                                                                                                                                                                                                                          |
| 2237  | response to molecule of bacterial origin |            | 1.83E-10 | 2.34E-08 | 13/164<br>7.9%  | 128/17782<br>0.7%                                                  | <i>UGT1A1 SERPINE1 PTAFR WNT5A PLA2G4A FOS TNFRSF11A NFKBIA CXCL10 IRAK2 IL1B CYP1A1 AHRR</i>                                                                                                                                                                                                                                                                                                                                                                                     |
| 32501 | multicellular process                    | organismal | 3.77E-10 | 4.61E-08 | 77/164<br>46.9% | 4376/17782<br>24.6%                                                | <i>SERPINA3 DYRK3 CXCL8 CSF1 SERPINE1 SIX1 CXCL1 ADRA1D CX3CL1 ROBO1 RND1 SPRED1 DNMT3L FGF9 PLAU GJA5 ZC3H12A DPF1 CYP1B1 OLR1 ROS1 ADAMTS9 VAV3 IGFBP1 MEF2C UGT1A1 WNT5A HUNK PLA2G4A PROX1 FOS WNT9A TEX15 SSTR2 EREG SLC7A5 ALDH1A3 SNPH IL1B IRF1 TNNT3 CDH11 AHRR BIRC3 PTAFR ITPR1 TNFRSF11A RELB WNT6 GBX2 UBD MBP NPTX1 DISC1 CCR10 WNT4 STAT5A EGR1 NOS2 TIPARP TGFB3 GAD1 WNT7B CABLES1 FOXJ1 GRHL3 APLN FOSL1 CXCL10 RCAN1 DHRS9 MAFF CYP1A1 SAA1 SAA2 LHX4 SIM2</i> |
| 48856 | anatomical development                   | structure  | 6.26E-10 | 7.33E-08 | 56/164<br>34.1% | 2657/17782<br>14.9%                                                | <i>DYRK3 CXCL8 CSF1 SERPINE1 SIX1 CXCL1 CX3CL1 ROBO1 RND1 FGF9 PLAU GJA5 ZC3H12A DPF1 IER3 VAV3 IGFBP1 MEF2C UGT1A1 WNT5A PLA2G4A PROX1 FOS WNT9A TEX15 EREG SLC7A5 ALDH1A3 IRF1 CDH11 AHRR</i>                                                                                                                                                                                                                                                                                   |

|       |                                  |          |          |                 |                     |                                                                                                                                                                                                                                                                                                                                                                                                                                                                                                                                                                                                                                                                                                                                                                                                       |
|-------|----------------------------------|----------|----------|-----------------|---------------------|-------------------------------------------------------------------------------------------------------------------------------------------------------------------------------------------------------------------------------------------------------------------------------------------------------------------------------------------------------------------------------------------------------------------------------------------------------------------------------------------------------------------------------------------------------------------------------------------------------------------------------------------------------------------------------------------------------------------------------------------------------------------------------------------------------|
|       |                                  |          |          |                 |                     | <p><i>TNFRSF11A RELB WNT6 GBX2 UBD MBP NPTX1 DISC1 WNT4 STAT5A EGR1 NOS2 TIPARP TGFB3 WNT7B CABLES1 FOXJ1 GRHL3 APLN CXCL10 RCAN1 DHRS9 CYP1A1 LHX4 SIM2</i></p> <p><i>CD83 CSF1 SERPINE1 TBC1D3C ETS1 FGF9 PLAU DPF1 ROS1 PHLDA1 ICOSLG IER3 IGFBP1 MEF2C ARL14 PRKCE WNT5A EREG ITPR1 TGFA TNFRSF11A RASGRP3 WNT6 IRAK2 UBD MBP SRGAP3 WNT4 STAT5A EGR1 TGFB3 TNFRSF9 FOSL1 NFKBIA CXCL10 RCAN1 MAFF CYP1A1 LHX4 SIM2 NFKBID SERPINA3 CXCL8 STON1 SIX1 TNFAIP3 CXCL1 ADRA1D AREG CX3CL1 ROBO1 RND1 SPRED1 DNMT3L LMCD1 MBL2 DUSP4 VAV3 FGFBP1 SERPINB2 UGT1A1 PLA2G4B HUNK PLA2G4A PROX1 FOS WNT9A TEX15 SSTR2 DUSP6 ALDH1A3 IL1B IRF1 TNNT3 AHRR NCOA7 SOS1 BIRC3 PTAFR GNAI1 RELB GBX2 PALMD TIFA RGS22 DISC1 UGT1A9 NOS2 CCL20 WNT7B LGI3 CNBP SAMD4A CABLES1 FOXJ1 GRHL3 APLN SAA1 SAA2</i></p> |
| 50789 | regulation of biological process | 7.14E-10 | 8.02E-08 | 99/164<br>60.3% | 6552/17782<br>36.8% | <p><i>CD83 CSF1 SERPINE1 TBC1D3C ETS1 FGF9 PLAU DPF1 ROS1 PHLDA1 ICOSLG IER3 IGFBP1 MEF2C ARL14 PRKCE WNT5A EREG ITPR1 TGFA TNFRSF11A RASGRP3 WNT6 IRAK2 UBD MBP SRGAP3 WNT4 STAT5A EGR1 TGFB3 TNFRSF9 FOSL1 NFKBIA CXCL10 RCAN1 MAFF CYP1A1 LHX4 SIM2 NFKBID SERPINA3 CXCL8 STON1 SIX1 TNFAIP3 CXCL1 ADRA1D AREG CX3CL1 ROBO1 RND1 SPRED1 DNMT3L LMCD1 MBL2 DUSP4 VAV3 FGFBP1 SERPINB2 UGT1A1 PLA2G4B HUNK PLA2G4A PROX1 FOS WNT9A TEX15 SSTR2 DUSP6 ALDH1A3 IL1B IRF1 TNNT3 AHRR NCOA7 SOS1 BIRC3 PTAFR GNAI1 RELB GBX2 PALMD TIFA RGS22 DISC1 UGT1A9 NOS2 CCL20 WNT7B LGI3 CNBP SAMD4A CABLES1 FOXJ1 GRHL3 APLN SAA1 SAA2</i></p>                                                                                                                                                                  |
| 42127 | regulation of cell proliferation | 8.72E-10 | 9.41E-08 | 29/164<br>17.6% | 848/17782<br>4.7%   | <p><i>CXCL8 CSF1 SERPINE1 TGFA CXCL1 ADRA1D TNFRSF11A ETS1 ROBO1 FGF9 PLAU DISC1 ICOSLG STAT5A FGFBP1 NOS2 TGFB3 TNFRSF9 WNT5A PLA2G4A FOXJ1 PROX1 WNT9A SSTR2 EREG FOSL1 NFKBIA CXCL10 IL1B</i></p>                                                                                                                                                                                                                                                                                                                                                                                                                                                                                                                                                                                                  |
| 50794 | regulation of cellular process   | 1.49E-09 | 1.54E-07 | 95/164<br>57.9% | 6222/17782<br>34.9% | <p><i>CD83 CXCL8 CSF1 SERPINE1 STON1 SIX1 TNFAIP3 TBC1D3C CXCL1 ADRA1D AREG ETS1 CX3CL1 ROBO1 RND1 SPRED1 FGF9 PLAU DPF1 LMCD1 ROS1 PHLDA1 ICOSLG IER3 MBL2 DUSP4 VAV3 IGFBP1 MEF2C FGFBP1 SERPINB2 ARL14 PRKCE PLA2G4B WNT5A HUNK PLA2G4A PROX1 FOS WNT9A TEX15 SSTR2 DUSP6 EREG ALDH1A3 IL1B IRF1 TNNT3 AHRR NCOA7 SOS1 BIRC3 PTAFR ITPR1 TGFA TNFRSF11A GNAI1 RELB RASGRP3 GBX2 PALMD IRAK2 UBD TIFA MBP SRGAP3 RGS22 DISC1 UGT1A9 WNT4 STAT5A EGR1 NOS2 CCL20 TGFB3 WNT7B TNFRSF9 LGI3 CNBP SAMD4A CABLES1 FOXJ1 GRHL3</i></p>                                                                                                                                                                                                                                                                    |

|       |                                              |          |          |                 |                     |                                                                                                                                                                                                                                                                                                     |
|-------|----------------------------------------------|----------|----------|-----------------|---------------------|-----------------------------------------------------------------------------------------------------------------------------------------------------------------------------------------------------------------------------------------------------------------------------------------------------|
|       |                                              |          |          |                 |                     | <i>APLN FOSL1 NFKBIA CXCL10 RCAN1 MAFF CYP1A1 SAA1 SAA2 LHX4 SIM2 NFKBID</i>                                                                                                                                                                                                                        |
| 48513 | organ development                            | 2.89E-09 | 2.80E-07 | 43/164<br>26.2% | 1793/17782<br>10.0% | <i>DYRK3 CXCL8 CSF1 SERPINE1 SIX1 TNFRSF11A CX3CL1 ROBO1 RELB WNT6 GBX2 FGF9 PLAUGJA5 UBD ZC3H12A WNT4 STAT5A VAV3 IGFBP1 EGR1 MEF2C UGT1A1 NOS2 TIPARP TGFB3 WNT7B WNT5A PLA2G4A GRHL3 PROX1 WNT9A TEX15 EREG APLN CXCL10 RCAN1 ALDH1A3 DHRS9 IRF1 CYP1A1 AHRR LHX4</i>                            |
| 23046 | signaling process                            | 2.99E-09 | 2.80E-07 | 48/164<br>29.2% | 2156/17782<br>12.1% | <i>CD83 CXCL8 PTAFR ITPR1 TGFA CXCL1 ADRA1D TNFRSF11A CX3CL1 GNAI1 RASGRP3 RND1 SPRED1 FGF9 PLAUIRAK2 TIFA MBP NPTX1 SRGAP3 ROS1 ICOSLG STAT5A DUSP4 VAV3 IGFBP1 FGFBP1 ARL14 NOS2 CCL20 TGFB3 PRKCE GAD1 PLA2G4B WNT5A HUNK FOS WNT9A SSTR2 DUSP6 EREG APLN NFKBIA CXCL10 RCAN1 SNPH IL1B SOS1</i> |
| 23060 | signal transmission                          | 2.99E-09 | 2.80E-07 | 48/164<br>29.2% | 2156/17782<br>12.1% | <i>CD83 CXCL8 PTAFR ITPR1 TGFA CXCL1 ADRA1D TNFRSF11A CX3CL1 GNAI1 RASGRP3 RND1 SPRED1 FGF9 PLAUIRAK2 TIFA MBP NPTX1 SRGAP3 ROS1 ICOSLG STAT5A DUSP4 VAV3 IGFBP1 FGFBP1 ARL14 NOS2 CCL20 TGFB3 PRKCE GAD1 PLA2G4B WNT5A HUNK FOS WNT9A SSTR2 DUSP6 EREG APLN NFKBIA CXCL10 RCAN1 SNPH IL1B SOS1</i> |
| 51094 | positive regulation of developmental process | 3.58E-09 | 3.16E-07 | 18/164<br>10.9% | 347/17782<br>1.9%   | <i>STAT5A CD83 CSF1 TGFB3 WNT7B SERPINE1 WNT5A SIX1 PLA2G4A PROX1 ETS1 CX3CL1 ROBO1 WNT6 FGF9 IL1B DISC1 WNT4</i>                                                                                                                                                                                   |
| 7165  | signal transduction                          | 3.60E-09 | 3.16E-07 | 44/164<br>26.8% | 1877/17782<br>10.5% | <i>CD83 CXCL8 PTAFR ITPR1 TGFA CXCL1 ADRA1D TNFRSF11A CX3CL1 GNAI1 RASGRP3 RND1 SPRED1 FGF9 PLAUIRAK2 TIFA SRGAP3 ROS1 ICOSLG STAT5A DUSP4 VAV3 IGFBP1 FGFBP1 ARL14 NOS2 CCL20 TGFB3 PRKCE PLA2G4B WNT5A HUNK FOS WNT9A SSTR2 DUSP6 EREG APLN NFKBIA CXCL10 RCAN1 IL1B SOS1</i>                     |

|       |                                                         |          |          |                 |                     |                                                                                                                                                                                         |
|-------|---------------------------------------------------------|----------|----------|-----------------|---------------------|-----------------------------------------------------------------------------------------------------------------------------------------------------------------------------------------|
| 50793 | regulation of developmental process                     | 3.76E-09 | 3.20E-07 | 27/164<br>16.4% | 791/17782<br>4.4%   | <i>CD83 CSF1 SERPINE1 SIX1 ETS1 CX3CL1 ROBO1 WNT6 FGF9 PALMD MBP DISC1 WNT4 STAT5A TGFB3 WNT7B WNT5A PLA2G4A FOXJ1 PROX1 WNT9A EREG NFKBIA CXCL10 IL1B MAFF NFKBID</i>                  |
| 42981 | regulation of apoptosis                                 | 4.27E-09 | 3.53E-07 | 28/164<br>17.0% | 852/17782<br>4.7%   | <i>SERPINE1 SIX1 TNFAIP3 ETS1 CX3CL1 ROBO1 UBD DPF1 PHLDA1 IER3 STAT5A VAV3 MEF2C SERPINB2 TGFB3 PRKCE TNFRSF9 WNT5A PLA2G4A DUSP6 FOSL1 NFKBIA ALDH1A3 IL1B LHX4 SOS1 NFKBID BIRC3</i> |
| 7626  | locomotory behavior                                     | 4.70E-09 | 3.77E-07 | 16/164<br>9.7%  | 272/17782<br>1.5%   | <i>CXCL8 CCL20 PTAFR CXCL1 TNFRSF11A CXCL3 CXCL2 CX3CL1 ROBO1 FOSL1 CXCL10 PLA2G4A IL1B SAA1 SAA2 CCR10</i>                                                                             |
| 43067 | regulation of programmed cell death                     | 5.24E-09 | 4.09E-07 | 28/164<br>17.0% | 860/17782<br>4.8%   | <i>SERPINE1 SIX1 TNFAIP3 ETS1 CX3CL1 ROBO1 UBD DPF1 PHLDA1 IER3 STAT5A VAV3 MEF2C SERPINB2 TGFB3 PRKCE TNFRSF9 WNT5A PLA2G4A DUSP6 FOSL1 NFKBIA ALDH1A3 IL1B LHX4 SOS1 NFKBID BIRC3</i> |
| 51707 | response to other organism                              | 5.83E-09 | 4.42E-07 | 18/164<br>10.9% | 358/17782<br>2.0%   | <i>UGT1A1 NOS2 CCL20 SERPINE1 PTAFR WNT5A PLA2G4A FOS TNFRSF11A FOSL1 NFKBIA CXCL10 IRAK2 IL1B CYP1A1 AHRR MBP MBL2</i>                                                                 |
| 10941 | regulation of cell death                                | 6.25E-09 | 4.62E-07 | 28/164<br>17.0% | 867/17782<br>4.8%   | <i>SERPINE1 SIX1 TNFAIP3 ETS1 CX3CL1 ROBO1 UBD DPF1 PHLDA1 IER3 STAT5A VAV3 MEF2C SERPINB2 TGFB3 PRKCE TNFRSF9 WNT5A PLA2G4A DUSP6 FOSL1 NFKBIA ALDH1A3 IL1B LHX4 SOS1 NFKBID BIRC3</i> |
| 51240 | positive regulation of multicellular organismal process | 6.75E-09 | 4.86E-07 | 16/164<br>9.7%  | 279/17782<br>1.5%   | <i>STAT5A CD83 CSF1 TGFB3 SERPINE1 WNT5A PLA2G4A TNFRSF11A CX3CL1 EREG WNT6 FGF9 IL1B SAA1 SAA2 WNT4</i>                                                                                |
| 42573 | retinoic acid metabolic process                         | 9.51E-09 | 6.67E-07 | 6/164 3.6%      | 18/17782<br>0.1%    | <i>ALDH1A3 DHRS9 UGT1A1 CYP1A1 AHRR UGT1A9</i>                                                                                                                                          |
| 48519 | negative regulation of biological process               | 1.11E-08 | 7.63E-07 | 45/164<br>27.4% | 2021/17782<br>11.3% | <i>CD83 CXCL8 SERPINE1 SIX1 TNFAIP3 CXCL1 ETS1 CX3CL1 ROBO1 RND1 FGF9 PLA2G4A UBD MBP RGS22 UGT1A9 LMCD1 ROS1 IER3 WNT4 MBL2 STAT5A EGR1</i>                                            |

|       |                                             |          |          |                 |                     |                                                                                                                                                                                                                                                                                                                                                                                |
|-------|---------------------------------------------|----------|----------|-----------------|---------------------|--------------------------------------------------------------------------------------------------------------------------------------------------------------------------------------------------------------------------------------------------------------------------------------------------------------------------------------------------------------------------------|
|       |                                             |          |          |                 |                     | MEF2C FGFBP1 SERPINB2 UGT1A1 TGFB3 TNFRSF9<br>WNT5A FOXJ1 PROX1 WNT9A SSTR2 DUSP6 EREG FOSL1<br>NFKBIA CXCL10 IL1B SAA1 SAA2 LHX4 NFKBID BIRC3                                                                                                                                                                                                                                 |
| 23052 | signaling                                   | 1.28E-08 | 8.36E-07 | 59/164<br>35.9% | 3127/17782<br>17.5% | CD83 CXCL8 SIX1 CXCL1 ADRA1D AREG CX3CL1 ROBO1<br>RND1 SPRED1 FGF9 PLA2G4A ROS1 ICOSLG DUSP4<br>VAV3 IGFBP1 FGFBP1 ARL14 PRKCE PLA2G4B WNT5A<br>HUNK FOS WNT9A SSTR2 DUSP6 EREG SNPH IL1B SOS1<br>BIRC3 NXPH3 PTAFR ITPR1 TGFA TNFRSF11A GNAI1<br>RASGRP3 WNT6 IRAK2 TIFA MBP NPTX1 SRGAP3 CCR10<br>WNT4 STAT5A NOS2 TIPARP CCL20 TGFB3 GAD1 WNT7B<br>APLN NFKBIA CXCL10 RCAN1 |
| 30593 | neutrophil chemotaxis                       | 1.38E-08 | 8.80E-07 | 6/164 3.6%      | 19/17782<br>0.1%    | CXCL8 IL1B SAA1 SAA2 CXCL3 CX3CL1                                                                                                                                                                                                                                                                                                                                              |
| 48583 | regulation of response to stimulus          | 1.72E-08 | 1.07E-06 | 21/164<br>12.8% | 526/17782<br>2.9%   | STAT5A CXCL8 NOS2 SERPINE1 WNT5A PLA2G4A FOXJ1<br>TEX15 TNFRSF11A CX3CL1 EREG ROBO1 NFKBIA CXCL10<br>PLAU IRAK2 IL1B SAA1 SAA2 MBP MBL2                                                                                                                                                                                                                                        |
| 6950  | response to stress                          | 2.21E-08 | 1.35E-06 | 41/164<br>25.0% | 1775/17782<br>9.9%  | SERPINA3 CD83 CXCL8 SERPINE1 PTAFR ITPR1 CXCL1<br>CXCL3 CXCL2 CX3CL1 MMP25 PLA2G4A IRAK2 UBD TIFA<br>OLR1 MBP ICOSLG MBL2 IGFBP1 SERPINB2 UGT1A1<br>NOS2 CCL20 TGFB3 PLA2G4B WNT5A PLA2G4A GRHL3<br>FOS DUSP6 EREG FOSL1 CXCL10 IL1B MAFF CYP1A1<br>SAA1 AHRR SAA2 NFKBID                                                                                                      |
| 32101 | regulation of response to external stimulus | 2.66E-08 | 1.59E-06 | 13/164<br>7.9%  | 192/17782<br>1.0%   | STAT5A CXCL8 SERPINE1 WNT5A PLA2G4A TNFRSF11A<br>CX3CL1 ROBO1 CXCL10 PLA2G4A IL1B SAA1 SAA2                                                                                                                                                                                                                                                                                    |
| 9812  | flavonoid metabolic process                 | 2.77E-08 | 1.62E-06 | 5/164 3.0%      | 11/17782<br>0.0%    | UGT1A10 UGT1A1 CYP1A1 AHRR UGT1A9                                                                                                                                                                                                                                                                                                                                              |
| 9966  | regulation of signal transduction           | 4.39E-08 | 2.51E-06 | 25/164<br>15.2% | 773/17782<br>4.3%   | CSF1 SERPINE1 TGFA TNFAIP3 TBC1D3C TNFRSF11A<br>ROBO1 RASGRP3 SPRED1 FGF9 PLA2G4A IRAK2 UBD TIFA<br>RGS22 LMCD1 VAV3 TGFB3 WNT5A FOXJ1 DUSP6 EREG<br>IL1B SOS1 NFKBID                                                                                                                                                                                                          |

|       |                                                      |          |          |                 |                     |                                                                                                                                                                                                                                                                                 |
|-------|------------------------------------------------------|----------|----------|-----------------|---------------------|---------------------------------------------------------------------------------------------------------------------------------------------------------------------------------------------------------------------------------------------------------------------------------|
| 23051 | regulation of signaling process                      | 4.97E-08 | 2.79E-06 | 25/164<br>15.2% | 778/17782<br>4.3%   | <i>CSF1 SERPINE1 TGFA TNFAIP3 TBC1D3C TNFRSF11A ROBO1 RASGRP3 SPRED1 FGF9 PLA1 IRAK2 UBD TIFA RGS22 LMCD1 VAV3 TGFB3 WNT5A FOXJ1 DUSP6 EREG IL1B SOS1 NFKBID</i>                                                                                                                |
| 7166  | cell surface receptor linked signaling pathway       | 5.53E-08 | 3.04E-06 | 33/164<br>20.1% | 1278/17782<br>7.1%  | <i>CXCL8 NXPH3 PTAFR CXCL1 ADRA1D TNFRSF11A AREG CX3CL1 GNAI1 ROBO1 WNT6 FGF9 IRAK2 ROS1 CCR10 WNT4 STAT5A VAV3 IGFBP1 NOS2 TIPARP TGFB3 WNT7B WNT5A FOS WNT9A SSTR2 EREG NFKBIA CXCL10 IL1B SOS1 BIRC3</i>                                                                     |
| 10646 | regulation of cell communication                     | 6.25E-08 | 3.37E-06 | 31/164<br>18.9% | 1154/17782<br>6.4%  | <i>CSF1 SERPINE1 TGFA TNFAIP3 TBC1D3C TNFRSF11A ROBO1 RASGRP3 SPRED1 FGF9 PLA1 IRAK2 UBD TIFA RGS22 DISC1 LMCD1 WNT4 VAV3 EGR1 FGFBP1 NOS2 TGFB3 WNT5A FOXJ1 DUSP6 EREG NFKBIA IL1B SOS1 NFKBID</i>                                                                             |
| 31349 | positive regulation of defense response              | 7.10E-08 | 3.76E-06 | 9/164 5.4%      | 83/17782<br>0.4%    | <i>STAT5A NFKBIA IRAK2 IL1B SERPINE1 PLA2G4A TNFRSF11A CX3CL1 EREG</i>                                                                                                                                                                                                          |
| 9698  | phenylpropanoid metabolic process                    | 7.61E-08 | 3.96E-06 | 5/164 3.0%      | 13/17782<br>0.0%    | <i>UGT1A10 UGT1A1 CYP1A1 AHRR UGT1A9</i>                                                                                                                                                                                                                                        |
| 19748 | secondary metabolic process                          | 9.77E-08 | 4.99E-06 | 8/164 4.8%      | 62/17782<br>0.3%    | <i>UGT1A10 ALDH1A3 DHRS9 UGT1A1 CYP1A1 CYP1B1 AHRR UGT1A9</i>                                                                                                                                                                                                                   |
| 23033 | signaling pathway                                    | 1.00E-07 | 5.02E-06 | 44/164<br>26.8% | 2098/17782<br>11.7% | <i>CXCL8 NXPH3 PTAFR TGFA CXCL1 ADRA1D TNFRSF11A AREG CX3CL1 GNAI1 ROBO1 RASGRP3 RND1 WNT6 SPRED1 FGF9 IRAK2 TIFA ROS1 CCR10 WNT4 STAT5A DUSP4 VAV3 IGFBP1 ARL14 NOS2 TIPARP TGFB3 PRKCE WNT7B PLA2G4B WNT5A FOS WNT9A SSTR2 DUSP6 EREG NFKBIA CXCL10 RCAN1 IL1B SOS1 BIRC3</i> |
| 30879 | mammary gland development                            | 1.07E-07 | 5.12E-06 | 9/164 5.4%      | 87/17782<br>0.4%    | <i>STAT5A CSF1 TGFB3 WNT7B WNT5A TNFRSF11A ROBO1 WNT4 APLN</i>                                                                                                                                                                                                                  |
| 32103 | positive regulation of response to external stimulus | 1.07E-07 | 5.12E-06 | 9/164 5.4%      | 87/17782<br>0.4%    | <i>STAT5A CXCL10 CXCL8 IL1B SERPINE1 WNT5A PLA2G4A TNFRSF11A CX3CL1</i>                                                                                                                                                                                                         |

|       |                                              |          |          |                 |                   |                                                                                                                                                                         |
|-------|----------------------------------------------|----------|----------|-----------------|-------------------|-------------------------------------------------------------------------------------------------------------------------------------------------------------------------|
| 10033 | response to organic substance                | 1.10E-07 | 5.12E-06 | 26/164<br>15.8% | 870/17782<br>4.8% | <i>CD83 SERPINE1 PTAFR TNFRSF11A IRAK2 UBD CYP1B1 WNT4 STAT5A DUSP4 IGFBP1 EGR1 UGT1A1 TGFB3 WNT5A PLA2G4A FOS DUSP6 EREG FOSL1 NFKBIA CXCL10 IL1B CYP1A1 AHRR AGXT</i> |
| 50900 | leukocyte migration                          | 1.11E-07 | 5.12E-06 | 8/164 4.8%      | 63/17782<br>0.3%  | <i>CXCL8 IL1B SAA1 SAA2 FOXJ1 TNFRSF11A CXCL3 CX3CL1</i>                                                                                                                |
| 7267  | cell-cell signaling                          | 1.11E-07 | 5.12E-06 | 21/164<br>12.8% | 587/17782<br>3.3% | <i>FGFBP1 CCL20 GAD1 WNT7B SIX1 ADRA1D WNT9A TNFRSF11A SSTR2 AREG EREG WNT6 CXCL10 FGF9 SNPH GJA5 IL1B TIFA MBP NPTX1 WNT4</i>                                          |
| 30595 | leukocyte chemotaxis                         | 1.22E-07 | 5.51E-06 | 7/164 4.2%      | 43/17782<br>0.2%  | <i>CXCL8 IL1B SAA1 SAA2 TNFRSF11A CXCL3 CX3CL1</i>                                                                                                                      |
| 48514 | blood vessel morphogenesis                   | 1.32E-07 | 5.88E-06 | 13/164<br>7.9%  | 220/17782<br>1.2% | <i>VAV3 CXCL8 NOS2 TIPARP WNT7B PROX1 CX3CL1 EREG ROBO1 GBX2 FGF9 PLA2G4A ZC3H12A</i>                                                                                   |
| 30155 | regulation of cell adhesion                  | 1.35E-07 | 5.93E-06 | 11/164<br>6.7%  | 149/17782<br>0.8% | <i>STAT5A VAV3 CXCL8 CSF1 PLA2G4A IL1B SERPINE1 SAA1 SAA2 CX3CL1 RND1</i>                                                                                               |
| 1568  | blood vessel development                     | 1.71E-07 | 7.25E-06 | 14/164<br>8.5%  | 265/17782<br>1.4% | <i>VAV3 CXCL8 NOS2 TIPARP WNT7B PROX1 CX3CL1 EREG ROBO1 GBX2 FGF9 PLA2G4A ZC3H12A</i>                                                                                   |
| 9607  | response to biotic stimulus                  | 1.77E-07 | 7.37E-06 | 18/164<br>10.9% | 448/17782<br>2.5% | <i>UGT1A1 NOS2 CCL20 SERPINE1 PTAFR WNT5A PLA2G4A FOS TNFRSF11A FOSL1 NFKBIA CXCL10 IRAK2 IL1B CYP1A1 AHRR MBP MBL2</i>                                                 |
| 2684  | positive regulation of immune system process | 1.79E-07 | 7.37E-06 | 14/164<br>8.5%  | 266/17782<br>1.4% | <i>STAT5A CD83 NOS2 SERPINE1 WNT5A FOXJ1 EREG NFKBIA CXCL10 IRAK2 IL1B MBP ICOSLG MBL2</i>                                                                              |
| 34754 | cellular hormone metabolic process           | 1.81E-07 | 7.37E-06 | 8/164 4.8%      | 67/17782<br>0.3%  | <i>ALDH1A3 DHRS9 UGT1A1 CYP1A1 CYP1B1 AHRR UGT1A9 WNT4</i>                                                                                                              |
| 45595 | regulation of cell differentiation           | 1.93E-07 | 7.72E-06 | 20/164<br>12.1% | 553/17782<br>3.1% | <i>STAT5A CD83 CSF1 TGFB3 WNT7B WNT5A SIX1 FOXJ1 PROX1 WNT9A ETS1 EREG ROBO1 NFKBIA FGF9 MAFF MBP DISC1 NFKBID WNT4</i>                                                 |
| 48584 | positive regulation of response              | 2.05E-07 | 8.00E-06 | 14/164          | 269/17782         | <i>STAT5A CXCL8 SERPINE1 WNT5A PLA2G4A TNFRSF11A</i>                                                                                                                    |



|       |                             |          |          |                 |                     |                                                                                                                                                                                                                                                                                                                                                                                                                                 |
|-------|-----------------------------|----------|----------|-----------------|---------------------|---------------------------------------------------------------------------------------------------------------------------------------------------------------------------------------------------------------------------------------------------------------------------------------------------------------------------------------------------------------------------------------------------------------------------------|
|       | to stimulus                 |          |          | 8.5%            | 1.5%                | <i>CX3CL1 EREG NFKBIA CXCL10 IRAK2 IL1B MBP MBL2</i>                                                                                                                                                                                                                                                                                                                                                                            |
| 50896 | response to stimulus        | 2.05E-07 | 8.00E-06 | 62/164<br>37.8% | 3632/17782<br>20.4% | <i>SERPINA3 CD83 CXCL8 SERPINE1 CXCL1 CXCL3 ETSI<br/>CXCL2 CX3CL1 ROBO1 MMP25 PLAU CYP1B1 OLR1<br/>ICOSLG MBL2 DUSP4 IGFBP1 SERPINB2 UGT1A1<br/>PLA2G4B WNT5A PLA2G4A FOS WNT9A SSTR2 DUSP6<br/>EREG ALDH1A3 IL1B AHRR AGXT ABCG2 PTAFR ITPR1<br/>TNFRSF11A RELB WNT6 IRAK2 UBD TIFA MBP UGT1A9<br/>CCR10 WNT4 STAT5A EGR1 NOS2 CCL20 TGFB3 WNT7B<br/>FOXJ1 GRHL3 APLN FOSL1 NFKBIA CXCL10 MAFF<br/>CYP1A1 SAA1 SAA2 NFKBID</i> |
| 51674 | localization of cell        | 2.34E-07 | 8.75E-06 | 15/164<br>9.1%  | 315/17782<br>1.7%   | <i>VAV3 CXCL8 DNAH5 SIX1 FOXJ1 TNFRSF11A CXCL3 ETSI<br/>CX3CL1 ROBO1 GBX2 IL1B SAA1 SAA2 DISC1</i>                                                                                                                                                                                                                                                                                                                              |
| 48870 | cell motility               | 2.34E-07 | 8.75E-06 | 15/164<br>9.1%  | 315/17782<br>1.7%   | <i>VAV3 CXCL8 DNAH5 SIX1 FOXJ1 TNFRSF11A CXCL3 ETSI<br/>CX3CL1 ROBO1 GBX2 IL1B SAA1 SAA2 DISC1</i>                                                                                                                                                                                                                                                                                                                              |
| 51704 | multi-organism process      | 2.43E-07 | 8.94E-06 | 24/164<br>14.6% | 786/17782<br>4.4%   | <i>STAT5A UGT1A1 NOS2 CCL20 TGFB3 PLA2G4B SERPINE1<br/>PTAFR WNT5A PLA2G4A FOS TNFRSF11A FOSL1 NFKBIA<br/>CXCL10 PLAU IRAK2 IL1B MAFF CYP1A1 AHRR MBP<br/>WNT4 MBL2</i>                                                                                                                                                                                                                                                         |
| 1944  | vasculature development     | 2.45E-07 | 8.94E-06 | 14/164<br>8.5%  | 273/17782<br>1.5%   | <i>VAV3 CXCL8 NOS2 TIPARP WNT7B PROX1 CX3CL1 EREG<br/>ROBO1 GBX2 FGF9 PLAU GJA5 ZC3H12A</i>                                                                                                                                                                                                                                                                                                                                     |
| 6955  | immune response             | 2.55E-07 | 9.17E-06 | 21/164<br>12.8% | 617/17782<br>3.4%   | <i>CD83 CXCL8 NOS2 CCL20 PTAFR WNT5A FOXJ1 CXCL1<br/>TNFRSF11A CXCL3 ETSI CXCL2 CX3CL1 RELB APLN<br/>CXCL10 IL1B UBD MBP CCR10 MBL2</i>                                                                                                                                                                                                                                                                                         |
| 60326 | cell chemotaxis             | 2.67E-07 | 9.50E-06 | 7/164 4.2%      | 48/17782<br>0.2%    | <i>CXCL8 IL1B SAA1 SAA2 TNFRSF11A CXCL3 CX3CL1</i>                                                                                                                                                                                                                                                                                                                                                                              |
| 1523  | retinoid metabolic process  | 2.78E-07 | 9.50E-06 | 6/164 3.6%      | 30/17782<br>0.1%    | <i>ALDH1A3 DHRS9 UGT1A1 CYP1A1 AHRR UGT1A9</i>                                                                                                                                                                                                                                                                                                                                                                                  |
| 6776  | vitamin A metabolic process | 2.78E-07 | 9.50E-06 | 6/164 3.6%      | 30/17782<br>0.1%    | <i>ALDH1A3 DHRS9 UGT1A1 CYP1A1 AHRR UGT1A9</i>                                                                                                                                                                                                                                                                                                                                                                                  |

|       |                                     |          |          |                 |                   |                                                                                                                                                   |
|-------|-------------------------------------|----------|----------|-----------------|-------------------|---------------------------------------------------------------------------------------------------------------------------------------------------|
| 16101 | diterpenoid metabolic process       | 2.78E-07 | 9.50E-06 | 6/164 3.6%      | 30/17782<br>0.1%  | <i>ALDH1A3 DHRS9 UGT1A1 CYP1A1 AHRR UGT1A9</i>                                                                                                    |
| 45787 | positive regulation of cell cycle   | 2.87E-07 | 9.69E-06 | 8/164 4.8%      | 71/17782<br>0.3%  | <i>STAT5A FOSL1 IL1B CYP1A1 TGFA AHRR PROX1 EREG</i>                                                                                              |
| 7610  | behavior                            | 3.07E-07 | 1.02E-05 | 18/164<br>10.9% | 465/17782<br>2.6% | <i>EGR1 CXCL8 CCL20 PTAFR CXCL1 FOS TNFRSF11A CXCL3 CXCL2 CX3CL1 ROBO1 FOSL1 CXCL10 PLAUI IL1B SAA1 SAA2 CCR10</i>                                |
| 31347 | regulation of defense response      | 3.16E-07 | 1.04E-05 | 11/164<br>6.7%  | 162/17782<br>0.9% | <i>STAT5A NFKBIA IRAK2 IL1B SERPINE1 SAA1 SAA2 PLA2G4A TNFRSF11A CX3CL1 EREG</i>                                                                  |
| 42060 | wound healing                       | 3.46E-07 | 1.13E-05 | 12/164<br>7.3%  | 200/17782<br>1.1% | <i>IGFBP1 SERPINB2 PLAUI TGFB3 IL1B SERPINE1 WNT5A SAA1 SAA2 GRHL3 CX3CL1 EREG</i>                                                                |
| 22414 | reproductive process                | 4.01E-07 | 1.28E-05 | 24/164<br>14.6% | 808/17782<br>4.5% | <i>STAT5A CSF1 NOS2 TGFB3 PLA2G4B WNT5A PLA2G4A FOXJ1 FOS TEX15 EREG APLN FOSL1 DNMT3L FGF9 PLAUI IL1B MAFF CYP1A1 AHRR DISC1 ROS1 WNT4 BIRC3</i> |
| 2682  | regulation of immune system process | 4.23E-07 | 1.33E-05 | 17/164<br>10.3% | 425/17782<br>2.3% | <i>STAT5A CD83 CSF1 NOS2 SERPINE1 WNT5A FOXJ1 ETS1 EREG NFKBIA CXCL10 IRAK2 IL1B MBP NFKBID ICOSLG MBL2</i>                                       |
| 3     | reproduction                        | 4.28E-07 | 1.34E-05 | 24/164<br>14.6% | 811/17782<br>4.5% | <i>STAT5A CSF1 NOS2 TGFB3 PLA2G4B WNT5A PLA2G4A FOXJ1 FOS TEX15 EREG APLN FOSL1 DNMT3L FGF9 PLAUI IL1B MAFF CYP1A1 AHRR DISC1 ROS1 WNT4 BIRC3</i> |
| 7154  | cell communication                  | 4.38E-07 | 1.35E-05 | 24/164<br>14.6% | 812/17782<br>4.5% | <i>FGFBP1 CCL20 GAD1 WNT7B WNT5A SIX1 ADRA1D FOS WNT9A TNFRSF11A SSTR2 AREG EREG FOSL1 WNT6 CXCL10 FGF9 SNPH GJA5 IL1B TIFA MBP NPTX1 WNT4</i>    |
| 33273 | response to vitamin                 | 4.64E-07 | 1.41E-05 | 9/164 5.4%      | 103/17782<br>0.5% | <i>WNT6 CXCL10 IL1B WNT7B WNT5A CYP1A1 AHRR PLA2G4A WNT9A</i>                                                                                     |
| 7584  | response to nutrient                | 4.83E-07 | 1.44E-05 | 11/164<br>6.7%  | 169/17782<br>0.9% | <i>WNT6 CXCL10 UGT1A1 IL1B WNT7B WNT5A CYP1A1 AHRR PLA2G4A WNT9A SSTR2</i>                                                                        |
| 35556 | intracellular signal transduction   | 6.92E-07 | 2.02E-05 | 24/164          | 833/17782         | <i>STAT5A DUSP4 VAV3 CXCL8 ARL14 NOS2 TGFB3 PLA2G4B</i>                                                                                           |

|       |                                                            |          |          |                 |                    |       |      |                                                                                                                                                                                                                               |
|-------|------------------------------------------------------------|----------|----------|-----------------|--------------------|-------|------|-------------------------------------------------------------------------------------------------------------------------------------------------------------------------------------------------------------------------------|
|       |                                                            |          |          |                 |                    | 14.6% | 4.6% | <i>PTAFR WNT5A TGFA ADRA1D SSTR2 DUSP6 GNAI1 RASGRP3 RND1 NFKBIA RCAN1 SPRED1 IRAK2 IL1B TIFA SOS1</i>                                                                                                                        |
| 9991  | response to extracellular stimulus                         | 1.10E-06 | 3.20E-05 | 13/164<br>7.9%  | 265/17782<br>1.4%  |       |      | <i>UGT1A1 WNT7B WNT5A PLA2G4A FOS WNT9A SSTR2 FOSL1 WNT6 CXCL10 IL1B CYP1A1 AHRR</i>                                                                                                                                          |
| 7223  | Wnt receptor signaling pathway, calcium modulating pathway | 1.13E-06 | 3.25E-05 | 5/164 3.0%      | 21/17782<br>0.1%   |       |      | <i>WNT6 WNT7B WNT5A WNT9A WNT4</i>                                                                                                                                                                                            |
| 6721  | terpenoid metabolic process                                | 1.21E-06 | 3.44E-05 | 6/164 3.6%      | 38/17782<br>0.2%   |       |      | <i>ALDH1A3 DHRS9 UGT1A1 CYP1A1 AHRR UGT1A9</i>                                                                                                                                                                                |
| 65008 | regulation of biological quality                           | 1.41E-06 | 3.94E-05 | 34/164<br>20.7% | 1544/17782<br>8.6% |       |      | <i>SERPINA3 DYRK3 CSF1 SERPINE1 ITPR1 TNFRSF11A ABCA12 PALMD PLA2G4A CYP1B1 MBP UGT1A9 CCR10 WNT4 MBL2 STAT5A IGFBP1 EGR1 UGT1A1 NOS2 TGFB3 GAD1 WNT7B PLA2G4A TEX15 NFKBIA ALDH1A3 DHRS9 SNPH IL1B CYP1A1 SAA1 AHRR SAA2</i> |
| 35567 | non-canonical Wnt receptor signaling pathway               | 1.46E-06 | 4.05E-05 | 5/164 3.0%      | 22/17782<br>0.1%   |       |      | <i>WNT6 WNT7B WNT5A WNT9A WNT4</i>                                                                                                                                                                                            |
| 80134 | regulation of response to stress                           | 1.64E-06 | 4.44E-05 | 14/164<br>8.5%  | 320/17782<br>1.7%  |       |      | <i>STAT5A SERPINE1 WNT5A PLA2G4A TEX15 TNFRSF11A CX3CL1 EREG NFKBIA PLA2G4A IRAK2 IL1B SAA1 SAA2</i>                                                                                                                          |
| 35466 | regulation of signaling pathway                            | 1.65E-06 | 4.44E-05 | 26/164<br>15.8% | 1003/17782<br>5.6% |       |      | <i>CSF1 TGFA TNFAIP3 TBC1D3C TNFRSF11A ROBO1 RASGRP3 SPRED1 FGF9 IRAK2 UBD TIFA DISC1 LMCD1 WNT4 VAV3 FGFBP1 TGFB3 WNT5A FOXJ1 DUSP6 EREG NFKBIA IL1B SOS1 NFKBID</i>                                                         |
| 6775  | fat-soluble vitamin metabolic process                      | 1.66E-06 | 4.44E-05 | 6/164 3.6%      | 40/17782<br>0.2%   |       |      | <i>ALDH1A3 DHRS9 UGT1A1 CYP1A1 AHRR UGT1A9</i>                                                                                                                                                                                |
| 6953  | acute-phase response                                       | 1.66E-06 | 4.44E-05 | 6/164 3.6%      | 40/17782<br>0.2%   |       |      | <i>SERPINA3 TIFA SAA1 SAA2 MBP MBL2</i>                                                                                                                                                                                       |
| 48732 | gland development                                          | 1.80E-06 | 4.75E-05 | 11/164<br>6.7%  | 193/17782<br>1.0%  |       |      | <i>STAT5A ALDH1A3 CSF1 TGFB3 WNT7B WNT5A SIX1 TNFRSF11A ROBO1 WNT4 APLN</i>                                                                                                                                                   |

| Molecular function |                                    |          |          |                 |                   |                                                                                                                                                                                                                     |
|--------------------|------------------------------------|----------|----------|-----------------|-------------------|---------------------------------------------------------------------------------------------------------------------------------------------------------------------------------------------------------------------|
| 5126               | cytokine receptor binding          | 1.58E-07 | 6.82E-06 | 12/164<br>7.3%  | 186/17782<br>1.0% | <i>CXCL10 SPRED1 CXCL8 CSF1 CCL20 TGFB3 IL1B TIFA CXCL1 CXCL3 CXCL2 CX3CL1</i>                                                                                                                                      |
| 8009               | chemokine activity                 | 2.30E-07 | 8.75E-06 | 7/164 4.2%      | 47/17782<br>0.2%  | <i>CXCL10 CXCL8 CCL20 CXCL1 CXCL3 CXCL2 CX3CL1</i>                                                                                                                                                                  |
| 5102               | receptor binding                   | 3.52E-07 | 1.14E-05 | 26/164<br>15.8% | 924/17782<br>5.1% | <i>CXCL8 CSF1 TGFA CXCL1 CXCL3 AREG CXCL2 CX3CL1 SPRED1 FGF9 TIFA APOF MBP ICOSLG MBL2 VAV3 CCL20 TGFB3 WNT5A PROX1 EREG APLN CXCL10 IL1B SAA1 SAA2</i>                                                             |
| 42379              | chemokine receptor binding         | 4.71E-07 | 1.42E-05 | 7/164 4.2%      | 52/17782<br>0.2%  | <i>CXCL10 CXCL8 CCL20 CXCL1 CXCL3 CXCL2 CX3CL1</i>                                                                                                                                                                  |
| 1664               | G-protein-coupled receptor binding | 5.30E-07 | 1.57E-05 | 10/164<br>6.0%  | 136/17782<br>0.7% | <i>CXCL10 CXCL8 CCL20 WNT5A SAA1 SAA2 CXCL1 CXCL3 CXCL2 CX3CL1</i>                                                                                                                                                  |
| Cellular component |                                    |          |          |                 |                   |                                                                                                                                                                                                                     |
| 44421              | extracellular region part          | 3.81E-12 | 1.34E-09 | 35/164<br>21.3% | 985/17782<br>5.5% | <i>CXCL8 CSF1 SERPINE1 TGFA CXCL1 CXCL3 AREG CXCL2 CX3CL1 WNT6 MMP25 MUC2 FGF9 PLAU TIFA APOF MBP LMCD1 ADAMTS9 WNT4 MBL2 IGFBP1 FGFBP1 SERPINB2 CCL20 TGFB3 WNT7B WNT5A WNT9A OLFM4 EREG CXCL10 IL1B SAA1 SAA2</i> |
| 5615               | extracellular space                | 4.76E-11 | 7.81E-09 | 29/164<br>17.6% | 749/17782<br>4.2% | <i>CXCL8 CSF1 SERPINE1 TGFA CXCL1 CXCL3 AREG CXCL2 CX3CL1 FGF9 PLAU TIFA APOF MBP LMCD1 WNT4 MBL2 IGFBP1 FGFBP1 SERPINB2 CCL20 TGFB3 WNT5A OLFM4 EREG CXCL10 IL1B SAA1 SAA2</i>                                     |
| 5576               | extracellular region               | 1.20E-08 | 8.04E-07 | 45/164          | 2026/17782        | <i>SERPINA3 CXCL8 CSF1 NXPH3 SERPINE1 TGFA CXCL1</i>                                                                                                                                                                |

|  |       |       |                                                                                                                                                                                                                                                         |
|--|-------|-------|---------------------------------------------------------------------------------------------------------------------------------------------------------------------------------------------------------------------------------------------------------|
|  | 27.4% | 11.3% | <i>CXCL3 AREG CXCL2 CX3CL1 WNT6 MMP25 MUC2 FGF9<br/>PLAU TIFA APOF OLR1 MBP LMCD1 ADAMTS9 WNT4<br/>MBL2 IGFBP1 FGFBP1 SERPINB2 PSAPL1 CCL20 TGFB3<br/>WNT7B PLA2G4B LGI3 WNT5A WNT9A OLFM4 TUBA4A<br/>EREG APLN CXCL10 IL1B SAA1 SAA2 FAM20A UMODL1</i> |
|--|-------|-------|---------------------------------------------------------------------------------------------------------------------------------------------------------------------------------------------------------------------------------------------------------|

<sup>a</sup> *p*-value in hypergeometric test after correction

<sup>b</sup> The denominator represents the total number of genes with GO annotation and the numerator represents the number of genes belonging to each GO term

<sup>c</sup> The denominator represents the number of reference genes with GO annotation and the numerator represents the number of references genes annotated in the listed GO terms

**Table S8.** KEGG pathway enrichment analysis of differentially expressed genes between Caco-2 cells stimulated with wild-type spore and control.

| Pathway ID | KEGG pathway                                                  | Counts | FDR <sup>a</sup> | Genes ID               |
|------------|---------------------------------------------------------------|--------|------------------|------------------------|
| has04657   | IL-17 signaling pathway                                       | 4      | 0.011595132      | 2919, 3576, 3627, 6364 |
| has04061   | Viral protein interaction with cytokine and cytokine receptor | 4      | 0.011595132      | 2919, 3576, 3627, 6364 |
| has04130   | SNARE interactions in vesicular transport                     | 3      | 0.02446162       | 10228, 6844, 8676      |
| has04062   | Chemokine signaling pathway                                   | 4      | 0.037034227      | 2919, 3576, 3627, 6364 |

<sup>a</sup> False discovery rates

**Table S9.** KEGG pathway enrichment analysis of differentially expressed genes between Caco-2 stimulated with CotG-p75 and control.

| Pathway ID | KEGG pathway                                                  | Counts | FDR <sup>a</sup> | Genes ID                                                                                                    |
|------------|---------------------------------------------------------------|--------|------------------|-------------------------------------------------------------------------------------------------------------|
| has04668   | TNF signaling pathway                                         | 15     | 7.12546E-13      | 1435, 2353, 2919, 2920, 2921, 330, 3383, 3553, 3627, 3659, 4792, 602, 6364, 6376, 7128                      |
| has04657   | IL-17 signaling pathway                                       | 13     | 2.95396E-11      | 2353, 2919, 2920, 2921, 3553, 3576, 3627, 3934, 4792, 6364, 7128, 8061, 9641                                |
| has04064   | NF-kappa B signaling pathway                                  | 13     | 5.89931E-11      | 2919, 2920, 2921, 330, 3383, 3553, 3576, 4791, 4792, 5328, 5971, 7128, 8792                                 |
| has04062   | Chemokine signaling pathway                                   | 14     | 2.49804E-09      | 10451, 1235, 2770, 2919, 2920, 2921, 3576, 3627, 4792, 6364, 6367, 6373, 6376, 6654                         |
| has05323   | Rheumatoid arthritis                                          | 11     | 5.90064E-09      | 1435, 2353, 245972, 2919, 2920, 2921, 3383, 3553, 3576, 6364, 8792                                          |
| has04061   | Viral protein interaction with cytokine and cytokine receptor | 11     | 9.48856E-09      | 1235, 1435, 2919, 2920, 2921, 3576, 3627, 6364, 6367, 6373, 6376                                            |
| has04625   | C-type lectin receptor signaling pathway                      | 11     | 1.16039E-08      | 1959, 22808, 3553, 3659, 3708, 4791, 4792, 5971, 602, 6367, 9641                                            |
| has05417   | Lipid and atherosclerosis                                     | 13     | 5.84093E-08      | 10451, 1543, 2353, 2919, 2920, 2921, 3383, 3553, 3576, 3708, 4792, 4973, 9641                               |
| has05200   | Pathways in cancer                                            | 18     | 7.04811E-08      | 2113, 2254, 2353, 25780, 2770, 330, 3576, 3910, 4791, 4792, 4843, 54361, 6654, 6776, 7039, 7474, 7475, 7477 |

|          |                                                            |    |             |                                                                                     |
|----------|------------------------------------------------------------|----|-------------|-------------------------------------------------------------------------------------|
| has04010 | MAPK signaling pathway                                     | 14 | 1.33198E-07 | 1435, 1846, 1848, 2254, 22808, 2353, 25780, 3553, 374, 4208, 4791, 5971, 6654, 7039 |
| has04060 | Cytokine-cytokine receptor interaction                     | 14 | 1.33198E-07 | 1235, 1435, 2919, 2920, 2921, 3553, 3576, 3604, 3627, 6364, 6367, 6373, 6376, 8792  |
| has04371 | Apelin signaling pathway                                   | 10 | 1.25917E-06 | 100271849, 1958, 22808, 2770, 3708, 4208, 4843, 5054, 5581, 8862                    |
| has04621 | NOD-like receptor signaling pathway                        | 10 | 1.22965E-05 | 2919, 2920, 2921, 330, 3553, 3576, 3708, 4792, 7128, 9641                           |
| has05134 | Legionellosis                                              | 7  | 1.36989E-05 | 2919, 2920, 2921, 3553, 3576, 4791, 4792                                            |
| has05167 | Kaposi sarcoma-associated herpesvirus infection            | 10 | 1.55592E-05 | 1827, 2353, 2919, 2920, 2921, 3383, 3576, 3708, 4792, 9641                          |
| has05205 | Proteoglycans in cancer                                    | 10 | 2.23477E-05 | 10451, 1839, 22808, 3708, 5328, 54361, 6654, 7474, 7475, 7477                       |
| has04620 | Toll-like receptor signaling pathway                       | 8  | 2.23477E-05 | 2353, 3553, 3576, 3627, 4792, 51284, 6373, 9641                                     |
| has04928 | Parathyroid hormone synthesis, secretion and action        | 8  | 2.37996E-05 | 142680, 1839, 1958, 2353, 2770, 3708, 4208, 64386                                   |
| has05120 | Epithelial cell signaling in Helicobacter pylori infection | 7  | 3.04536E-05 | 1839, 245972, 2919, 2920, 2921, 3576, 4792                                          |
| has05166 | Human T-cell leukemia virus 1 infection                    | 10 | 3.04536E-05 | 1958, 1959, 2113, 2353, 3383, 4791, 4792, 5971, 6776, 8061                          |
| has04380 | Osteoclast differentiation                                 | 8  | 6.66824E-05 | 1435, 2353, 3553, 4791, 4792, 5971, 8061,                                           |



|          |                                                      |    |             |                                                                        |
|----------|------------------------------------------------------|----|-------------|------------------------------------------------------------------------|
|          |                                                      |    |             | 8792                                                                   |
| has05224 | Breast cancer                                        | 8  | 0.000150717 | 2254, 2353, 4791, 54361, 6654, 7474, 7475, 7477                        |
| has04933 | AGE-RAGE signaling pathway in diabetic complications | 7  | 0.000169009 | 1958, 3383, 3553, 3576, 5054, 5581, 6776                               |
| has05207 | Chemical carcinogenesis - receptor activation        | 9  | 0.000169009 | 1543, 1545, 2254, 2353, 2770, 54658, 6654, 6776, 9641                  |
| has05146 | Amoebiasis                                           | 7  | 0.000172423 | 2919, 2920, 2921, 3553, 3576, 3910, 4843                               |
| has05142 | Chagas disease                                       | 7  | 0.000172423 | 2353, 2770, 3553, 3576, 4792, 4843, 5054                               |
| has05010 | Alzheimer disease                                    | 11 | 0.000214316 | 100532726, 1435, 3553, 3708, 4698, 4843, 54361, 7277, 7474, 7475, 7477 |
| has05171 | Coronavirus disease - COVID-19                       | 9  | 0.000270001 | 1839, 2353, 3553, 3576, 3627, 4153, 4792, 51284, 9641                  |
| has05164 | Influenza A                                          | 8  | 0.000301011 | 100529063, 3383, 3553, 3576, 3627, 4792, 51284, 9641                   |
| has04360 | Axon guidance                                        | 8  | 0.000410888 | 27289, 2770, 54361, 56963, 6091, 64221, 6585, 7474                     |
| has05133 | Pertussis                                            | 6  | 0.000444201 | 2353, 2770, 3553, 3576, 3659, 4843                                     |
| has04662 | B cell receptor signaling pathway                    | 6  | 0.000605673 | 10451, 2353, 25780, 27071, 4792, 6654                                  |
| has04915 | Estrogen signaling pathway                           | 7  | 0.000667799 | 1839, 2353, 2770, 3708, 3872, 6654, 7039                               |
| has04012 | ErbB signaling pathway                               | 6  | 0.000667799 | 1839, 374, 6654, 6776, 685, 7039                                       |

|          |                                                   |    |             |                                                                        |
|----------|---------------------------------------------------|----|-------------|------------------------------------------------------------------------|
| has05162 | Measles                                           | 7  | 0.000667799 | 2353, 3553, 4792, 51284, 6776, 7128, 9641                              |
| has04024 | cAMP signaling pathway                            | 8  | 0.001044766 | 10451, 2353, 2770, 338442, 4792, 5021, 6752, 8843                      |
| has04150 | mTOR signaling pathway                            | 7  | 0.001119884 | 107080638, 54361, 6654, 7474, 7475, 7477, 8140                         |
| has04390 | Hippo signaling pathway                           | 7  | 0.001162887 | 330, 374, 5054, 54361, 7474, 7475, 7477                                |
| has05022 | Pathways of neurodegeneration - multiple diseases | 11 | 0.001162887 | 100532726, 1435, 3553, 3708, 4698, 4843, 54361, 7277, 7474, 7475, 7477 |
| has05161 | Hepatitis B                                       | 7  | 0.001304395 | 1959, 2353, 3576, 4792, 6654, 6776, 9641                               |
| has04022 | cGMP-PKG signaling pathway                        | 7  | 0.001490406 | 100271849, 146, 2770, 3708, 4208, 4879, 5581                           |
| has05165 | Human papillomavirus infection                    | 9  | 0.001946628 | 245972, 3659, 3910, 54361, 6654, 7474, 7475, 7477, 9641                |
| has04935 | Growth hormone synthesis, secretion and action    | 6  | 0.002364751 | 2353, 2770, 3708, 6654, 6752, 6776                                     |
| has04917 | Prolactin signaling pathway                       | 5  | 0.002948813 | 2353, 3659, 6654, 6776, 8792                                           |
| has05169 | Epstein-Barr virus infection                      | 7  | 0.003604893 | 3383, 3627, 4791, 4792, 5971, 7128, 9641                               |
| has05226 | Gastric cancer                                    | 6  | 0.005880769 | 2254, 54361, 6654, 7474, 7475, 7477                                    |
| has05163 | Human cytomegalovirus infection                   | 7  | 0.005935343 | 2770, 3553, 3576, 3708, 4792, 6376, 6654                               |
| has04921 | Oxytocin signaling pathway                        | 6  | 0.006493762 | 1827, 2353, 2770, 3708, 4208, 5021                                     |

|          |                                              |   |             |                                            |
|----------|----------------------------------------------|---|-------------|--------------------------------------------|
| has04934 | Cushing syndrome                             | 6 | 0.006497304 | 2770, 3708, 54361, 7474, 7475, 7477        |
| has04014 | Ras signaling pathway                        | 7 | 0.006497304 | 1435, 2113, 2254, 22808, 25780, 6654, 7039 |
| has05225 | Hepatocellular carcinoma                     | 6 | 0.008855499 | 54361, 6654, 7039, 7474, 7475, 7477        |
| has04916 | Melanogenesis                                | 5 | 0.009183812 | 2770, 54361, 7474, 7475, 7477              |
| has05145 | Toxoplasmosis                                | 5 | 0.01293083  | 2770, 330, 3910, 4792, 4843                |
| has04623 | Cytosolic DNA-sensing pathway                | 4 | 0.019659669 | 3553, 3627, 4792, 9641                     |
| has05217 | Basal cell carcinoma                         | 4 | 0.019659669 | 54361, 7474, 7475, 7477                    |
| has04926 | Relaxin signaling pathway                    | 5 | 0.019930829 | 2353, 2770, 4792, 4843, 6654               |
| has04015 | Rap1 signaling pathway                       | 6 | 0.020077535 | 10451, 1435, 2254, 22808, 25780, 2770      |
| has04270 | Vascular smooth muscle contraction           | 5 | 0.021360107 | 146, 3708, 4879, 5581, 72                  |
| has00830 | Retinol metabolism                           | 4 | 0.02227781  | 10170, 1543, 220, 54658                    |
| has04210 | Apoptosis                                    | 5 | 0.02227781  | 2353, 330, 3708, 4792, 7277                |
| has05135 | Yersinia infection                           | 5 | 0.02246513  | 10451, 2353, 3553, 3576, 4792              |
| has04622 | RIG-I-like receptor signaling pathway        | 4 | 0.023100838 | 3576, 3627, 4792, 9641                     |
| has05140 | Leishmaniasis                                | 4 | 0.029268427 | 2353, 3553, 4792, 4843                     |
| has00980 | Metabolism of xenobiotics by cytochrome P450 | 4 | 0.029809529 | 1543, 1545, 218, 54658                     |
| has04932 | Non-alcoholic fatty liver disease            | 5 | 0.031952468 | 100532726, 2353, 3553, 3576, 4698          |

|          |                                           |   |             |                                         |
|----------|-------------------------------------------|---|-------------|-----------------------------------------|
| has04218 | Cellular senescence                       | 5 | 0.03215072  | 2113, 22808, 3576, 3708, 5054           |
| has05131 | Shigellosis                               | 6 | 0.032821821 | 3553, 3576, 3708, 4792, 5581, 92610     |
| has04217 | Necroptosis                               | 5 | 0.032902646 | 100526767, 330, 3553, 6776, 7128        |
| has05132 | Salmonella infection                      | 6 | 0.032902646 | 2353, 330, 3553, 3576, 4792, 7277       |
| has04610 | Complement and coagulation cascades       | 4 | 0.034164816 | 4153, 5054, 5055, 5328                  |
| has05210 | Colorectal cancer                         | 4 | 0.034731066 | 2353, 374, 6654, 7039                   |
| has04310 | Wnt signaling pathway                     | 5 | 0.035871726 | 54361, 7474, 7475, 7477, 8061           |
| has04540 | Gap junction                              | 4 | 0.035871726 | 2770, 3708, 6654, 7277                  |
| has05222 | Small cell lung cancer                    | 4 | 0.039732137 | 330, 3910, 4792, 4843                   |
| has04912 | GnRH signaling pathway                    | 4 | 0.040319128 | 1839, 1958, 3708, 6654                  |
| has04130 | SNARE interactions in vesicular transport | 3 | 0.041724462 | 10228, 6844, 8676                       |
| has05020 | Prion disease                             | 6 | 0.04223477  | 100532726, 1958, 3553, 3708, 4698, 7277 |
| has05215 | Prostate cancer                           | 4 | 0.04323765  | 4792, 5328, 6654, 7039                  |
| has05143 | African trypanosomiasis                   | 3 | 0.049332735 | 3383, 3553, 3910                        |

<sup>a</sup> False discovery rates

**Table S10.** KEGG pathway enrichment analysis of differentially expressed genes between Caco-2 stimulated with CotG-p75 and wild-type spore.

| Pathway ID | KEGG pathway                                                  | Counts | FDR <sup>a</sup> | Genes ID                                                                                                    |
|------------|---------------------------------------------------------------|--------|------------------|-------------------------------------------------------------------------------------------------------------|
| 04668      | TNF signaling pathway                                         | 13     | 2.50425E-11      | 1435, 2353, 2919, 2920, 2921, 330, 3553, 3627, 3659, 4792, 6364, 6376, 7128                                 |
| 04010      | MAPK signaling pathway                                        | 16     | 2.28966E-10      | 100137049, 1435, 1846, 1848, 2069, 2254, 2353, 25780, 3553, 374, 4208, 5321, 5971, 6654, 7039, 7043         |
| 05323      | Rheumatoid arthritis                                          | 11     | 8.31903E-10      | 1435, 2353, 245972, 2919, 2920, 2921, 3553, 3576, 6364, 7043, 8792                                          |
| 04657      | IL-17 signaling pathway                                       | 11     | 8.31903E-10      | 2353, 2919, 2920, 2921, 3553, 3576, 3627, 4792, 6364, 7128, 8061                                            |
| 04064      | NF-kappa B signaling pathway                                  | 11     | 1.67879E-09      | 2919, 2920, 2921, 330, 3553, 3576, 4792, 5328, 5971, 7128, 8792                                             |
| 05200      | Pathways in cancer                                            | 18     | 2.7479E-09       | 2113, 2254, 2353, 25780, 2770, 330, 3576, 4792, 4843, 54361, 6654, 6776, 7039, 7043, 7474, 7475, 7477, 7483 |
| 04062      | Chemokine signaling pathway                                   | 12     | 2.19928E-08      | 10451, 2770, 2826, 2919, 2920, 2921, 3576, 3627, 4792, 6364, 6376, 6654                                     |
| 04060      | Cytokine-cytokine receptor interaction                        | 13     | 1.26664E-07      | 1435, 2826, 2919, 2920, 2921, 3553, 3576, 3604, 3627, 6364, 6376, 7043, 8792                                |
| 04061      | Viral protein interaction with cytokine and cytokine receptor | 9      | 3.56622E-07      | 1435, 2826, 2919, 2920, 2921, 3576, 3627, 6364, 6376                                                        |
| 05417      | Lipid and atherosclerosis                                     | 11     | 6.38522E-07      | 10451, 1543, 2353, 2919, 2920, 2921, 3553, 3576, 3708, 4792, 4973                                           |
| 05226      | Gastric cancer                                                | 9      | 5.12245E-06      | 2254, 4583, 54361, 6654, 7043, 7474, 7475, 7477, 7483                                                       |

|       |                                                            |    |             |                                                               |
|-------|------------------------------------------------------------|----|-------------|---------------------------------------------------------------|
| 05207 | Chemical carcinogenesis - receptor activation              | 10 | 5.12245E-06 | 1543, 1545, 2254, 2353, 2770, 54575, 54600, 54658, 6654, 6776 |
| 05146 | Amoebiasis                                                 | 8  | 5.12245E-06 | 2919, 2920, 2921, 3553, 3576, 4583, 4843, 7043                |
| 05142 | Chagas disease                                             | 8  | 5.12245E-06 | 2353, 2770, 3553, 3576, 4792, 4843, 5054, 7043                |
| 04390 | Hippo signaling pathway                                    | 9  | 5.7709E-06  | 330, 374, 5054, 54361, 7043, 7474, 7475, 7477, 7483           |
| 05225 | Hepatocellular carcinoma                                   | 9  | 8.8381E-06  | 54361, 6654, 7039, 7043, 7474, 7475, 7477, 7483, 8193         |
| 04621 | NOD-like receptor signaling pathway                        | 9  | 1.66793E-05 | 2919, 2920, 2921, 330, 3553, 3576, 3708, 4792, 7128           |
| 04371 | Apelin signaling pathway                                   | 8  | 2.74094E-05 | 1958, 2770, 3708, 4208, 4843, 5054, 5581, 8862                |
| 05205 | Proteoglycans in cancer                                    | 9  | 3.11702E-05 | 10451, 3708, 5328, 54361, 6654, 7474, 7475, 7477, 7483        |
| 05224 | Breast cancer                                              | 8  | 3.68226E-05 | 2254, 2353, 54361, 6654, 7474, 7475, 7477, 7483               |
| 04933 | AGE-RAGE signaling pathway in diabetic complications       | 7  | 5.17715E-05 | 1958, 3553, 3576, 5054, 5581, 6776, 7043                      |
| 05134 | Legionellosis                                              | 6  | 5.60911E-05 | 2919, 2920, 2921, 3553, 3576, 4792                            |
| 00830 | Retinol metabolism                                         | 6  | 0.000120217 | 10170, 1543, 220, 54575, 54600, 54658                         |
| 05120 | Epithelial cell signaling in Helicobacter pylori infection | 6  | 0.000131535 | 245972, 2919, 2920, 2921, 3576, 4792                          |
| 04380 | Osteoclast differentiation                                 | 7  | 0.000161756 | 1435, 2353, 3553, 4792, 5971, 8061, 8792                      |
| 05167 | Kaposi sarcoma-associated herpesvirus infection            | 8  | 0.000161756 | 1827, 2353, 2919, 2920, 2921, 3576, 3708, 4792                |
| 05133 | Pertussis                                                  | 6  | 0.00017026  | 2353, 2770, 3553, 3576, 3659, 4843                            |
| 05010 | Alzheimer disease                                          | 10 | 0.000195759 | 1435, 3553, 3708, 4843, 54361, 7277, 7474, 7475, 7477, 7483   |

|       |                                                     |    |             |                                                                   |
|-------|-----------------------------------------------------|----|-------------|-------------------------------------------------------------------|
| 05022 | Pathways of neurodegeneration - multiple diseases   | 11 | 0.000228264 | 1435, 1767, 3553, 3708, 4843, 54361, 7277, 7474, 7475, 7477, 7483 |
| 05210 | Colorectal cancer                                   | 6  | 0.000269353 | 2069, 2353, 374, 6654, 7039, 7043                                 |
| 05166 | Human T-cell leukemia virus 1 infection             | 8  | 0.000287238 | 1958, 2113, 2353, 4792, 5971, 6776, 7043, 8061                    |
| 04921 | Oxytocin signaling pathway                          | 7  | 0.000344894 | 100137049, 1827, 2353, 2770, 3708, 4208, 5321                     |
| 04150 | mTOR signaling pathway                              | 7  | 0.000344894 | 54361, 6654, 7474, 7475, 7477, 7483, 8140                         |
| 04934 | Cushing syndrome                                    | 7  | 0.000344894 | 2770, 3708, 54361, 7474, 7475, 7477, 7483                         |
| 04014 | Ras signaling pathway                               | 8  | 0.000362428 | 100137049, 1435, 2113, 2254, 25780, 5321, 6654, 7039              |
| 04217 | Necroptosis                                         | 7  | 0.000373385 | 100137049, 100526767, 330, 3553, 5321, 6776, 7128                 |
| 04916 | Melanogenesis                                       | 6  | 0.000453592 | 2770, 54361, 7474, 7475, 7477, 7483                               |
| 04928 | Parathyroid hormone synthesis, secretion and action | 6  | 0.000549687 | 1958, 2353, 2770, 3708, 4208, 64386                               |
| 00140 | Steroid hormone biosynthesis                        | 5  | 0.00084235  | 1543, 1545, 54575, 54600, 54658                                   |
| 04935 | Growth hormone synthesis, secretion and action      | 6  | 0.000879993 | 2353, 2770, 3708, 6654, 6752, 6776                                |
| 05217 | Basal cell carcinoma                                | 5  | 0.000901488 | 54361, 7474, 7475, 7477, 7483                                     |
| 05204 | Chemical carcinogenesis - DNA adducts               | 5  | 0.001226583 | 1543, 1545, 54575, 54600, 54658                                   |
| 04917 | Prolactin signaling pathway                         | 5  | 0.001262591 | 2353, 3659, 6654, 6776, 8792                                      |
| 05140 | Leishmaniasis                                       | 5  | 0.001745783 | 2353, 3553, 4792, 4843, 7043                                      |
| 00980 | Metabolism of xenobiotics by cytochrome P450        | 5  | 0.001788964 | 1543, 1545, 54575, 54600, 54658                                   |
| 05163 | Human cytomegalovirus infection                     | 7  | 0.001822812 | 2770, 3553, 3576, 3708, 4792, 6376, 6654                          |
| 04662 | B cell receptor signaling pathway                   | 5  | 0.002053926 | 10451, 2353, 25780, 4792, 6654                                    |

|       |                                                  |    |             |                                                                                                            |
|-------|--------------------------------------------------|----|-------------|------------------------------------------------------------------------------------------------------------|
| 05165 | Human papillomavirus infection                   | 8  | 0.002216921 | 245972, 3659, 54361, 6654, 7474, 7475, 7477, 7483                                                          |
| 04012 | ErbB signaling pathway                           | 5  | 0.002244196 | 2069, 374, 6654, 6776, 7039                                                                                |
| 05161 | Hepatitis B                                      | 6  | 0.002777254 | 2353, 3576, 4792, 6654, 6776, 7043                                                                         |
| 04912 | GnRH signaling pathway                           | 5  | 0.00297208  | 100137049, 1958, 3708, 5321, 6654                                                                          |
| 04310 | Wnt signaling pathway                            | 6  | 0.00297208  | 54361, 7474, 7475, 7477, 7483, 8061                                                                        |
| 04750 | Inflammatory mediator regulation of TRP channels | 5  | 0.003468564 | 100137049, 3553, 3708, 5321, 5581                                                                          |
| 04620 | Toll-like receptor signaling pathway             | 5  | 0.0041226   | 2353, 3553, 3576, 3627, 4792                                                                               |
| 04625 | C-type lectin receptor signaling pathway         | 5  | 0.0041226   | 3553, 3659, 3708, 4792, 5971                                                                               |
| 04360 | Axon guidance                                    | 6  | 0.0041226   | 27289, 2770, 54361, 6091, 7474, 9901                                                                       |
| 01100 | Metabolic pathways                               | 16 | 0.004546879 | 100137049, 10170, 130367, 1543, 189, 220, 245972, 2571, 4837, 4843, 5321, 54575, 54600, 54658, 8707, 93432 |
| 05202 | Transcriptional misregulation in cancer          | 6  | 0.005016785 | 1848, 330, 3576, 4208, 5328, 6495                                                                          |
| 05145 | Toxoplasmosis                                    | 5  | 0.005027348 | 2770, 330, 4792, 4843, 7043                                                                                |
| 04913 | Ovarian steroidogenesis                          | 4  | 0.005286714 | 100137049, 1543, 1545, 5321                                                                                |
| 04926 | Relaxin signaling pathway                        | 5  | 0.007977215 | 2353, 2770, 4792, 4843, 6654                                                                               |
| 04730 | Long-term depression                             | 4  | 0.007977215 | 100137049, 2770, 3708, 5321                                                                                |
| 04024 | cAMP signaling pathway                           | 6  | 0.008106529 | 10451, 2353, 2770, 4792, 6752, 8843                                                                        |
| 04270 | Vascular smooth muscle contraction               | 5  | 0.008519174 | 100137049, 146, 3708, 5321, 5581                                                                           |
| 04210 | Apoptosis                                        | 5  | 0.00907171  | 2353, 330, 3708, 4792, 7277                                                                                |
| 05135 | Yersinia infection                               | 5  | 0.009166798 | 10451, 2353, 3553, 3576, 4792                                                                              |



|       |                                                          |   |             |                                     |
|-------|----------------------------------------------------------|---|-------------|-------------------------------------|
| 04915 | Estrogen signaling pathway                               | 5 | 0.009263107 | 2353, 2770, 3708, 6654, 7039        |
| 05162 | Measles                                                  | 5 | 0.00936062  | 2353, 3553, 4792, 6776, 7128        |
| 05171 | Coronavirus disease - COVID-19                           | 6 | 0.009440184 | 2353, 3553, 3576, 3627, 4153, 4792  |
| 04664 | Fc epsilon RI signaling pathway                          | 4 | 0.009899859 | 100137049, 10451, 5321, 6654        |
| 04550 | Signaling pathways regulating pluripotency of stem cells | 5 | 0.009899859 | 54361, 7474, 7475, 7477, 7483       |
| 05211 | Renal cell carcinoma                                     | 4 | 0.010047825 | 2113, 6654, 7039, 7043              |
| 05131 | Shigellosis                                              | 6 | 0.011593391 | 3553, 3576, 3708, 4792, 5581, 92610 |
| 05132 | Salmonella infection                                     | 6 | 0.011826377 | 2353, 330, 3553, 3576, 4792, 7277   |
| 05220 | Chronic myeloid leukemia                                 | 4 | 0.01251292  | 4792, 6654, 6776, 7043              |
| 04218 | Cellular senescence                                      | 5 | 0.01251292  | 2113, 3576, 3708, 5054, 7043        |
| 04022 | cGMP-PKG signaling pathway                               | 5 | 0.015615484 | 146, 2770, 3708, 4208, 5581         |
| 04610 | Complement and coagulation cascades                      | 4 | 0.016284844 | 4153, 5054, 5055, 5328              |
| 04540 | Gap junction                                             | 4 | 0.01764484  | 2770, 3708, 6654, 7277              |
| 04976 | Bile secretion                                           | 4 | 0.017959082 | 54575, 54600, 54658, 9429           |
| 05152 | Tuberculosis                                             | 5 | 0.019168941 | 245972, 3553, 3656, 4843, 7043      |
| 00053 | Ascorbate and aldarate metabolism                        | 3 | 0.02080148  | 54575, 54600, 54658                 |
| 05215 | Prostate cancer                                          | 4 | 0.021515156 | 4792, 5328, 6654, 7039              |
| 04666 | Fc gamma R-mediated phagocytosis                         | 4 | 0.021515156 | 100137049, 10451, 5321, 5581        |
| 05231 | Choline metabolism in cancer                             | 4 | 0.021849107 | 100137049, 2353, 5321, 6654         |
| 05130 | Pathogenic Escherichia coli infection                    | 5 | 0.024472205 | 2353, 3553, 3576, 4792, 7277        |
| 00040 | Pentose and glucuronate interconversions                 | 3 | 0.024641226 | 54575, 54600, 54658                 |

|       |                                      |   |             |                                   |
|-------|--------------------------------------|---|-------------|-----------------------------------|
| 04660 | T cell receptor signaling pathway    | 4 | 0.024700083 | 10451, 2353, 4792, 6654           |
| 04659 | Th17 cell differentiation            | 4 | 0.026324568 | 2353, 3553, 4792, 6776            |
| 04015 | Rap1 signaling pathway               | 5 | 0.02892787  | 10451, 1435, 2254, 25780, 2770    |
| 04724 | Glutamatergic synapse                | 4 | 0.030406361 | 100137049, 2770, 3708, 5321       |
| 04726 | Serotonergic synapse                 | 4 | 0.030770862 | 100137049, 2770, 3708, 5321       |
| 00860 | Porphyrin and chlorophyll metabolism | 3 | 0.035375045 | 54575, 54600, 54658               |
| 04611 | Platelet activation                  | 4 | 0.036644255 | 100137049, 2770, 3708, 5321       |
| 04151 | PI3K-Akt signaling pathway           | 6 | 0.037738474 | 1435, 2069, 2254, 374, 6654, 7039 |
| 04020 | Calcium signaling pathway            | 5 | 0.041969271 | 146, 2254, 3708, 4843, 5724       |
| 05144 | Malaria                              | 3 | 0.044599339 | 3553, 3576, 7043                  |

<sup>a</sup>False discovery rates

**Table S11.** Primers used for RT-qPCR for selected genes.

| Accession number | Gene symbols   | Forward primer (5'→3')   | Reverse primer (5'→3')   |
|------------------|----------------|--------------------------|--------------------------|
| NM_001657        | <i>AREG</i>    | GCACCTGGAAGCAGTAACATGC   | GGCAGCTATGGCTGCTAATGCA   |
| NM_003236        | <i>TGFA</i>    | GGTCCGAAAACACTGTGAGTGG   | CAAACCTCCTCCTCTGGGCTCTT  |
| NM_001729        | <i>BTC</i>     | CCTCTTCGGAAACGTCGTAAAAG  | CTTGCCACCAACCTGGAGGTAA   |
| NM_001945        | <i>HBEGF</i>   | TGTATCCACGGACCAGCTGCTA   | TGCTCCTCCTTGTTTGGTGTGG   |
| NM_001165        | <i>BIRC3</i>   | GCTTTTGCTGTGATGGTGGACTC  | CTTGACGGATGAACTCCTGTCC   |
| NM_020529        | <i>NFKB1A</i>  | TCCACTCCATCCTGAAGGCTAC   | CAAGGACACCAAAAGCTCCACG   |
| NM_006290        | <i>TNFAIP3</i> | CTCAACTGGTGTGCGAGAAGTCC  | TTCCTTGAGCGTGCTGAACAGC   |
| NM_002502        | <i>NFKB2</i>   | GGCAGACCAGTGTGATTGAGCA   | CAGCAGAAAGCTCACCACACTC   |
| NM_006509        | <i>RELB</i>    | TGTGGTGAGGATCTGCTTCCAG   | TCGGCAAATCCGCAGCTCTGAT   |
| NM_001511        | <i>CXCL1</i>   | AGCTTGCCTCAATCCTGCATCC   | TCCTTCAGGAACAGCCACCAGT   |
| NM_002089        | <i>CXCL2</i>   | GGCAGAAAGCTTGTCTCAACCC   | CTCCTTCAGGAACAGCCACCAA   |
| NM_002090        | <i>CXCL3</i>   | TTCACCTCAAGAACATCCAAAGTG | TTCTTCCCATTCTTGAGTGTGGC  |
| NM_000584        | <i>CXCL8</i>   | GAGAGTGATTGAGAGTGGACCAC  | CACAACCCTCTGCACCCAGTTT   |
| NM_001565        | <i>CXCL10</i>  | GGTGAGAAGAGATGTCTGAATCC  | GTCCATCCTTGGAAGCACTGCA   |
| NM_005409        | <i>CXCL11</i>  | AAGGACAACGATGCCTAAATCCC  | CAGATGCCCTTTTCCAGGACTTC  |
| NM_004591        | <i>CCL20</i>   | AAGTTGTCTGTGTGCGCAAATCC  | CCATTCCAGAAAAGCCACAGTTTT |
| NM_000757        | <i>CSF1</i>    | TGAGACACCTCTCCAGTTGCTG   | GCAATCAGGCTTGGTCACCACA   |

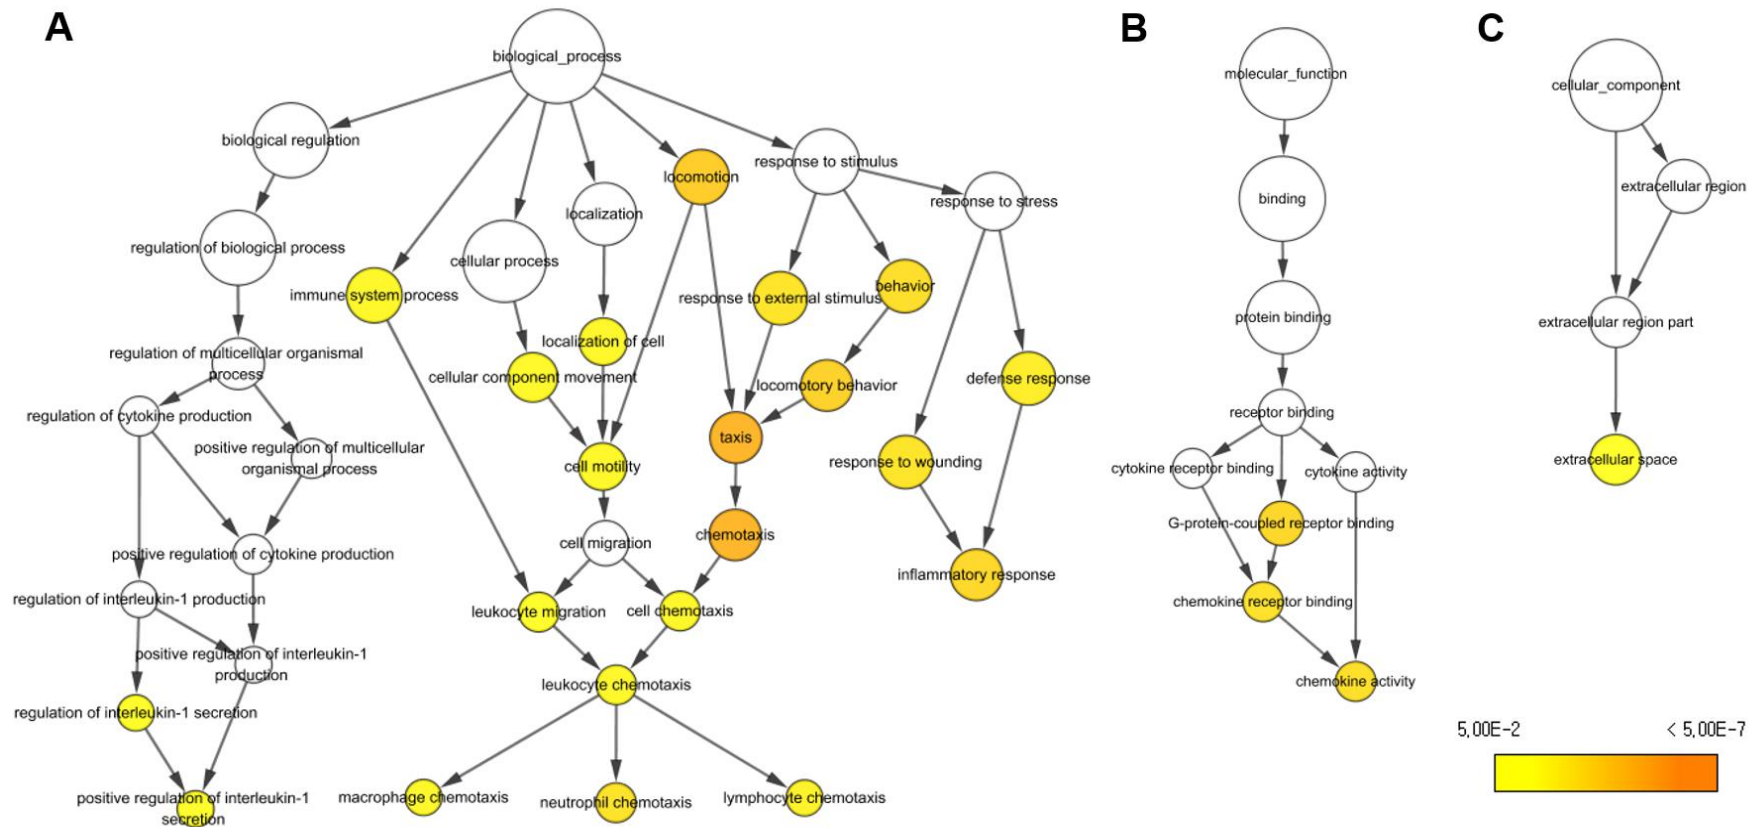

**Figure S1.** Illustration of Gene Ontology (GO) term networks of differentially expressed genes between wild-type spore treated Caco-2 and control. The networks were generated by Cytoscape BiNGO. All significantly enriched GO terms in biological process (A), molecular function (B), and cellular component (C) are presented. Circle size represents GO hierarchy. Yellow shade represents enrichment level. The threshold of hypergeometric distribution of the functional annotation was set at corrected  $p$ -value < 0.05.

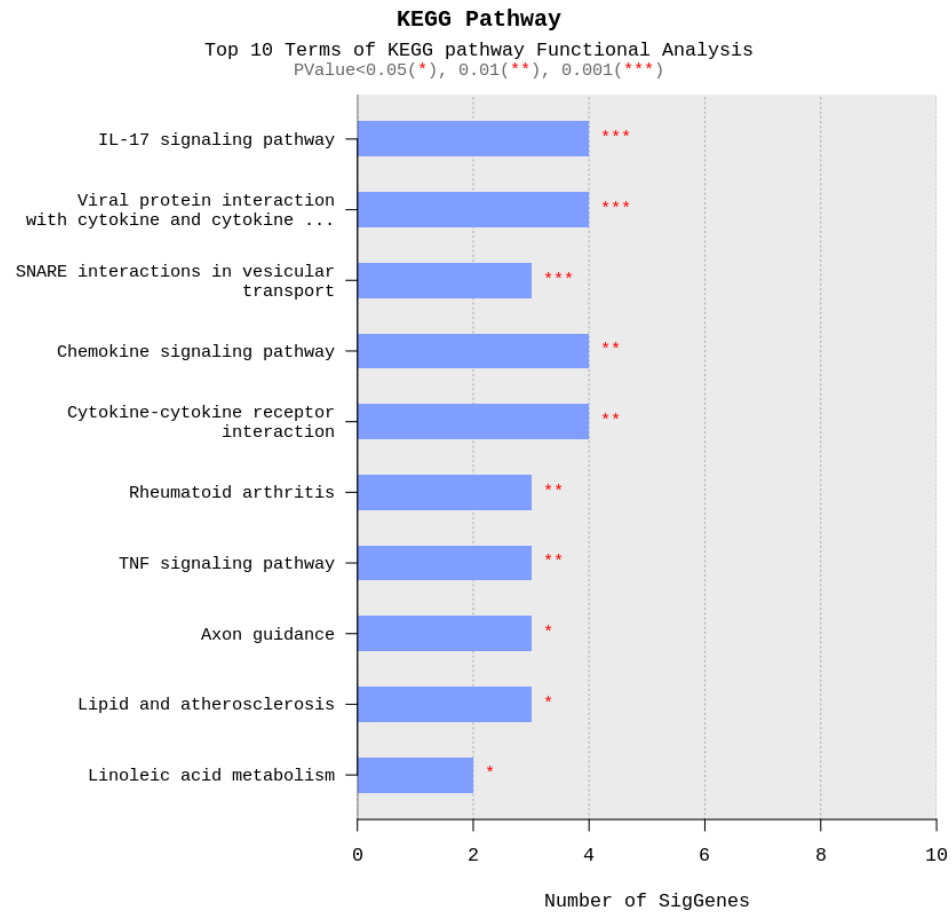

**Figure S2.** Top 10 KEGG pathways enriched in differentially expressed genes between wild-type spore treated Caco-2 and control. Asterisks (\*) represent a significance difference from the control (\*  $p < 0.05$ , \*\*  $p < 0.01$ , \*\*\*  $p < 0.001$ ).

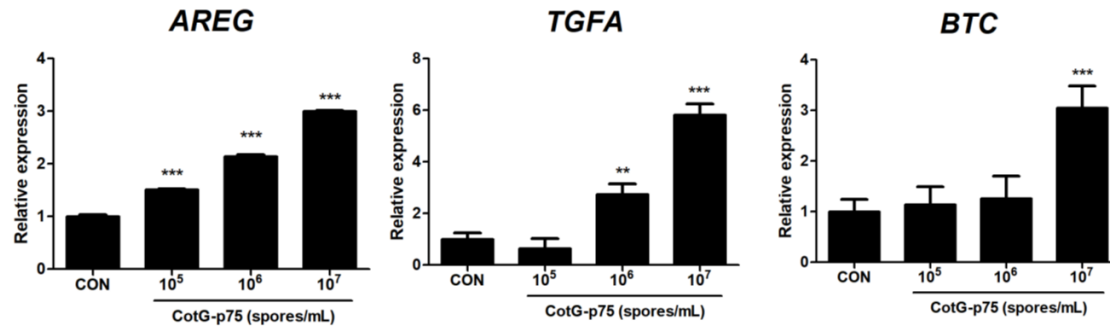

**Figure S3.** The mRNA expression of the genes involved in EGFR signaling from Caco-2 cells stimulated by different doses of CotG-p75. Caco-2 cells were incubated with 10<sup>5</sup>, 10<sup>6</sup>, and 10<sup>7</sup> spores/mL of CotG-p75 for 3 h. The relative expression level was determined by real-time quantitative PCR. RT-qPCR data presented as mean  $\pm$  standard deviation (n = 3). Statistical analysis was performed by a one-way ANOVA and Tukey-Kramer post-hoc analysis. Asterisks (\*) indicate a significance difference from the control (\*  $p < 0.05$ , \*\*  $p < 0.01$ , \*\*\*  $p < 0.001$ ).

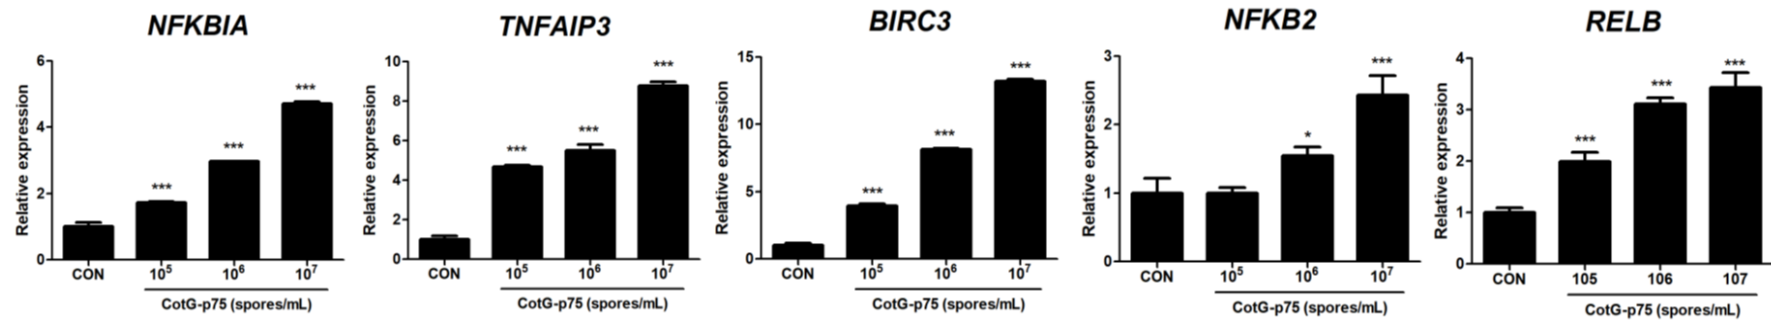

**Figure S4.** The mRNA expression of the genes involved in NF-κB signaling from Caco-2 cells stimulated by different doses of CotG-p75. Caco-2 cells were incubated with 10<sup>5</sup>, 10<sup>6</sup>, and 10<sup>7</sup> spores/mL of CotG-p75 for 3 h. The relative expression level was determined by real-time quantitative PCR. RT-qPCR data presented as mean ± standard deviation (n = 3). Statistical analysis was performed by a one-way ANOVA and Tukey-Kramer post-hoc analysis. Asterisks (\*) indicate a significance difference from the control (\*  $p < 0.05$ , \*\*  $p < 0.01$ , \*\*\*  $p < 0.001$ ).

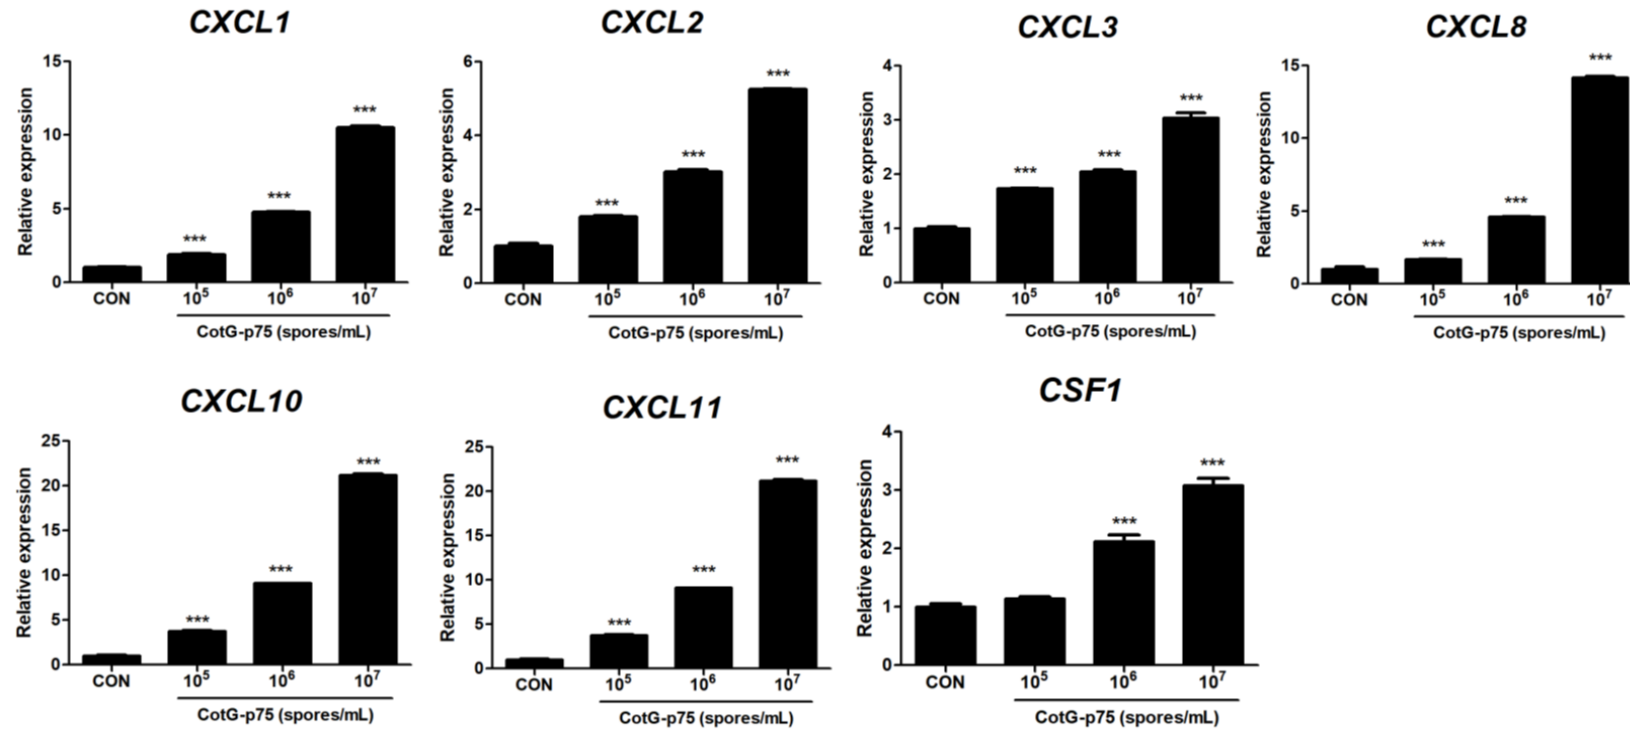

**Figure S5.** The mRNA expression of the genes involved in immune response from Caco-2 cells stimulated by different doses of CotG-p75. Caco-2 cells were incubated with  $10^5$ ,  $10^6$ , and  $10^7$  spores/mL of CotG-p75 for 3 h. The relative expression level was determined by real-time quantitative PCR. RT-qPCR data presented as mean  $\pm$  standard deviation ( $n = 3$ ). Statistical analysis was performed by a one-way ANOVA and Tukey-Kramer post-hoc analysis. Asterisks (\*) indicate a significance difference from the control (\*  $p < 0.05$ , \*\*  $p < 0.01$ , \*\*\*  $p < 0.001$ ).



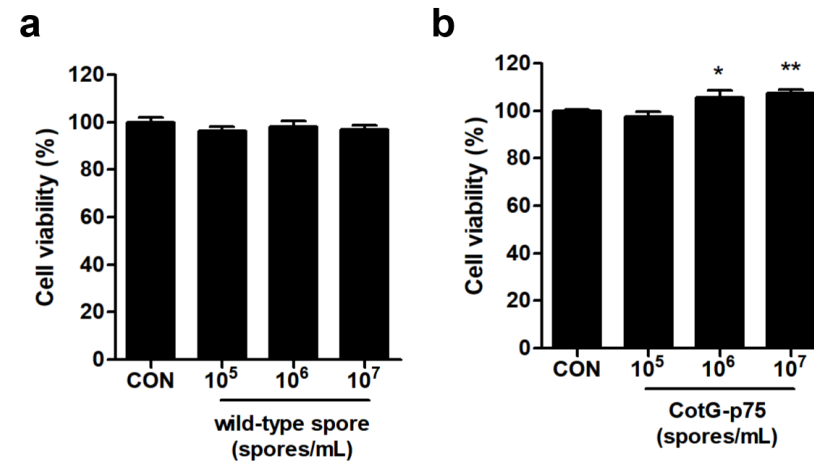

**Figure S6.** Effect of wild-type spores and CotG-p75 on cell viability of intestinal epithelial Caco-2 cells. Cell viability was determined after 24 h incubation with each spore. Each column represents the mean  $\pm$  standard deviation with respect to 100% control. All experiments were performed independently in triplicates. Statistical analysis was performed by a one-way ANOVA and Tukey-Kramer post-hoc analysis. Asterisks (\*) indicate a significance difference from the control (\*  $p < 0.05$ , \*\*  $p < 0.01$ , \*\*\*  $p < 0.001$ ).
